# Supplementary material for: Cobalt-catalyzed highly selective hydroxylation of organohydrosilanes and hydrosiloxanes
Source: Royal Society of Chemistry journal article supplement (doi:10.1039/d2qo01294d), 2022-01-01

## ***Supplementary information***

### **Cobalt-catalyzed Highly Selective Hydroxylation of Organohydrosilanes and Hydrosiloxanes**

Peng Guo, Ling-Chao Cheng, Xinglei He and Ke-Yin Ye\*

Key Laboratory for Molecule Synthesis and Function Discovery (Fujian Province University), College of Chemistry, Fuzhou University, Fuzhou 350108, China.

\* E-mail: [kyye@fzu.edu.cn](mailto:kyye@fzu.edu.cn)

## Table of Contents

|    |                                                                        |       |
|----|------------------------------------------------------------------------|-------|
| 1. | General Information                                                    | 3     |
| 2. | Optimizations of Reaction Conditions                                   | 5     |
| 3. | General Procedures                                                     | 8     |
|    | GP1 – <i>Co-catalyzed the synthesis of silanols</i>                    |       |
|    | GP2 – <i>Co-catalyzed the synthesis of disiloxanes</i>                 |       |
|    | GP3 – <i>Co-catalyzed the synthesis of alkyloxylsilanes</i>            |       |
| 4. | Characterization of Products                                           | 10    |
| 5. | X-ray Diffraction Analyses of Cobalt Complexes <b>K1</b> and <b>K2</b> | 26    |
| 6. | The Synthesis and Characterization of Silicon Polymer                  | 35    |
| 7. | Mechanistic Studies                                                    | 37-44 |
|    | 7.1 Exploration of the origin of the oxygen atom                       |       |
|    | 7.2 Analysis of H <sub>2</sub> gas by gas chromatography               |       |
|    | 7.3 Radical inhibition experiment                                      |       |
|    | 7.4 Proof of a stereo-retentive oxidation                              |       |
|    | 7.5 Investigation on the selectivity of silanol and disiloxane         |       |
| 8. | References                                                             | 45    |
| 9. | NMR Spectra                                                            | 46    |

# 1. General Information

All reactions were performed under an atmosphere of nitrogen using standard Schlenk techniques, unless otherwise indicated. All commercial reagents were used without further purification unless otherwise noted. Reactions were monitored by thin-layer chromatography (TLC) analysis. TLC plates were viewed under UV light and stained with potassium permanganate. Yields refer to products isolated after purification by column chromatography unless otherwise stated. Proton nuclear magnetic resonance ( $^1\text{H}$  NMR) spectra, carbon nuclear magnetic resonance ( $^{13}\text{C}$  NMR) spectra, and fluorine nuclear magnetic resonance ( $^{19}\text{F}$  NMR) were recorded on Bruker AV-400 (400 MHz) and JEOL-500 (500 MHz) spectrometers. NMR samples were dissolved in  $\text{CDCl}_3$  (unless specified otherwise) and chemical shifts are reported in ppm referenced to residual non-deuterated solvent. IR spectra were obtained from Thermo Scientific NICOLET 380 FT-IR (KCl card). HRMS were obtained on an Exactive Plus LC-MS (ESI) mass spectrometer with the use of a quadrupole analyzer or Agilent 7820A GC-MS with EI mode.

The number-average molecular weight ( $M_n$ ), weight-average molecular weight ( $M_w$ ) and the Polydispersity index ( $\text{PDI} = M_w/M_n$ ) of the obtained polymers were determined by a Waters 1515 series gel permeation chromatograph (GPC) equipped with a Waters 2414 refractive index detector, using a Styragel HR3THF (7.8×300 mm) Column, and a Styragel HR4THF (7.8×300 mm) Column with measurable molecular weights ranging from 102 to 106  $\text{g mol}^{-1}$ .

## Unsuccessful substrates:

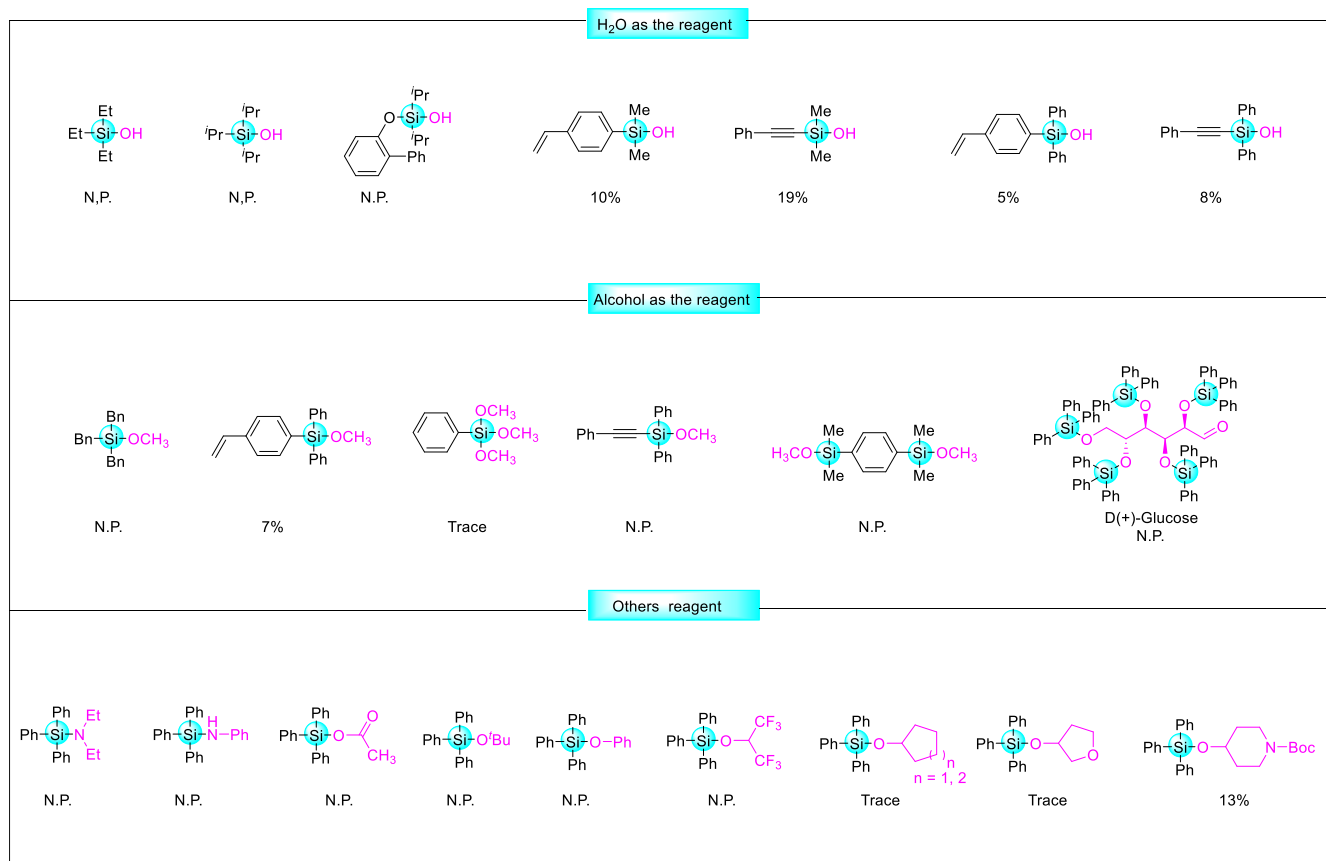

### Scheme S1. Substrate scope of disiloxanes.

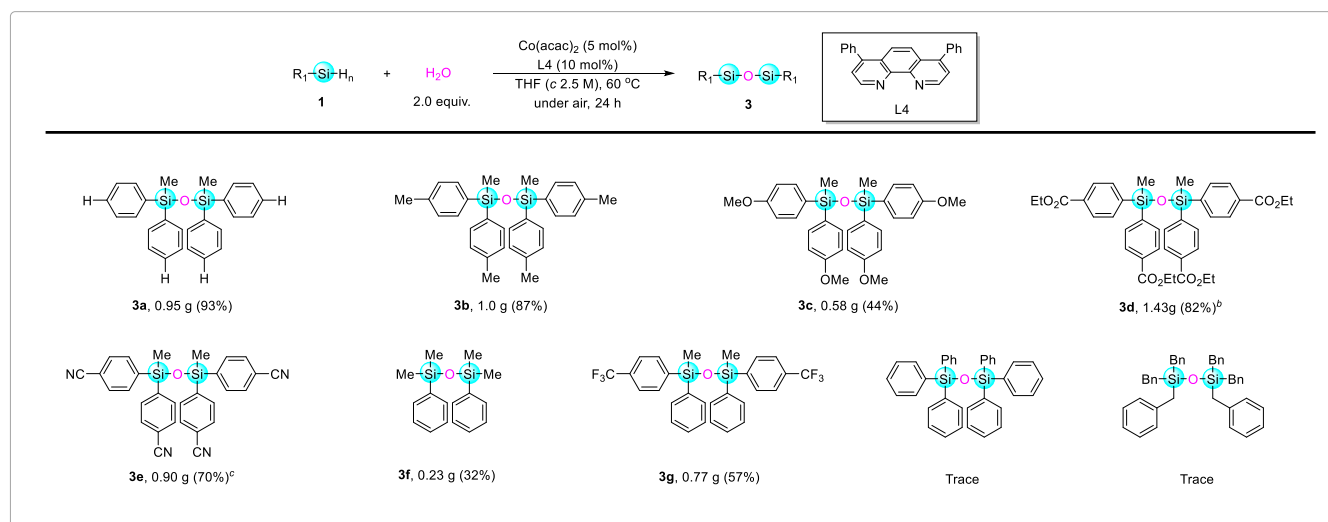

<sup>a</sup> Reaction conditions B: **1** (5 mmol, 1.0 equiv.), H<sub>2</sub>O (10 mmol, 2.0 equiv.), Co(acac)<sub>2</sub> (0.25 mmol, 5 mol%), and **L4** (0.5 mmol, 10 mol%) were added THF (*c* 2.5 M) under air at 60 °C for 24 h; <sup>b</sup> Reaction temperature at -20 °C for 3 h; <sup>c</sup> Reaction temperature at -20 °C for 1 h.

### Scheme S2. Additional substrate scope of alkoxyasilanes.

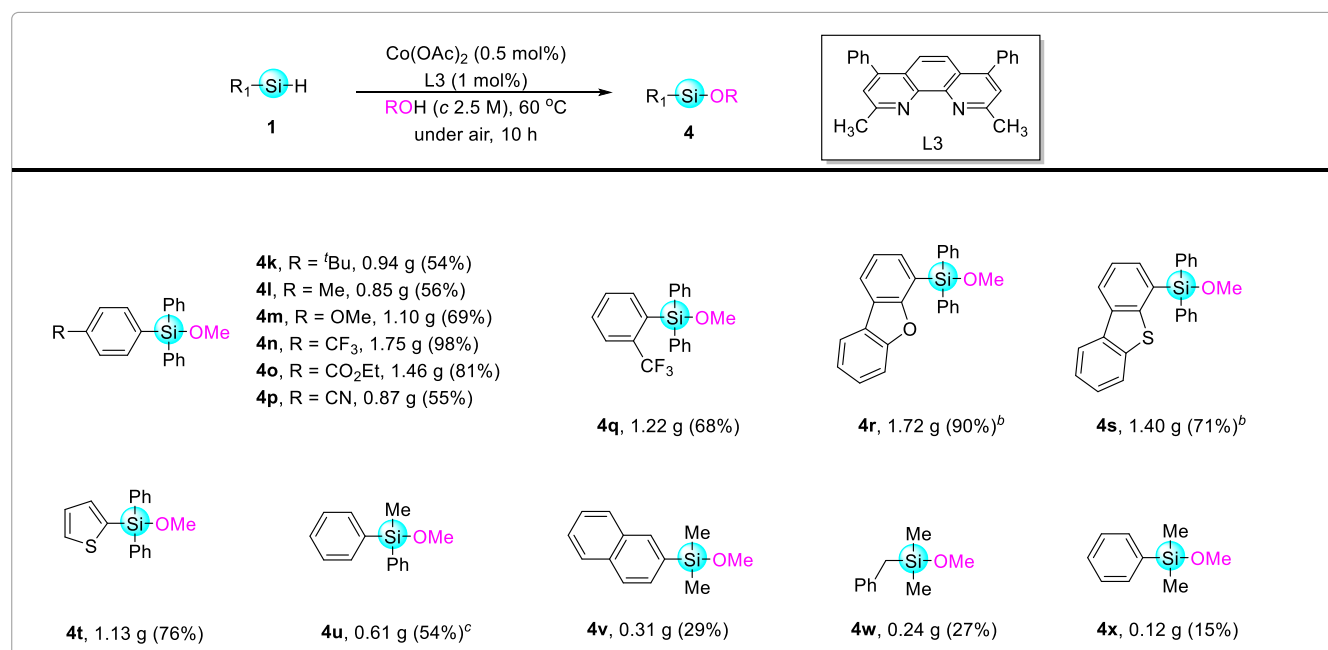

<sup>a</sup> Reaction conditions: **1** (5 mmol, 1.0 equiv.), Co(OAc)<sub>2</sub> (0.025 mmol, 0.5 mol%), and **L3** (0.05 mmol, 1 mol%) were added to alcohols (*c* 2.5 M) under air at 60 °C for 10 h; <sup>b</sup> CH<sub>3</sub>OH (4.0 mL), dichloromethane (1.0 mL) and 1,4-dioxane (1.0 mL) as the co-solvent; <sup>c</sup> 5 mol% Co(OAc)<sub>2</sub>.

## 2. Optimization of Reaction Conditions

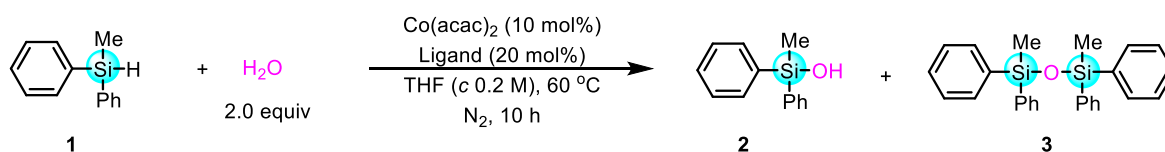

| Entry <sup>a</sup> | Ligand | <b>2</b> <sup>b</sup> | <b>3</b> <sup>b</sup> |
|--------------------|--------|-----------------------|-----------------------|
| 1                  | L1     | 68%                   | 7%                    |
| 2                  | L2     | 65%                   | 8%                    |
| 3                  | L3     | 81%                   | trace                 |
| 4                  | L4     | < 5%                  | 89%                   |
| 5                  | L5     | trace                 | trace                 |
| 6                  | L6     | 18%                   | trace                 |
| 7                  | L7     | 43%                   | 3%                    |
| 8                  | L8     | trace                 | trace                 |
| 9                  | L9     | 5%                    | trace                 |
| 10                 | L10    | 68%                   | trace                 |

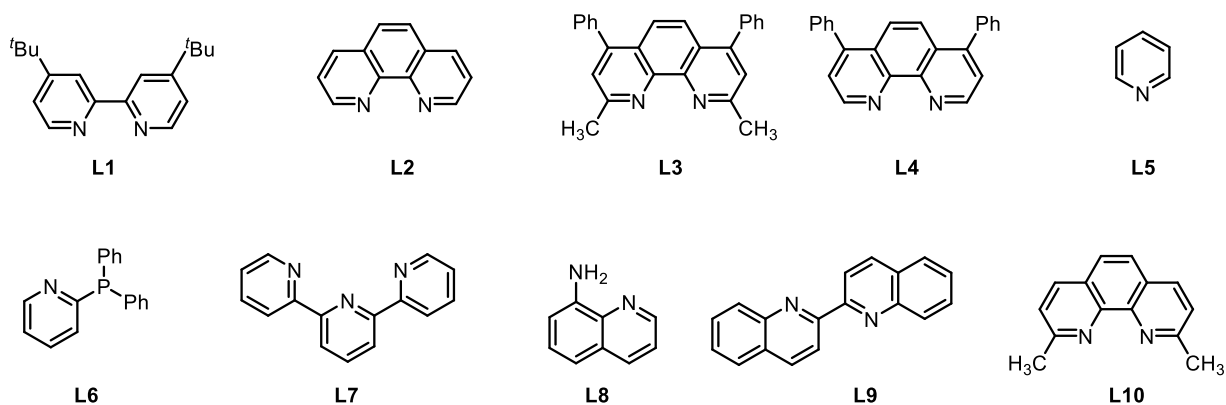

<sup>a</sup> Reaction conditions: **1** (0.2 mmol, 1.0 equiv.),  $\text{H}_2\text{O}$  (0.4 mmol, 2.0 equiv.),  $\text{Co}(\text{acac})_2$  (0.02 mmol, 10 mol%) and Ligand (0.04 mmol, 20 mol%) were added to THF (*c* 0.2 M) under nitrogen atmosphere for 10 h. <sup>b</sup> The yield was given with  $\text{CH}_2\text{Br}_2$  as the internal standard.

### 2.1 Optimization of the hydroxylation of silanes

### 2.1.1 Screening of the cobalt catalysts

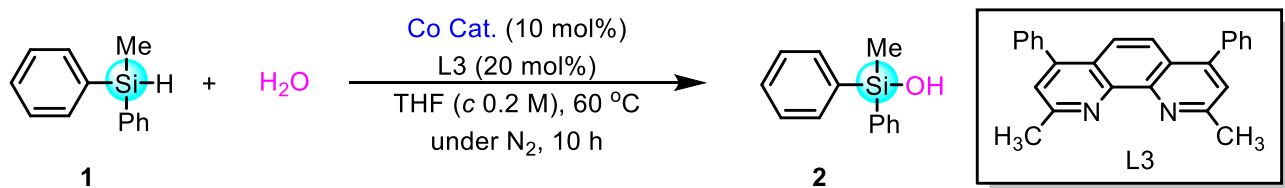

| Entry <sup>a</sup> | Co cat.                                              | Yield <sup>b</sup> |
|--------------------|------------------------------------------------------|--------------------|
| 1                  | Co(OAc) <sub>2</sub> ·4H <sub>2</sub> O              | 80%                |
| 2                  | CoCl <sub>2</sub> ·6H <sub>2</sub> O                 | trace              |
| 3                  | CoF <sub>2</sub>                                     | 27%                |
| 4                  | CoCl <sub>2</sub>                                    | trace              |
| 5                  | CoBr <sub>2</sub>                                    | trace              |
| 6                  | CoF <sub>2</sub> ·4H <sub>2</sub> O                  | 74%                |
| 7                  | Co(BF <sub>4</sub> ) <sub>2</sub> ·6H <sub>2</sub> O | trace              |
| 8                  | Co(OAc) <sub>2</sub>                                 | 87%                |
| 9                  | Co(acac) <sub>2</sub>                                | 81%                |

<sup>a</sup> Reaction conditions: **1** (0.2 mmol, 1.0 equiv.), H<sub>2</sub>O (0.4 mmol, 2.0 equiv.), Co Cat. (0.02 mmol, 10 mol%) and **L3** (0.04 mmol, 20 mol%) were added to THF (*c* 0.2 M) under nitrogen atmosphere for 10 h. <sup>b</sup> The yield was given with CH<sub>2</sub>Br<sub>2</sub> as the internal standard.

### 2.1.2 Screening of the solvents and reaction time

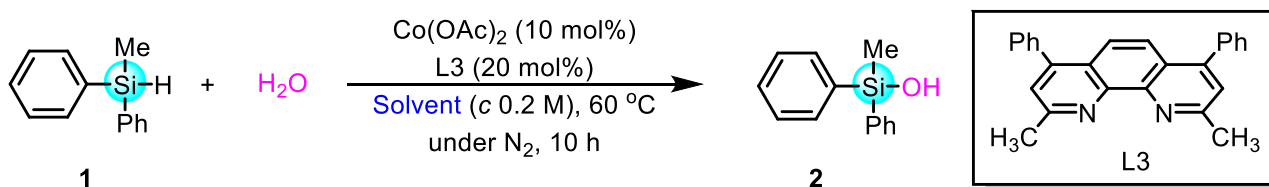

| Entry <sup>a</sup> | Solvent            | Yield <sup>b</sup> |
|--------------------|--------------------|--------------------|
| 1                  | Et <sub>2</sub> O  | 11%                |
| 2                  | DCM                | trace              |
| 3                  | EA                 | trace              |
| 4                  | 1,4-dioxane        | 100%(94%)          |
| 5                  | DCE                | trace              |
| 6                  | CH <sub>3</sub> CN | 67%                |
| 7                  | THF                | 87%                |
| 8 <sup>c</sup>     | 1,4-dioxane        | 73%                |

<sup>a</sup> Reaction conditions: **1** (0.2 mmol, 1.0 equiv.), H<sub>2</sub>O (0.4 mmol, 2.0 equiv.), Co(OAc)<sub>2</sub> (0.02 mmol, 10 mol%) and **L3** (0.04 mmol, 20 mol%) were added to solvent (*c* 0.2 M) under nitrogen atmosphere for 10 h. <sup>b</sup> The yield was given with

CH<sub>2</sub>Br<sub>2</sub> as the internal standard and the isolated yield was given in the parentheses. <sup>c</sup> Reaction time = 5 h.

### 2.1.3 Optimization of gram-scaled hydroxylation reaction

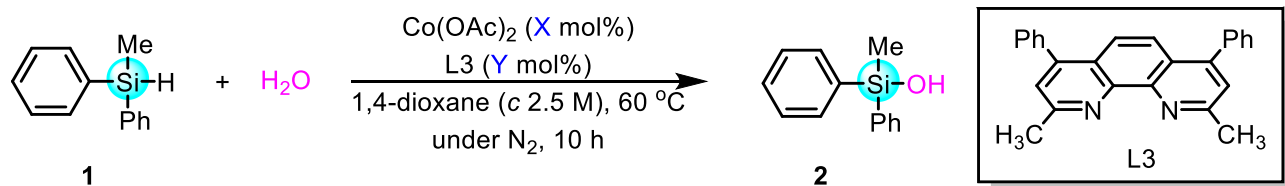

| Entry <sup>a</sup> | X   | Y  | Yield <sup>b</sup> |
|--------------------|-----|----|--------------------|
| 1                  | 0.5 | 1  | 62%                |
| 2                  | 1   | 2  | 74%                |
| 3                  | 10  | 20 | 77%                |
| 4 <sup>c</sup>     | 10  | 20 | 58%                |
| 5 <sup>c,d</sup>   | 0.5 | 1  | 100% (97%)         |
| 6 <sup>c,d</sup>   | -   | 1  | N.R.               |
| 7 <sup>c,d</sup>   | 0.5 | -  | N.R.               |

<sup>a</sup> Reaction conditions: **1** (5 mmol, 1.0 equiv.), H<sub>2</sub>O (10.0 mmol, 2.0 equiv.), Co(OAc)<sub>2</sub> and **L3** were added to 1,4-dioxane (*c* 2.5 M) under nitrogen atmosphere for 10 h. <sup>b</sup> The yield was given with CH<sub>2</sub>Br<sub>2</sub> as the internal standard and the isolated yield was given in the parentheses. <sup>c</sup> Under air. <sup>d</sup> 80 °C.

## 2.2 Optimization for the preparation of disiloxane

### 2.2.1 The ratio of Co(acac)<sub>2</sub> and ligand L4

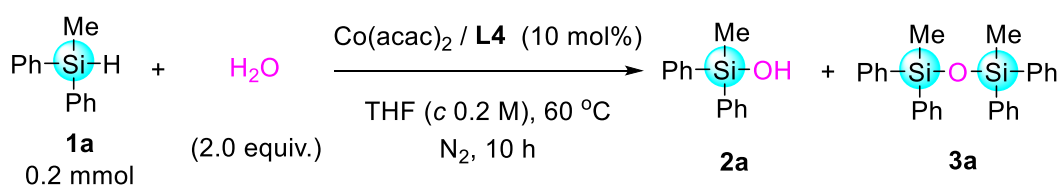

| entry | Co(acac) <sub>2</sub> / <b>L4</b> | yield ( <b>2a</b> ) | yield ( <b>3a</b> ) |
|-------|-----------------------------------|---------------------|---------------------|
| 1     | 1.0 : 1.0                         | 30%                 | trace               |
| 2     | 1.0 : 1.5                         | 19%                 | 55%                 |
| 3     | 1.0 : 2.0                         | trace               | 89%                 |

<sup>a</sup> Reaction conditions: **1a** (0.2 mmol, 1.0 equiv.), H<sub>2</sub>O (0.4 mmol, 2.0 equiv.), Co(acac)<sub>2</sub> and **L4** were added to THF (*c* 0.2 M) under N<sub>2</sub> for 10 h. <sup>b</sup> The yield was given with CH<sub>2</sub>Br<sub>2</sub> as the internal standard.

## 2.2.2 Optimization of gram-scale preparation

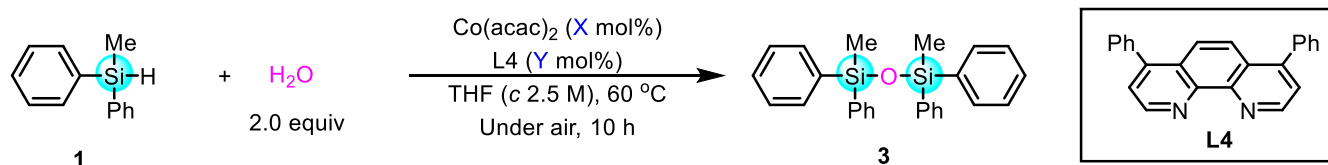

| Entry <sup>a</sup> | X   | Y  | 3 <sup>b</sup> |
|--------------------|-----|----|----------------|
| 1                  | 0.5 | 1  | 58%            |
| 2                  | 1   | 2  | 70%            |
| 3                  | 5   | 10 | 86%            |
| 4                  | 10  | 20 | 88%            |
| 5 <sup>c</sup>     | 5   | 10 | 100% (93%)     |
| 6 <sup>c</sup>     | -   | 10 | N.P.           |
| 7 <sup>c</sup>     | 5   | -  | N.P.           |

<sup>a</sup> Reaction conditions: **1** (5 mmol, 1.0 equiv.), H<sub>2</sub>O (10.0 mmol, 2.0 equiv.), Co(acac)<sub>2</sub> and **L4** were added to THF (*c* 2.5 M) under air for 10 h. <sup>b</sup> The yield was given with CH<sub>2</sub>Br<sub>2</sub> as the internal standard and the isolated yield was given in the parentheses. <sup>c</sup> Reaction time = 24 h.

## 2.3 Screening of Mn or Fe as the precatalyst

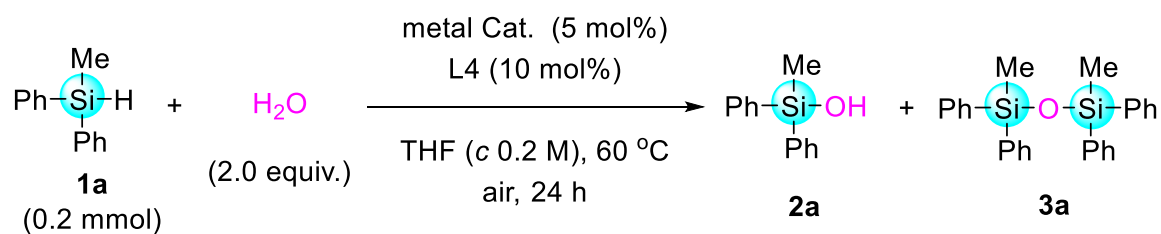

| Entry <sup>a</sup> | metal cat.                               | starting material <sup>b</sup> | yield ( <b>2a</b> ) <sup>b</sup> | yield ( <b>3a</b> ) <sup>b</sup> |
|--------------------|------------------------------------------|--------------------------------|----------------------------------|----------------------------------|
| 1                  | Fe(acac) <sub>2</sub>                    | 86%                            | 0%                               | 0%                               |
| 2                  | Fe(acac) <sub>3</sub>                    | 84%                            | 0%                               | 0%                               |
| 3                  | Mn(acac) <sub>2</sub> ·2H <sub>2</sub> O | 78%                            | 10%                              | 3%                               |
| 4                  | Mn(acac) <sub>3</sub>                    | 94%                            | 0%                               | 0%                               |
| 5                  | Fe(OAc) <sub>2</sub>                     | 100%                           | 0%                               | 0%                               |
| 6                  | Mn(OAc) <sub>2</sub> ·2H <sub>2</sub> O  | 94%                            | 0%                               | 0%                               |

<sup>a</sup> Reaction conditions: **1a** (0.2 mmol, 1.0 equiv.), H<sub>2</sub>O (0.4 mmol, 2.0 equiv.), Metal catalyst and **L4** were added to THF (*c* 0.2 M) under air for 24 h. <sup>b</sup> The yield was given with CH<sub>2</sub>Br<sub>2</sub> as the internal standard.

## 3. General Procedures



### **General Procedure 1 (GP 1) - *Co-catalyzed the synthesis of silanols***

To a 10 mL flame-dried Schlenk tube with a stir bar was added silanes (5 mmol), Co(OAc)<sub>2</sub> (0.5 mol%), and **L3** (1 mol%). H<sub>2</sub>O (175 µL) and 1,4-dioxane (2.5 M) were added *via* syringe at 80 °C (oil bath) under air for 10 h. After that, the reaction mixture was directly concentrated by rotary evaporation. The hydroxylated products were isolated by silica column chromatography (typically 10% of ethyl acetate in petroleum ether).

### **General Procedure 2 (GP 2) - *Co-catalyzed the synthesis of disiloxanes***

To a 10 mL flame-dried Schlenk tube with a stirring bar was added silane (5 mmol), Co(acac)<sub>2</sub> (5 mol%), **L4** (10 mol%), H<sub>2</sub>O (10 mmol) and THF (2.5 M) at 60 °C (oil bath) under air for 24 h. After that, the reaction mixture was directly concentrated by rotary evaporation. The disiloxane products were isolated by silica column chromatography (typically 10% of ethyl acetate in petroleum ether).

### **General Procedure 3 (GP 3) - *Co-catalyzed the synthesis of alkyloxylsilanes***

To a 10 mL flame-dried Schlenk tube with a stirring bar was added silane (5 mmol), Co(OAc)<sub>2</sub> (0.5 mol%), **L3** (1 mol%), and related alcohols (2.5 M) as solvent at 60 °C (oil bath) under air for 10 h. After that, the reaction mixture was directly concentrated by rotary evaporation. The alkoxyolate products were isolated by silica column chromatography (typically 10% of ethyl acetate in petroleum ether).

## 4. Characterization of Products

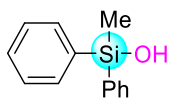

### 2a, Methyldiphenylsilanol<sup>[1]</sup>

Synthesized according to **GP 1**. Purification via column chromatography (petroleum ether/ethyl acetate = 10:1) afforded 1.04 g (97% yield) of the desired product as a colorless oil.

<sup>1</sup>H NMR (500 MHz, Chloroform-*d*) δ 7.65 – 7.61 (m, 4H), 7.48 – 7.44 (m, 2H), 7.43 – 7.38 (m, 4H), 2.99 (br s, 1H), 0.67 (s, 3H).

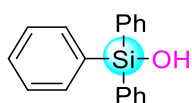

### 2b, Triphenylsilanol<sup>[1]</sup>

Synthesized according to **GP 1**. Purification via column chromatography (petroleum ether/ethyl acetate = 10:1) afforded 1.30 g (94% yield) of the desired product as a white solid.

<sup>1</sup>H NMR (500 MHz, Chloroform-*d*) δ 7.66 – 7.62 (m, 6H), 7.48 – 7.42 (m, 3H), 7.41 – 7.37 (m, 6H), 2.50 (br s, 1H).

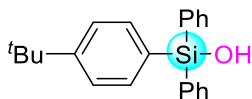

### 2c, (4-(tert-butyl)phenyl)diphenylsilanol<sup>[2]</sup>

Synthesized according to **GP 1**. Purification via column chromatography (petroleum ether/ethyl acetate = 10:1) afforded 1.30 g (78% yield) of the desired product as a white solid.

<sup>1</sup>H NMR (400 MHz, Chloroform-*d*) δ 7.66 (d, *J* = 7.1 Hz, 4H), 7.58 (d, *J* = 7.5 Hz, 2H), 7.48 – 7.35 (m, 8H), 2.63 (br s, 1H), 1.34 (s, 9H).

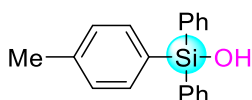

### 2d, diphenyl(*p*-tolyl)silanol<sup>[2]</sup>

Synthesized according to **GP 1**. Purification via column chromatography (petroleum ether/ethyl acetate = 10:1) afforded 1.26 g (87% yield) of the desired product as a white solid.

<sup>1</sup>H NMR (500 MHz, Chloroform-*d*) δ 7.61 – 7.54 (m, 4H), 7.52 – 7.44 (m, 2H), 7.43 – 7.33 (m, 2H), 7.35 – 7.27 (m, 4H), 7.17 – 7.11 (m, 2H), 2.99 (br s, 1H), 2.33 (s, 3H).

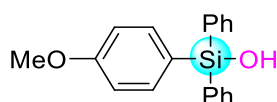

**2e**, (4-methoxyphenyl)diphenylsilanol<sup>[2]</sup>

Synthesized according to **GP 1**. Purification via column chromatography (petroleum ether/ethyl acetate = 10:1) afforded 1.50 g (98% yield) of the desired product as a white solid.

<sup>1</sup>H NMR (400 MHz, Chloroform-*d*) δ 7.63 (d, *J* = 7.4 Hz, 4H), 7.55 (d, *J* = 7.8 Hz, 2H), 7.49 – 7.34 (m, 6H), 6.94 (d, *J* = 7.8 Hz, 2H), 3.83 (s, 3H), 2.39 (br s, 1H).

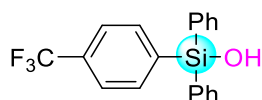

**2f**, diphenyl(4-(trifluoromethyl)phenyl)silanol<sup>[2]</sup>

Synthesized according to **GP 1**. Purification via column chromatography (petroleum ether/ethyl acetate = 10:1) afforded 1.50 g (88% yield) of the desired product as a colorless oil.

<sup>1</sup>H NMR (400 MHz, Chloroform-*d*) δ 7.73 (d, *J* = 7.8 Hz, 2H), 7.59 (dd, *J* = 8.2, 4.1 Hz, 6H), 7.48 (t, *J* = 7.5 Hz, 2H), 7.39 (t, *J* = 7.4 Hz, 4H), 3.54 (br s, 1H).

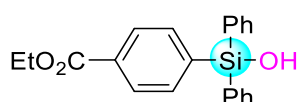

**2g**, ethyl 4-(hydroxydiphenylsilyl)benzoate<sup>[2]</sup>

Synthesized according to **GP 1**. Purification via column chromatography (petroleum ether/ethyl acetate = 10:1) afforded 1.60 g (92% yield) of the desired product as a colorless oil.

<sup>1</sup>H NMR (400 MHz, Chloroform-*d*) δ 8.00 (d, *J* = 8.3 Hz, 2H), 7.71 (d, *J* = 8.3 Hz, 2H), 7.63 (dd, *J* = 8.0, 1.4 Hz, 4H), 7.49 – 7.42 (m, 2H), 7.41 – 7.33 (m, 4H), 4.38 (br s, 1H), 4.36 (q, *J* = 7.1 Hz, 2H), 1.39 (t, *J* = 7.1 Hz, 3H).

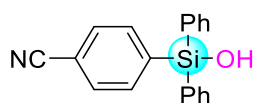

**2h**, 4-(hydroxydiphenylsilyl)benzonitrile<sup>[2]</sup>

Synthesized according to **GP 1**. Purification via column chromatography (petroleum ether/ethyl acetate = 10:1) afforded 1.37 g (91% yield) of the desired product as a colorless oil.

<sup>1</sup>H NMR (500 MHz, Chloroform-*d*) δ 7.73 – 7.69 (m, 2H), 7.59 (dd, *J* = 8.1, 1.4 Hz, 4H), 7.55 (d, *J* = 8.2 Hz, 2H), 7.51 – 7.44 (m, 2H), 7.42 – 7.35 (m, 4H), 4.13 (br s, 1H).

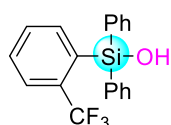

**2i**, diphenyl(2-(trifluoromethyl)phenyl)silanol

Synthesized according to **GP 1**. Purification via column chromatography (petroleum ether/ethyl acetate = 10:1) afforded 1.90 g (99% yield) of the desired product as a colorless oil.

$^1\text{H NMR}$  (400 MHz, Chloroform-*d*)  $\delta$  7.80 (d,  $J = 7.8$  Hz, 1H), 7.65 (d,  $J = 7.4$  Hz, 1H), 7.62 – 7.54 (m, 5H), 7.53 – 7.44 (m, 3H), 7.41 (t,  $J = 7.2$  Hz, 4H), 2.93 (br s, 1H).  $^{13}\text{C NMR}$  (126 MHz, Chloroform-*d*)  $\delta$  138.1, 135.3 (q,  $J = 31.1$  Hz), 135.1, 134.9, 133.5, 130.8, 130.2, 130.1, 127.9, 126.3 (q,  $J = 5.2$  Hz), 124.9 (q,  $J = 274.3$  Hz).  $^{19}\text{F NMR}$  (471 MHz, Chloroform-*d*)  $\delta$  -57.4. **IR** (neat,  $\text{cm}^{-1}$ ): 3061 (br), 1112 (s), 699 (s), 500 (s), 822 (m); **HRMS (ESI)**  $m/z$ :  $[\text{M}+\text{Na}]^+$  Calcd. for  $\text{C}_{19}\text{H}_{15}\text{F}_3\text{NaOSi}$ : 367.0736; Found: 367.0733.

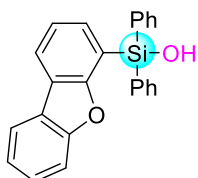

**2j**, dibenzo[b,d]furan-4-ylidiphenylsilanol<sup>[2]</sup>

Synthesized according to **GP 1**. Purification via column chromatography (petroleum ether/ethyl acetate = 10:1) afforded 1.57 g (86% yield) of the desired product as a white solid.

$^1\text{H NMR}$  (500 MHz, Chloroform-*d*)  $\delta$  8.10 (dd,  $J = 7.7, 1.4$  Hz, 1H), 8.03 – 7.98 (m, 1H), 7.83 – 7.77 (m, 4H), 7.59 (dd,  $J = 7.2, 1.3$  Hz, 1H), 7.54 – 7.49 (m, 3H), 7.48 – 7.43 (m, 5H), 7.42 – 7.36 (m, 2H), 3.66 (br s, 1H).

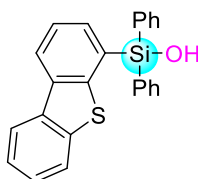

**2k**, dibenzo[b,d]thiophen-4-ylidiphenylsilanol<sup>[2]</sup>

Synthesized according to **GP 1**. Purification via column chromatography (petroleum ether/ethyl acetate = 10:1) afforded 1.81 g (95% yield) of the desired product as a white solid.

$^1\text{H NMR}$  (500 MHz, Chloroform-*d*)  $\delta$  8.26 (dd,  $J = 7.9, 1.2$  Hz, 1H), 8.17 (dd,  $J = 7.0, 1.9$  Hz, 1H), 7.76 (dd,  $J = 6.9, 1.6$  Hz, 1H), 7.71 (dd,  $J = 8.0, 1.3$  Hz, 4H), 7.65 – 7.61 (m, 1H), 7.52 – 7.38 (m, 9H), 2.88 (br s, 1H).

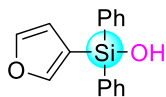

**2l**, furan-3-ylidiphenylsilanol

Synthesized according to **GP 1**. Purification via column chromatography (petroleum ether/ethyl acetate = 10:1) afforded 1.31 g (98% yield) of the desired product as a white solid.

$^1\text{H NMR}$  (400 MHz, Chloroform-*d*)  $\delta$  7.75 – 7.62 (m, 4H), 7.56 (t,  $J = 1.6$  Hz, 1H), 7.51 – 7.36 (m, 7H), 6.51 (dd,  $J = 1.8, 0.8$  Hz, 1H), 3.08 (br s, 1H).  $^{13}\text{C NMR}$  (126 MHz, Chloroform-*d*)  $\delta$  150.3, 143.2, 135.2, 134.5, 130.1, 127.9, 114.7, 113.6. **IR** (neat,  $\text{cm}^{-1}$ ): 3291 (br), 1121 (s), 827 (m), 704 (s), 499 (s). **HRMS (ESI)**  $m/z$ :  $[\text{M}+\text{Na}]^+$  Calcd. for  $\text{C}_{16}\text{H}_{14}\text{NaO}_2\text{Si}$ : 289.0655; Found: 289.0652.

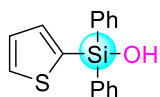

**2m**, diphenyl(thiophen-2-yl)silanol<sup>[3]</sup>

Synthesized according to **GP 1**. Purification via column chromatography (petroleum ether/ethyl acetate = 10:1) afforded 1.40 g (99% yield) of the desired product as a white solid.

<sup>1</sup>H NMR (400 MHz, Chloroform-*d*) δ 7.80 – 7.67 (m, 5H), 7.54 – 7.47 (m, 2H), 7.47 – 7.39 (m, 5H), 7.27 (dd, *J* = 4.6, 3.3 Hz, 1H), 2.90 (br s, 1H).

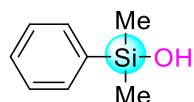

**2n**, dimethyl(phenyl)silanol<sup>[1]</sup>

Synthesized according to **GP 1**. Purification via column chromatography (petroleum ether/ethyl acetate = 10:1) afforded 0.58 g (76% yield) of the desired product as a colorless oil.

<sup>1</sup>H NMR (400 MHz, Chloroform-*d*) δ 7.60 (d, *J* = 7.3 Hz, 2H), 7.44 – 7.35 (m, 3H), 2.25 (br s, 1H), 0.41 (s, 6H).

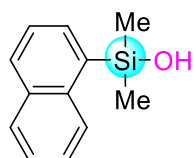

**2o**, dimethyl(naphthalen-1-yl)silanol<sup>[1]</sup>

Synthesized according to **GP 1**. Purification via column chromatography (petroleum ether/ethyl acetate = 10:1) afforded 0.71 g (70% yield) of the desired product as a white solid.

<sup>1</sup>H NMR (400 MHz, Chloroform-*d*) δ 8.43 – 8.35 (m, 1H), 7.96 (dd, *J* = 8.8, 3.2 Hz, 2H), 7.85 (d, *J* = 6.8 Hz, 1H), 7.64 – 7.56 (m, 2H), 7.56 – 7.48 (m, 1H), 3.93 (br s, 1H), 0.63 (s, 6H).

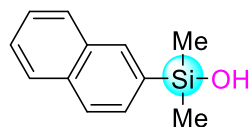

**2p**, dimethyl(naphthalen-2-yl)silanol<sup>[1]</sup>

Synthesized according to **GP 1**. Purification via column chromatography (petroleum ether/ethyl acetate = 10:1) afforded 0.79 g (78% yield) of the desired product as a colorless oil.

<sup>1</sup>H NMR (400 MHz, Chloroform-*d*) δ 8.11 (s, 1H), 7.90 – 7.81 (m, 3H), 7.66 (d, *J* = 8.1 Hz, 1H), 7.56 – 7.47 (m, 2H), 2.78 (br s, 1H), 0.49 (s, 6H).

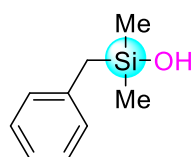

## 2q, Benzyldimethylsilanol<sup>[1]</sup>

Synthesized according to **GP 1**. Purification via column chromatography (petroleum ether/ethyl acetate = 10:1) afforded 0.76 g (91% yield) of the desired product as a colorless oil.

<sup>1</sup>H NMR (400 MHz, Chloroform-*d*) δ 7.28 – 7.20 (m, 2H), 7.13 – 7.02 (m, 3H), 2.18 (s, 2H), 1.67 (br s, 1H), 0.14 (s, 6H).

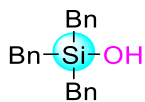

## 2r, Tribenzylsilanol

Synthesized according to **GP 1**. Purification via column chromatography (petroleum ether/ethyl acetate = 10:1) afforded 1.42 g (89% yield) of the desired product as a white solid.

<sup>1</sup>H NMR (400 MHz, Chloroform-*d*) δ 7.28 – 7.20 (m, 6H), 7.14 (d, *J* = 7.3 Hz, 3H), 7.01 (d, *J* = 7.4 Hz, 6H), 2.19 (s, 6H), 1.75 (br s, 1H). <sup>13</sup>C NMR (101 MHz, Chloroform-*d*) δ 137.9, 128.50, 128.47, 124.6, 24.0. IR (neat, cm<sup>-1</sup>): 3613 (br), 776 (m), 733 (s), 698 (s), 477 (m); HRMS (ESI) *m/z*: [M+Na]<sup>+</sup> Calcd. for C<sub>21</sub>H<sub>22</sub>NaO: 341.1332; Found: 341.1327.

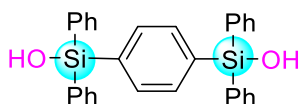

## 2s, 1,4-phenylenebis(diphenylsilanol)<sup>[2]</sup>

Synthesized according to **GP 1**. Purification via column chromatography (petroleum ether/ethyl acetate = 10:1) afforded 1.35 g (57% yield) of the desired product as a white solid.

<sup>1</sup>H NMR (400 MHz, Chloroform-*d*) δ 7.70 – 7.56 (m, 12H), 7.48 – 7.33 (m, 12H), 2.51 (br s, 2H). <sup>13</sup>C NMR (101 MHz, DMSO-*d*<sub>6</sub>) δ 138.1, 136.3, 134.5, 133.7, 129.7, 127.8.

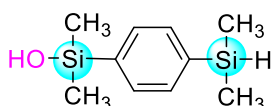

## 2t, (4-(dimethylsilyl)phenyl)dimethylsilanol

Synthesized according to **GP 1**. Purification via column chromatography (petroleum ether/ethyl acetate = 10:1) afforded 0.50 g (48% yield) of the desired product as a colorless oil.

<sup>1</sup>H NMR (400 MHz, Chloroform-*d*) δ 7.65 – 7.56 (m, 4H), 4.48 (p, *J* = 3.7 Hz, 1H), 2.76 (br s, 1H), 0.42 (s, 6H), 0.40 (d, *J* = 3.7 Hz, 6H). <sup>13</sup>C NMR (101 MHz, Chloroform-*d*) δ 140.0, 139.0, 133.4, 132.4, -0.1, -3.9. IR (neat, cm<sup>-1</sup>): 3269 (br), 2121 (m), 868 (s), 826 (s), 772 (s); RMS (EI-QTOF) *m/z*: [M]<sup>+</sup> Calcd. for C<sub>10</sub>H<sub>18</sub>OSi<sub>2</sub>: 210.0896; Found: 210.0899.

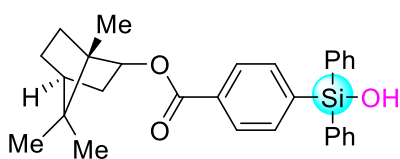

from (-)-bornel

## 2u, (1S,2S,4S)-1,7,7-trimethylbicyclo[2.2.1]heptan-2-yl 4-(hydroxydiphenylsilyl)benzoate<sup>[2]</sup>

Synthesized according to **GP 1**. Purification via column chromatography (petroleum ether/ethyl acetate = 10:1) afforded 2.00 g (88% yield, dr > 20:1) of the desired product as white solid.

$^1\text{H NMR}$  (400 MHz, Chloroform-*d*)  $\delta$  8.04 (d,  $J = 7.9$  Hz, 2H), 7.73 (d,  $J = 7.9$  Hz, 2H), 7.62 (d,  $J = 7.1$  Hz, 4H), 7.46 (t,  $J = 7.2$  Hz, 2H), 7.39 (t,  $J = 7.4$  Hz, 4H), 5.16 – 5.06 (m, 1H), 3.26 (br s, 1H), 2.54 – 2.40 (m, 1H), 2.20 – 2.05 (m, 1H), 1.87 – 1.76 (m, 1H), 1.74 (t,  $J = 4.4$  Hz, 1H), 1.49 – 1.35 (m, 1H), 1.35 – 1.24 (m, 1H), 1.11 (dd,  $J = 13.8, 3.3$  Hz, 1H), 0.97 (s, 3H), 0.92 (d,  $J = 4.5$  Hz, 6H).

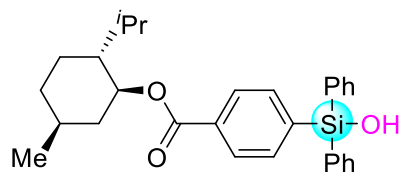

from L-menthol

**2w**, (1S,2R,5S)-2-isopropyl-5-methylcyclohexyl 4-(hydroxydiphenylsilyl)benzoate<sup>[2]</sup>

Synthesized according to **GP 1**. Purification via column chromatography (petroleum ether/ethyl acetate = 10:1) afforded 2.02 g (88% yield, dr > 20:1) of the desired product as white solid.

$^1\text{H NMR}$  (400 MHz, Chloroform-*d*)  $\delta$  8.02 (d,  $J = 8.1$  Hz, 2H), 7.72 (d,  $J = 8.1$  Hz, 2H), 7.66 – 7.58 (m, 4H), 7.46 (t,  $J = 7.3$  Hz, 2H), 7.39 (t,  $J = 7.3$  Hz, 4H), 4.95 (td,  $J = 10.8, 4.3$  Hz, 1H), 3.38 (br s, 1H), 2.21 – 2.06 (m, 1H), 1.97 (pd,  $J = 6.9, 2.5$  Hz, 1H), 1.80 – 1.69 (m, 2H), 1.21 – 1.05 (m, 2H), 0.90 – 0.97 (m, 2H), 0.94 (m, 7H), 0.80 (d,  $J = 6.9$  Hz, 3H).

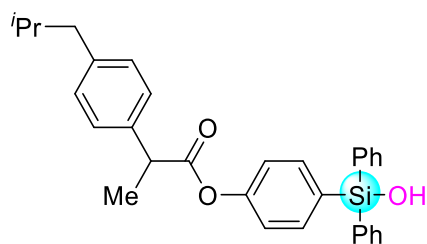

from ibuprofen

**2w**, 4-(hydroxydiphenylsilyl)phenyl 2-(4-isobutylphenyl)propanoate<sup>[2]</sup>

Synthesized according to **GP 1**. Purification via column chromatography (petroleum ether/ethyl acetate = 10:1) afforded 1.79 g (74% yield) of the desired product as a colorless oil.

$^1\text{H NMR}$  (400 MHz, Chloroform-*d*)  $\delta$  7.64 – 7.56 (m, 6H), 7.48 – 7.41 (m, 2H), 7.38 (t,  $J = 7.2$  Hz, 4H), 7.30 (d,  $J = 8.0$  Hz, 2H), 7.14 (d,  $J = 8.0$  Hz, 2H), 7.03 (d,  $J = 8.4$  Hz, 2H), 3.95 (q,  $J = 7.1$  Hz, 1H), 2.64 (br s, 1H), 2.48 (d,  $J = 7.2$  Hz, 2H), 1.95 – 1.79 (m, 1H), 1.61 (d,  $J = 7.1$  Hz, 3H), 0.92 (d,  $J = 6.6$  Hz, 6H).

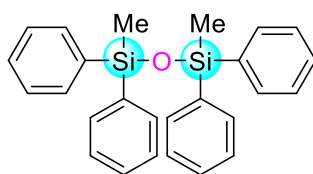

**3a**, 1,3-dimethyl-1,1,3,3-tetraphenyldisiloxane<sup>[4]</sup>

Synthesized according to **GP 2**. Purification via column chromatography (petroleum ether/ethyl acetate = 10:1) afforded 0.95 g (93% yield) of the desired product as a colorless oil.

$^1\text{H NMR}$  (400 MHz, Chloroform-*d*)  $\delta$  7.67 – 7.54 (m, 8H), 7.40 (d,  $J$  = 6.9 Hz, 12H), 0.67 (s, 6H).

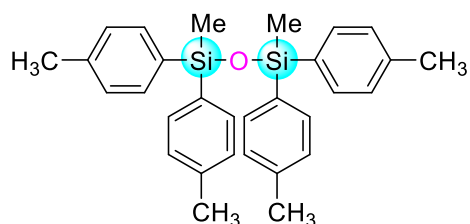

**3b**, 1,1,3,3-tetra-p-tolyldisiloxane<sup>[5]</sup>

Synthesized according to **GP 2**. Purification via column chromatography (petroleum ether/ethyl acetate = 10:1) afforded 1.00 g (87% yield) of the desired product as a colorless oil.

$^1\text{H NMR}$  (500 MHz, Chloroform-*d*)  $\delta$  7.95 – 7.78 (m, 8H), 7.58 – 7.42 (m, 8H), 2.69 (s, 12H), 0.99 (s, 6H).  $^{13}\text{C NMR}$  (126 MHz, Chloroform-*d*)  $\delta$  139.2 , 134.4 , 134.1 , 128.5 , 21.5 , -0.3.

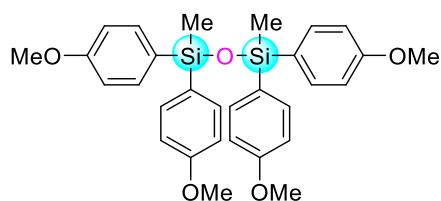

**3c**, 1,1,3,3-tetrakis(4-methoxyphenyl)-1,3-dimethyldisiloxane

Synthesized according to **GP 2**. Purification via column chromatography (petroleum ether/ethyl acetate = 10:1) afforded 0.58 g (44% yield) of the desired product as a white solid.

$^1\text{H NMR}$  (400 MHz, Chloroform-*d*)  $\delta$  7.50 (d,  $J$  = 8.4 Hz, 8H), 6.92 (d,  $J$  = 8.4 Hz, 8H), 3.85 (s, 12H), 0.58 (s, 6H).  $^{13}\text{C NMR}$  (101 MHz, Chloroform-*d*)  $\delta$  160.7 , 135.5 , 129.1 , 113.4 , 54.9 , -0.2 . **IR** (neat,  $\text{cm}^{-1}$ ): 1590 (s), 1029 (s), 799 (s), 520 (m); **HRMS (ESI)**  $m/z$ :  $[\text{M}+\text{Na}]^+$  Calcd. for  $\text{C}_{30}\text{H}_{34}\text{NaO}_5\text{Si}_2$ : 553.1837; Found: 553.1836.

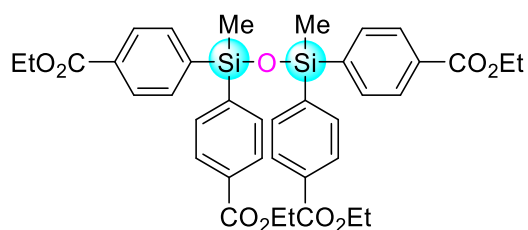

**3d**, tetraethyl 4,4',4'',4'''-(1,3-dimethyldisiloxane-1,1,3,3-tetrayl)tetrabenzoate

Synthesized according to **GP 2**. Purification via column chromatography (petroleum ether/ethyl acetate = 10:1) afforded 1.43 g (82% yield) of the desired product as a colorless oil.

$^1\text{H NMR}$  (500 MHz, Chloroform-*d*)  $\delta$  7.99 (d,  $J$  = 8.2 Hz, 8H), 7.57 (d,  $J$  = 8.2 Hz, 8H), 4.33 (q,  $J$  = 7.1 Hz, 8H), 1.33 (t,  $J$  = 7.2 Hz, 12H), 0.64 (s, 6H).  $^{13}\text{C NMR}$  (126 MHz, Chloroform-*d*)  $\delta$  166.0 , 141.8 , 133.6 , 131.6 , 128.5 , 60.7 , 14.0 , -1.2 . **IR** (neat,  $\text{cm}^{-1}$ ): 2980 (br), 1715 (s), 1267 (s), 1085 (s), 739 (s); **HRMS (ESI)**  $m/z$ :  $[\text{M}+\text{H}]^+$  Calcd. for  $\text{C}_{38}\text{H}_{42}\text{O}_9\text{Si}_2$ : 699.2440; Found: 699.2437.



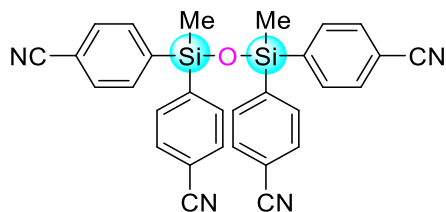

**3e**, 4,4',4'',4'''-(1,3-dimethyldisiloxane-1,1,3,3-tetrayl)tetrabenzonitrile

Synthesized according to **GP 2**. Purification via column chromatography (petroleum ether/ethyl acetate = 3:1) afforded 0.90 g (70% yield) of the desired product as a colorless oil.

$^1\text{H NMR}$  (400 MHz, Chloroform-*d*)  $\delta$  7.63 (d,  $J = 7.8$  Hz, 8H), 7.53 (d,  $J = 7.8$  Hz, 8H), 0.66 (s, 6H).  $^{13}\text{C NMR}$  (101 MHz, Chloroform-*d*)  $\delta$  141.4, 134.1, 131.5, 118.2, 114.2, -1.2. **IR** (neat,  $\text{cm}^{-1}$ ): 2228 (m), 1386 (m), 1060 (s), 794 (s), 557 (s). **HRMS (ESI)**  $m/z$ :  $[\text{M}+\text{Na}]^+$  Calcd. for  $\text{C}_{30}\text{H}_{22}\text{N}_4\text{NaOSi}_2$ : 533.1224; Found: 533.1228.

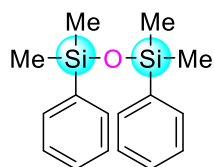

**3f**, 1,1,3,3-tetramethyl-1,3-diphenyldisiloxane<sup>[4]</sup>

Synthesized according to **GP 2**. Purification via column chromatography (petroleum ether/ethyl acetate = 10:1) afforded 0.23 g (32% yield) of the desired product as a colorless oil.

$^1\text{H NMR}$  (400 MHz, Chloroform-*d*)  $\delta$  7.78 – 7.69 (m, 4H), 7.57 – 7.47 (m, 6H), 0.52 (s, 12H).

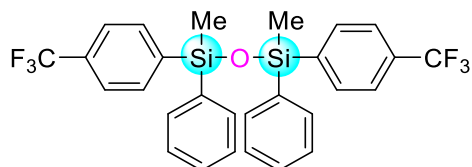

**3g**, 1,3-dimethyl-1,3-diphenyl-1,3-bis(4-(trifluoromethyl)phenyl)disiloxane

$^1\text{H NMR}$  (400 MHz, Chloroform-*d*)  $\delta$  7.61 (d,  $J = 7.8$  Hz, 4H), 7.56 (d,  $J = 7.9$  Hz, 4H), 7.53 – 7.47 (m, 4H), 7.47 – 7.40 (m, 2H), 7.39 – 7.32 (m, 4H), 0.64 (s, 6H).  $^{19}\text{F NMR}$  (376 MHz, Chloroform-*d*)  $\delta$  -62.98.  $^{13}\text{C NMR}$  (101 MHz, Chloroform-*d*)  $\delta$  142.04, 136.15, 134.17, 133.85, 131.57 (q,  $J = 32.2$  Hz), 130.12, 128.00, 124.35 (q,  $J = 3.8$  Hz), 124.09 (q,  $J = 272.3$  Hz), -0.80. **IR** (neat,  $\text{cm}^{-1}$ ): 1322 (s), 1163 (m), 1117 (s), 1053 (s), 790 (m); **RMS (EI-QTOF)**  $m/z$ :  $[\text{M}]^+$  Calcd. for  $\text{C}_{28}\text{H}_{24}\text{OF}_6\text{Si}_2$ : 546.1270; Found: 546.1270.

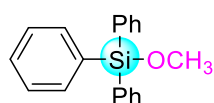

**4a**, Methoxytriphenylsilane<sup>[2]</sup>

Synthesized according to **GP 3**. Purification via column chromatography (petroleum ether/ethyl acetate = 10:1) afforded 1.38 g (95% yield) of the desired product as a colorless oil. The gram-scale reaction was run on a 20.0 mmol scale and the desired product **4a** was obtained in 83% yield (3.80 g).

$^1\text{H NMR}$  (400 MHz, Chloroform-*d*)  $\delta$  7.81 – 7.73 (m, 6H), 7.59 – 7.45 (m, 9H), 3.77 (s, 3H).

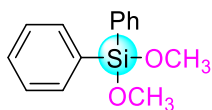

#### **4b**, Dimethoxydiphenylsilane<sup>[6]</sup>

Synthesized according to **GP 3**. Purification via column chromatography (petroleum ether/ethyl acetate = 10:1) afforded 0.66 g (54% yield) of the desired product as a colorless oil.

$^1\text{H NMR}$  (400 MHz, Benzene-*d*<sub>6</sub>)  $\delta$  7.83 – 7.77 (m, 4H), 7.22 – 7.16 (m, 6H), 3.45 (s, 6H).

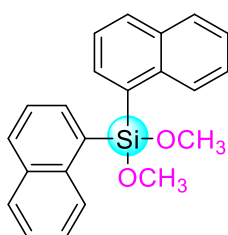

#### **4c**, dimethoxydi(naphthalen-1-yl)silane<sup>[7]</sup>

Synthesized according to **GP 1**. Purification via column chromatography (petroleum ether/ethyl acetate = 10:1) afforded 1.48 g (86% yield) of the desired product as a white solid.

$^1\text{H NMR}$  (400 MHz, Chloroform-*d*)  $\delta$  8.33 (d, *J* = 7.7 Hz, 2H), 8.06 (d, *J* = 6.7 Hz, 2H), 7.94 (d, *J* = 8.2 Hz, 2H), 7.87 – 7.80 (m, 2H), 7.54 – 7.47 (m, 2H), 7.47 – 7.38 (m, 4H), 3.65 (s, 6H).

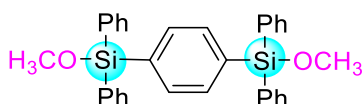

#### **4d**, 1,4-bis(methoxydiphenylsilyl)benzene

Synthesized according to **GP 1**. Purification via column chromatography (petroleum ether/ethyl acetate = 10:1) afforded 1.00 g (40% yield) of the desired product as a white solid.

$^1\text{H NMR}$  (400 MHz, Chloroform-*d*)  $\delta$  7.68 – 7.59 (m, 12H), 7.50 – 7.34 (m, 12H), 3.64 (s, 6H).  $^{13}\text{C NMR}$  (101 MHz, Chloroform-*d*)  $\delta$  135.9, 135.4, 134.6, 133.7, 130.1, 127.9, 51.9. **IR** (neat,  $\text{cm}^{-1}$ ): 3054 (br), 1082 (s), 696 (s), 531 (s). **HRMS (ESI)** *m/z*:  $[\text{M}+\text{H}]^+$  Calcd. for  $\text{C}_{32}\text{H}_{31}\text{O}_2\text{Si}_2$ : 503.1857; Found: 503.1859.

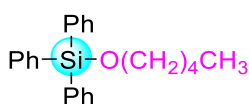

#### **4e**, (pentyloxy)triphenylsilane

Synthesized according to **GP 1**. Purification via column chromatography (petroleum ether/ethyl acetate = 10:1) afforded 0.85 g (49% yield) of the desired product as a colorless oil.

**<sup>1</sup>H NMR** (400 MHz, Chloroform-*d*)  $\delta$  7.78 – 7.57 (m, 6H), 7.56 – 7.33 (m, 9H), 3.94 – 3.67 (m, 2H), 1.76 – 1.55 (m, 2H), 1.46 – 1.15 (m, 4H), 1.02 – 0.78 (m, 3H). **<sup>13</sup>C NMR** (101 MHz, Chloroform-*d*)  $\delta$  135.4 , 134.5 , 129.9 , 127.8 , 64.0 , 32.2 , 27.9 , 22.4 , 14.1 . **IR** (neat, cm<sup>-1</sup>): 2933 (br), 1429 (m), 1099 (s), 701 (s), 505 (s). **HRMS (ESI)** m/z: [M+H]<sup>+</sup> Calcd. for C<sub>23</sub>H<sub>27</sub>OSi: 347.1826; Found: 347.1824.

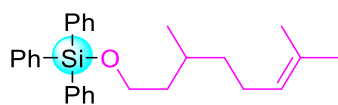

**4f**, ((3,7-dimethyloct-6-en-1-yl)oxy)triphenylsilane

Synthesized according to **GP 3**. Purification via column chromatography (petroleum ether/ethyl acetate = 10:1) afforded 1.20 g (58% yield) of the desired product as a colorless oil.

**<sup>1</sup>H NMR** (400 MHz, Chloroform-*d*)  $\delta$  7.64 (d, *J* = 6.8 Hz, 6H), 7.49 – 7.33 (m, 9H), 5.08 (t, *J* = 6.8 Hz, 1H), 3.97 – 3.66 (m, 2H), 2.06 – 1.82 (m, 2H), 1.68 (s, 3H), 1.67 – 1.60 (m, 2H), 1.59 (s, 3H), 1.46 – 1.35 (m, 1H), 1.35 – 1.23 (m, 1H), 1.18 – 1.05 (m, 1H), 0.82 (d, *J* = 6.4 Hz, 3H). **<sup>13</sup>C NMR** (126 MHz, Chloroform-*d*)  $\delta$  135.4 , 134.4 , 131.0 , 129.9 , 127.8 , 124.9 , 62.1 , 39.5 , 37.1 , 29.0 , 25.7 , 25.4 , 19.5 , 17.6 . **IR** (neat, cm<sup>-1</sup>): 2919 (br), 1431 (s), 1101 (s), 704 (s), 509 (s). **HRMS (ESI)** m/z: [M+H]<sup>+</sup> Calcd. for C<sub>28</sub>H<sub>35</sub>OSi: 415.2452; Found: 415.2453.

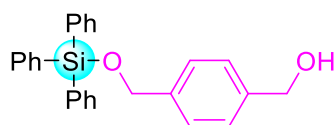

**4g**, (4-(((triphenylsilyl)oxy)methyl)phenyl)methanol

Synthesized according to **GP 3**. Purification via column chromatography (petroleum ether/ethyl acetate = 10:1) afforded 1.38 g (67% yield) of the desired product as a white solid.

**<sup>1</sup>H NMR** (400 MHz, Chloroform-*d*)  $\delta$  7.72 (d, *J* = 6.3 Hz, 6H), 7.54 – 7.30 (m, 13H), 4.95 (s, 2H), 4.69 (s, 2H), 1.87 (br s, 1H). **<sup>13</sup>C NMR** (126 MHz, Chloroform-*d*)  $\delta$  134.0, 139.7, 135.4, 133.9, 130.1, 127.9, 126.9, 126.6, 65.3, 65.1. **IR** (neat, cm<sup>-1</sup>): 3348 (br), 3056 (s), 1104 (s), 817 (m), 699 (s), 502 (s). **HRMS (ESI)** m/z: [M+Na]<sup>+</sup> Calcd. for C<sub>26</sub>H<sub>24</sub>NaO<sub>2</sub>Si: 419.1438; Found: 419.1436.

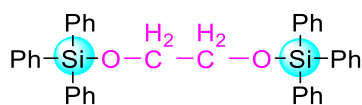

**4h**, 1,1,1,6,6,6-hexaphenyl-2,5-dioxa-1,6-disilahexane

Synthesized according to **GP 3**. Purification via column chromatography (petroleum ether/ethyl acetate = 10:1) afforded 0.94 g (67% yield) of the desired product as a white solid.

**<sup>1</sup>H NMR** (400 MHz, Chloroform-*d*)  $\delta$  7.77 (d, *J* = 6.9 Hz, 12H), 7.54 (t, *J* = 7.3 Hz, 6H), 7.46 (t, *J* = 7.3 Hz, 12H), 4.12 (s, 4H). **<sup>13</sup>C NMR** (126 MHz, Chloroform-*d*)  $\delta$  135.4 , 134.1 , 129.9 , 127.8 , 65.1 . **IR** (neat, cm<sup>-1</sup>): 3058 (br), 1103 (s), 705 (s), 507 (s). **HRMS (ESI)** m/z: [M+Na]<sup>+</sup> Calcd. for C<sub>38</sub>H<sub>34</sub>NaO<sub>2</sub>Si<sub>2</sub>: 601.1990; Found: 601.1985.

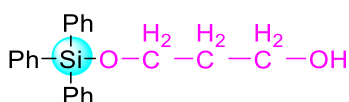

**4i**, 3-((triphenylsilyl)oxy)propan-1-ol

Synthesized according to **GP 3**. Purification via column chromatography (petroleum ether/ethyl acetate = 10:1) afforded 1.00 g (60% yield) of the desired product as a white solid.

$^1\text{H NMR}$  (400 MHz, Chloroform-*d*)  $\delta$  7.68 (d,  $J = 7.2$  Hz, 6H), 7.53 – 7.37 (m, 9H), 4.02 (t,  $J = 5.7$  Hz, 2H), 3.84 (t,  $J = 5.8$  Hz, 2H), 2.30 (br s, 1H), 1.87 (p,  $J = 5.7$  Hz, 2H).  $^{13}\text{C NMR}$  (101 MHz, Chloroform-*d*)  $\delta$  135.3, 133.7, 130.1, 127.9, 62.4, 61.1, 34.4. **IR** (neat,  $\text{cm}^{-1}$ ): 3058 (br), 1425 (s), 1079 (s), 706 (s), 506 (m). **HRMS (ESI)**  $m/z$ :  $[\text{M}+\text{Na}]^+$  Calcd. for  $\text{C}_{21}\text{H}_{22}\text{NaO}_2\text{Si}$ : 357.1281; Found: 357.1278.

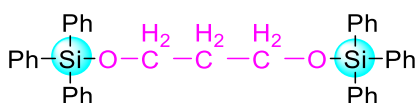

**4i'**, 1,1,1,7,7,7-hexaphenyl-2,6-dioxa-1,7-disilaheptane

Synthesized according to **GP 3**. Purification via column chromatography (petroleum ether/ethyl acetate = 10:1) afforded 0.42 g (28% yield) of the desired product as a white solid.

$^1\text{H NMR}$  (500 MHz, Chloroform-*d*)  $\delta$  7.59 (dd,  $J = 8.0, 1.4$  Hz, 12H), 7.42 (s, 6H), 7.38 – 7.32 (m, 12H), 3.96 (t,  $J = 6.2$  Hz, 4H), 1.88 (p,  $J = 6.2$  Hz, 2H).  $^{13}\text{C NMR}$  (101 MHz, Chloroform-*d*)  $\delta$  135.4, 134.3, 129.9, 127.8, 60.6, 35.3. **IR** (neat,  $\text{cm}^{-1}$ ): 3058 (br), 1426 (s), 1104 (s), 989 (m), 704 (s), 507 (m). **HRMS (ESI)**  $m/z$ :  $[\text{M}+\text{H}]^+$  Calcd. for  $\text{C}_{39}\text{H}_{37}\text{O}_2\text{Si}_2$ : 593.2327; Found: 593.2331.

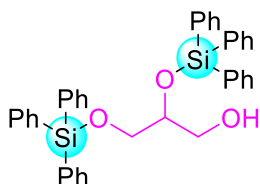

**4j**, 2,3-bis((triphenylsilyl)oxy)propan-1-ol

Synthesized according to **GP 3**. Purification via column chromatography (petroleum ether/ethyl acetate = 10:1) afforded 0.31 g (20% yield) of the desired product as a white solid.

$^1\text{H NMR}$  (400 MHz, Chloroform-*d*)  $\delta$  7.57 (d,  $J = 6.8$  Hz, 6H), 7.51 (d,  $J = 6.7$  Hz, 6H), 7.47 – 7.39 (m, 6H), 7.37 – 7.30 (m, 12H), 4.14 – 4.04 (m, 1H), 3.87 – 3.79 (m, 2H), 3.76 – 3.69 (m, 2H), 1.88 (t,  $J = 6.1$  Hz, 1H).  $^{13}\text{C NMR}$  (101 MHz, Chloroform-*d*)  $\delta$  135.4, 135.3, 134.0, 133.6, 130.1, 130.1, 127.9, 127.9, 73.9, 64.8, 64.4. **IR** (neat,  $\text{cm}^{-1}$ ): 3057 (br), 1427 (m), 1111 (s), 704 (s), 510 (s). **HRMS (ESI)**  $m/z$ :  $[\text{M}+\text{Na}]^+$  Calcd. for  $\text{C}_{39}\text{H}_{36}\text{NaO}_3\text{Si}_2$ : 631.2095; Found: 631.2094.

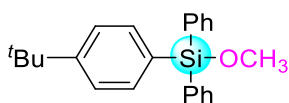

**4k**, (4-(tert-butyl)phenyl)(methoxy)diphenylsilane

Synthesized according to **GP 3**. Purification via column chromatography (petroleum ether/ethyl acetate = 10:1) afforded

0.94 g (54% yield) of the desired product as a colorless oil.

$^1\text{H NMR}$  (400 MHz, Chloroform-*d*)  $\delta$  7.71 – 7.63 (m, 4H), 7.59 (d,  $J$  = 8.3 Hz, 2H), 7.50 – 7.36 (m, 8H), 3.66 (s, 3H), 1.35 (s, 9H).  $^{13}\text{C NMR}$  (101 MHz, Chloroform-*d*)  $\delta$  153.0, 135.4, 135.3, 134.2, 130.2, 129.9, 127.8, 124.9, 51.8, 34.8, 31.2. **IR** (neat,  $\text{cm}^{-1}$ ): 2958 (br), 1084 (s), 700 (s), 570 (m), 499 (s). **HRMS (ESI)**  $m/z$ :  $[\text{M}+\text{H}]^+$  Calcd. for  $\text{C}_{23}\text{H}_{27}\text{OSi}$ : 347.1826; Found: 347.1825.

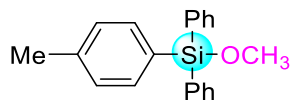

#### 4l, methoxydiphenyl(p-tolyl)silane

Synthesized according to **GP 3**. Purification via column chromatography (petroleum ether/ethyl acetate = 10:1) afforded 0.85 g (56% yield) of the desired product as a colorless oil.

$^1\text{H NMR}$  (400 MHz, Chloroform-*d*)  $\delta$  7.76 – 7.64 (m, 4H), 7.59 (d,  $J$  = 6.8 Hz, 2H), 7.54 – 7.38 (m, 6H), 7.28 (d,  $J$  = 7.6 Hz, 2H), 3.69 (s, 3H), 2.43 (s, 3H).  $^{13}\text{C NMR}$  (101 MHz, Chloroform-*d*)  $\delta$  140.1, 135.5, 135.3, 134.1, 130.2, 130.0, 128.7, 127.8, 51.8, 21.6. **IR** (neat,  $\text{cm}^{-1}$ ): 2938 (br), 1088 (s), 697 (s), 501 (s). **HRMS (ESI)**  $m/z$ :  $[\text{M}+\text{H}]^+$  Calcd. for  $\text{C}_{20}\text{H}_{21}\text{OSi}$ : 305.1356; Found: 305.1357.

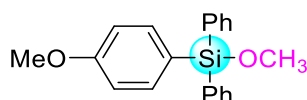

#### 4m, methoxy(4-methoxyphenyl)diphenylsilane

Synthesized according to **GP 3**. Purification via column chromatography (petroleum ether/ethyl acetate = 10:1) afforded 1.10 g (69% yield) of the desired product as a colorless oil.

$^1\text{H NMR}$  (500 MHz, Chloroform-*d*)  $\delta$  7.67 (dt,  $J$  = 7.9, 1.3 Hz, 4H), 7.62 – 7.56 (m, 2H), 7.50 – 7.38 (m, 6H), 6.98 (d,  $J$  = 8.7 Hz, 2H), 3.85 (s, 3H), 3.67 (s, 3H).  $^{13}\text{C NMR}$  (126 MHz, Chloroform-*d*)  $\delta$  161.2, 137.0, 135.3, 134.2, 129.9, 127.8, 124.6, 113.7, 55.0, 51.7. **IR** (neat,  $\text{cm}^{-1}$ ): 2944 (br), 1253 (m), 1104 (s), 809 (m), 701 (s). **HRMS (ESI)**  $m/z$ :  $[\text{M}+\text{H}]^+$  Calcd. for  $\text{C}_{20}\text{H}_{21}\text{O}_2\text{Si}$ : 321.1305; Found: 321.1305.

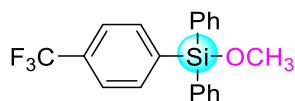

#### 4n, methoxydiphenyl(4-(trifluoromethyl)phenyl)silane

Synthesized according to **GP 1**. Purification via column chromatography (petroleum ether/ethyl acetate = 10:1) afforded 1.75 g (98% yield) of the desired product as a colorless oil.

$^1\text{H NMR}$  (400 MHz, Chloroform-*d*)  $\delta$  7.76 (d,  $J$  = 8.1 Hz, 2H), 7.68 – 7.57 (m, 6H), 7.52 – 7.37 (m, 6H), 3.66 (s, 3H).  $^{13}\text{C NMR}$  (101 MHz, Chloroform-*d*)  $\delta$  139.12, 135.58, 135.32, 132.92, 131.87 (q,  $J$  = 32.2 Hz), 130.42, 128.09, 124.43 (q,  $J$  = 11.4 Hz), 124.14 (q,  $J$  = 3.8 Hz), 51.90.  $^{19}\text{F NMR}$  (376 MHz, Chloroform-*d*)  $\delta$  -62.7. **IR** (neat,  $\text{cm}^{-1}$ ): 2938 (br), 1088 (s), 697 (s), 501 (s). **HRMS (EI-QTOF)**  $m/z$ :  $[\text{M}]^+$  Calcd. for  $\text{C}_{20}\text{H}_{17}\text{OF}_3\text{Si}$ : 358.1001; Found: 358.1006.

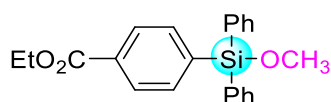

**4o**, ethyl 4-(methoxydiphenylsilyl)benzoate

Synthesized according to **GP 3**. Purification via column chromatography (petroleum ether/ethyl acetate = 10:1) afforded 1.46 g (81% yield) of the desired product as a colorless oil.

$^1\text{H NMR}$  (400 MHz, Chloroform-*d*)  $\delta$  8.04 (d,  $J = 7.6$  Hz, 2H), 7.71 (d,  $J = 7.5$  Hz, 2H), 7.60 (d,  $J = 7.4$  Hz, 4H), 7.51 – 7.43 (m, 2H), 7.40 (t,  $J = 7.4$  Hz, 4H), 4.39 (q,  $J = 7.1$  Hz, 2H), 3.65 (s, 3H), 1.39 (t,  $J = 7.1$  Hz, 3H).  $^{13}\text{C NMR}$  (101 MHz, Chloroform-*d*)  $\delta$  166.6, 140.0, 135.3, 135.2, 133.1, 131.7, 130.3, 128.6, 128.0, 61.0, 51.9, 14.3. **IR** (neat,  $\text{cm}^{-1}$ ): 2980 (br), 1717 (s), 1086 (s), 709 (s), 511 (s). **HRMS (ESI)**  $m/z$ :  $[\text{M}+\text{H}]^+$  Calcd. for  $\text{C}_{22}\text{H}_{23}\text{O}_3\text{Si}$ : 363.1411; Found: 363.1408.

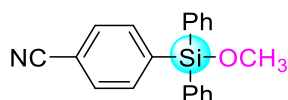

**4p**, 4-(methoxydiphenylsilyl)benzonitrile

Synthesized according to **GP 3**. Purification via column chromatography (petroleum ether/ethyl acetate = 10:1) afforded 0.87 g (55% yield) of the desired product as a white solid.

$^1\text{H NMR}$  (400 MHz, Chloroform-*d*)  $\delta$  7.80 (d,  $J = 8.2$  Hz, 2H), 7.72 – 7.62 (m, 6H), 7.55 – 7.41 (m, 6H), 3.71 (s, 3H).  $^{13}\text{C NMR}$  (101 MHz, Chloroform-*d*)  $\delta$  140.8, 135.5, 135.1, 132.3, 131.0, 130.4, 128.0, 118.6, 113.4, 51.8. **IR** (neat,  $\text{cm}^{-1}$ ): 3054 (br), 1087 (s), 697 (s), 567 (m), 489 (s). **HRMS (ESI)**  $m/z$ :  $[\text{M}+\text{Na}]^+$  Calcd. for  $\text{C}_{20}\text{H}_{17}\text{NNaOSi}$ : 338.0972; Found: 338.0974.

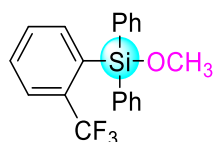

**4q**, methoxydiphenyl(2-(trifluoromethyl)phenyl)silane

Synthesized according to **GP 3**. Purification via column chromatography (petroleum ether/ethyl acetate = 10:1) afforded 1.22 g (68% yield) of the desired product as a colorless oil.

$^1\text{H NMR}$  (400 MHz, Chloroform-*d*)  $\delta$  8.01 – 7.93 (m, 1H), 7.81 – 7.74 (m, 1H), 7.68 – 7.61 (m, 4H), 7.61 – 7.55 (m, 2H), 7.52 – 7.46 (m, 2H), 7.46 – 7.39 (m, 4H), 3.64 (s, 3H).  $^{13}\text{C NMR}$  (101 MHz, Chloroform-*d*)  $\delta$  137.9, 136.0 (q,  $J = 31.5$  Hz), 135.4, 133.6, 132.4 (q,  $J = 2.1$  Hz), 130.7, 130.2, 130.0, 127.8, 126.4 (q,  $J = 5.0$  Hz), 124.6 (q,  $J = 274.4$  Hz), 51.9.  $^{19}\text{F NMR}$  (376 MHz, Chloroform-*d*)  $\delta$  -57.8. **IR** (neat,  $\text{cm}^{-1}$ ): 3060 (br), 1311 (s), 1104 (s), 771 (s), 702 (m). **HRMS (ESI)**  $m/z$ :  $[\text{M}+\text{H}]^+$  Calcd. for  $\text{C}_{20}\text{H}_{18}\text{OF}_3\text{Si}$ : 359.1074; Found: 359.1071.

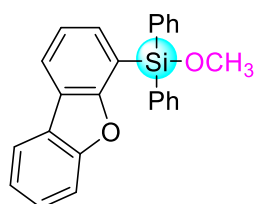

**4r**, dibenzo[b,d]furan-4-yl(methoxy)diphenylsilane

Synthesized according to **GP 3**. Purification via column chromatography (petroleum ether/ethyl acetate = 10:1) afforded 1.72 g (90% yield) of the desired product as a white solid.

$^1\text{H NMR}$  (400 MHz, Chloroform-*d*)  $\delta$  8.08 (dd,  $J = 7.7, 1.3$  Hz, 1H), 7.98 (d,  $J = 7.5$  Hz, 1H), 7.76 – 7.66 (m, 4H), 7.60 (dd,  $J = 7.2, 1.3$  Hz, 1H), 7.50 – 7.44 (m, 3H), 7.43 – 7.31 (m, 7H), 3.78 (s, 3H).  $^{13}\text{C NMR}$  (101 MHz, Chloroform-*d*)  $\delta$  160.8, 156.0, 135.3, 134.8, 133.6, 130.1, 127.8, 126.9, 123.9, 123.2, 122.9, 122.6, 122.5, 120.5, 117.1, 111.7, 52.2. **IR** (neat,  $\text{cm}^{-1}$ ): 3054 (br), 1181 (m), 1087 (s), 744 (s), 701 (s). **HRMS (ESI)**  $m/z$ :  $[\text{M}+\text{H}]^+$  Calcd. for  $\text{C}_{25}\text{H}_{20}\text{O}_2\text{Si}$ : 381.1305; Found: 381.1303.

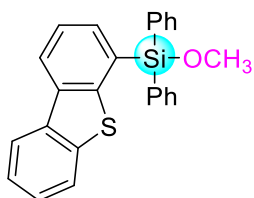

**4s**, dibenzo[b,d]thiophen-4-yl(methoxy)diphenylsilane

Synthesized according to **GP 3**. Purification via column chromatography (petroleum ether/ethyl acetate = 10:1) afforded 1.40 g (71% yield) of the desired product as a white solid.

$^1\text{H NMR}$  (400 MHz, Chloroform-*d*)  $\delta$  8.27 (d,  $J = 7.8$  Hz, 1H), 8.18 (d,  $J = 7.3$  Hz, 1H), 7.79 (d,  $J = 7.0$  Hz, 1H), 7.72 (d,  $J = 6.9$  Hz, 4H), 7.68 (d,  $J = 7.1$  Hz, 1H), 7.54 – 7.46 (m, 3H), 7.42 (t,  $J = 7.3$  Hz, 6H), 3.76 (s, 3H).  $^{13}\text{C NMR}$  (101 MHz, Chloroform-*d*)  $\delta$  146.2, 140.1, 135.6, 135.2, 135.0, 134.9, 132.8, 130.4, 128.4, 128.0, 126.6, 124.1, 123.8, 123.5, 122.5, 121.3, 51.9. **IR** (neat,  $\text{cm}^{-1}$ ): 3055 (br), 1085 (m), 728 (s), 503 (m), 423 (m). **HRMS (ESI)**  $m/z$ :  $[\text{M}+\text{Na}]^+$  Calcd. for  $\text{C}_{25}\text{H}_{20}\text{NaOSSI}$ : 419.0896; Found: 419.0893.

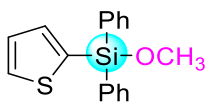

**4t**, methoxydiphenyl(thiophen-2-yl)silane

Synthesized according to **GP 3**. Purification via column chromatography (petroleum ether/ethyl acetate = 10:1) afforded 1.13 g (76% yield) of the desired product as a colorless oil.

$^1\text{H NMR}$  (400 MHz, Chloroform-*d*)  $\delta$  7.88 – 7.68 (m, 5H), 7.61 – 7.42 (m, 7H), 7.38 – 7.27 (m, 1H), 3.84 – 3.66 (m, 3H).  $^{13}\text{C NMR}$  (101 MHz, Chloroform-*d*)  $\delta$  138.0, 135.1, 133.7, 133.0, 132.6, 130.3, 128.2, 127.9, 51.8. **IR** (neat,  $\text{cm}^{-1}$ ): 3060 (br), 1081 (s), 698 (s), 502 (s). **HRMS (ESI)**  $m/z$ :  $[\text{M}+\text{Na}]^+$  Calcd. for  $\text{C}_{17}\text{H}_{16}\text{NaOSSI}$ : 319.0583; Found: 319.0583.

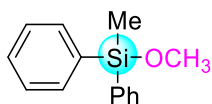

**4u**, methoxy(methyl)diphenylsilane<sup>[8]</sup>

Synthesized according to **GP 3**. Purification via column chromatography (petroleum ether/ethyl acetate = 10:1) afforded 0.61 g (54% yield) of the desired product as a colorless oil.

$^1\text{H NMR}$  (400 MHz, Chloroform-*d*)  $\delta$  7.81 – 7.71 (m, 4H), 7.60 – 7.47 (m, 6H), 3.70 (s, 3H), 0.81 (s, 3H).

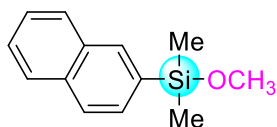

**4v**, methoxydimethyl(naphthalen-2-yl)silane

Synthesized according to **GP 3**. Purification via column chromatography (petroleum ether/ethyl acetate = 10:1) afforded 0.31 g (29% yield) of the desired product as a colorless oil.

$^1\text{H NMR}$  (400 MHz, Chloroform-*d*)  $\delta$  8.15 (s, 1H), 7.98 – 7.84 (m, 3H), 7.71 (d,  $J$  = 8.0 Hz, 1H), 7.59 – 7.47 (m, 2H), 3.55 (s, 3H), 0.53 (s, 6H).  $^{13}\text{C NMR}$  (101 MHz, Chloroform-*d*)  $\delta$  134.8, 134.4, 134.0, 132.9, 129.5, 128.2, 127.7, 127.14, 126.5, 125.9, 50.7, -2.2. **IR** (neat,  $\text{cm}^{-1}$ ): 2954 (br), 1252 (s), 1081 (s), 794 (s), 657 (m). **HRMS (ESI)**  $m/z$ :  $[\text{M}+\text{H}]^+$  Calcd. for  $\text{C}_{13}\text{H}_{17}\text{OSi}$ : 217.1043; Found: 217.1048.

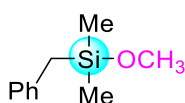

**4w**, benzyl(methoxy)dimethylsilane

Synthesized according to **GP 3**. Purification via column chromatography (petroleum ether/ethyl acetate = 10:1) afforded 0.24 g (27% yield) of the desired product as a colorless oil.

$^1\text{H NMR}$  (400 MHz, Chloroform-*d*)  $\delta$  7.29 – 7.20 (m, 2H), 7.15 – 7.05 (m, 3H), 3.45 (s, 3H), 2.22 (s, 2H), 0.13 (s, 6H).  $^{13}\text{C NMR}$  (126 MHz, Chloroform-*d*)  $\delta$  138.9, 128.2, 128.24, 124.23, 50.5, 26.1, -3.0. **IR** (neat,  $\text{cm}^{-1}$ ): 2953 (br), 1085 (s), 827 (s), 752 (m), 697 (m). **HRMS (ESI)**  $m/z$ :  $[\text{M}+\text{H}]^+$  Calcd. for  $\text{C}_{10}\text{H}_{17}\text{OSi}$ : 181.1043; Found: 181.1043.

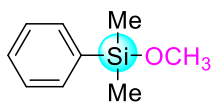

**4x**, methoxydimethyl(phenyl)silane<sup>[8]</sup>

Synthesized according to **GP 3**. Purification via column chromatography (petroleum ether/ethyl acetate = 10:1) afforded 0.12 g (15% yield) of the desired product as a colorless oil.

$^1\text{H NMR}$  (400 MHz, Chloroform-*d*)  $\delta$  7.66 – 7.55 (m, 2H), 7.48 – 7.37 (m, 3H), 3.47 (s, 3H), 0.42 (s, 6H).

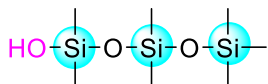

**5a**, 1,1,3,3,5,5,5-heptamethyltrisiloxan-1-ol<sup>[9]</sup>

Synthesized according to **GP 1**. Purification via column chromatography (petroleum ether/ethyl acetate = 10:1) afforded 0.98 g (82% yield) of the desired product as a colorless oil.

$^1\text{H NMR}$  (500 MHz, Chloroform-*d*)  $\delta$  2.43 (s, 1H), 0.11 (s, 18H), 0.08 (s, 3H).

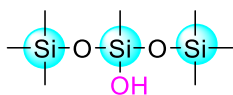



**5b**, 1,1,1,3,5,5,5-heptamethyltrisiloxan-3-ol<sup>[10]</sup>

Synthesized according to **GP 1**. Purification via column chromatography (petroleum ether/ethyl acetate = 10:1) afforded 0.73 g (61% yield) of the desired product as a colorless oil.

<sup>1</sup>H NMR (500 MHz, Chloroform-*d*) δ 2.39 (s, 1H), 0.11 (s, 18H), 0.08 (s, 3H).

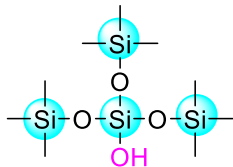

**5c**, tris(trimethylsilyl) hydrogen silicate<sup>[10]</sup>

Synthesized according to **GP 1**. Purification via column chromatography (petroleum ether/ethyl acetate = 10:1) afforded 0.68 g (43% yield) of the desired product as a colorless oil.

<sup>1</sup>H NMR (500 MHz, Chloroform-*d*) δ 2.14 (s, 1H), 0.12 (s, 27H).

## 5. X-ray Diffraction Analyses of Cobalt Complexes K1 and K2

### Complex K1

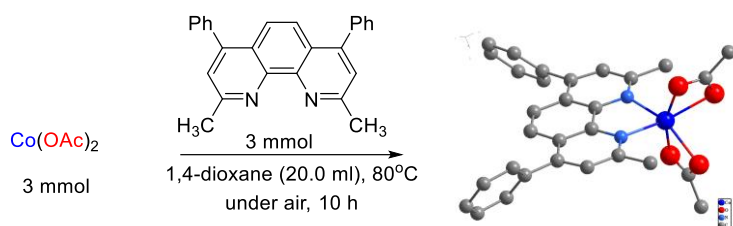

CCDC: 2173145

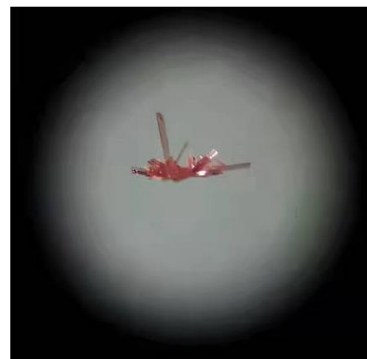

$\text{Co(OAc)}_2$  (3.0 mmol) and 2,9-dimethyl-4,7-diphenyl-1,10-phenanthroline (3.0 mmol) were dissolved in anhydrous 1,4-dioxane (20 mL) under air for 10 h at 80 °C. The precipitate formed was remained about 5 mL solvent by rotary evaporation and collected by filtration with cold 1,4-dioxane as eluent to give a dark orange solid (1.4 g, 80%).

The single crystals of this complex were obtained from the solution of dichloromethane and toluene. Note both the oxygen atoms of the coordinated carboxylate and toluene were partially disordered, which can be easily modified according to the standard operations. The full crystallographic data for **K1** (CCDC: 2173145) can be obtained free of charge from the Cambridge Crystallographic Data Center via <https://www.ccdc.cam.ac.uk/solutions/csd-core/components/csd/>

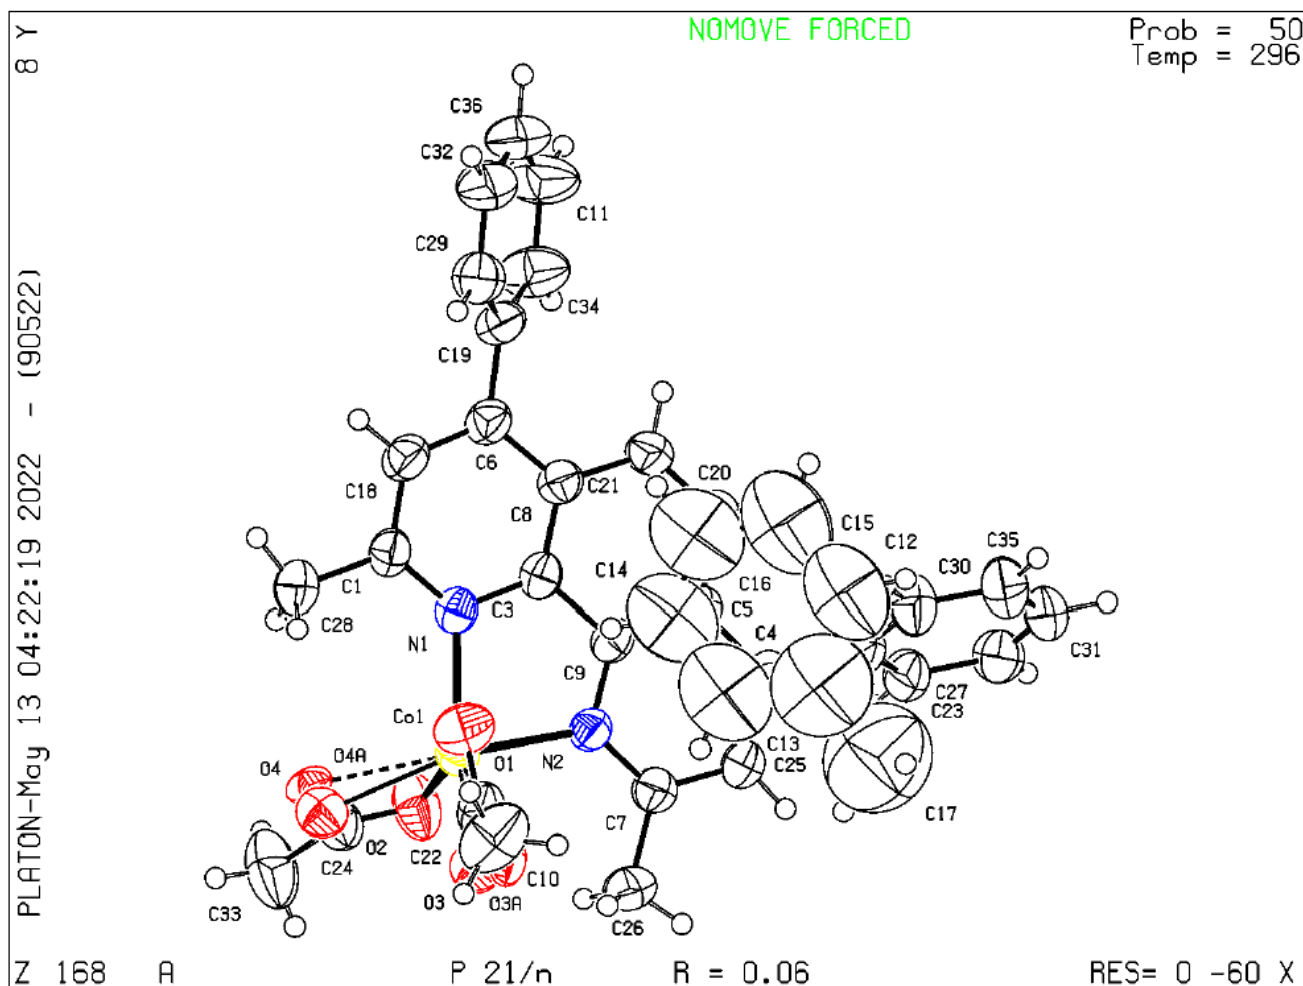

**Table 1-1 Crystal data and structure refinement for K1.**

| Name                                                                     | K1                                                              |
|--------------------------------------------------------------------------|-----------------------------------------------------------------|
| Formula                                                                  | C <sub>37</sub> H <sub>34</sub> CoN <sub>2</sub> O <sub>4</sub> |
| formula weight, fw                                                       | 629.59                                                          |
| Temperature, <i>T</i> [K]                                                | 296(2)                                                          |
| crystal system                                                           | <i>monoclinic</i>                                               |
| space group                                                              | <i>P 21/n</i>                                                   |
| <i>a</i> [Å]                                                             | 14.962(2)                                                       |
| <i>b</i> [Å]                                                             | 8.3869(9)                                                       |
| <i>c</i> [Å]                                                             | 25.544(3)                                                       |
| $\alpha$ [°]                                                             | 90                                                              |
| $\beta$ [°]                                                              | 94.204(4)                                                       |
| $\gamma$ [°]                                                             | 90                                                              |
| <i>V</i> [Å <sup>3</sup> ]                                               | 3196.8(7)                                                       |
| <i>Z</i>                                                                 | 4                                                               |
| $\rho$ [g cm <sup>-3</sup> ]                                             | 1.308                                                           |
| $\mu$ [mm <sup>-1</sup> ]                                                | 0.579                                                           |
| $\theta$ range                                                           | 2.557-25.037                                                    |
| F(000)                                                                   | 1316                                                            |
| goodness-of-fit, GOF                                                     | 1.046                                                           |
| <i>R</i> <sub>1</sub> <sup>a</sup> [ <i>I</i> > 2 $\sigma$ ( <i>I</i> )] | 0.0618                                                          |
| w <i>R</i> <sub>2</sub> <sup>b</sup> (all data)                          | 0.1951                                                          |

$${}^a R_1 = \frac{\sum (|F_o| - |F_c|)}{\sum |F_o|} . {}^b wR_2 = \frac{[\sum w(|F_o|^2 - |F_c|^2)|^2]}{[\sum w|F_o|^2]^2}^{1/2} .$$

**Complex K2**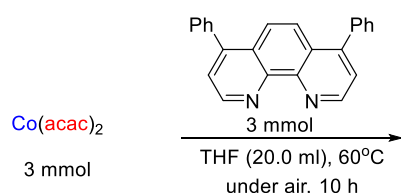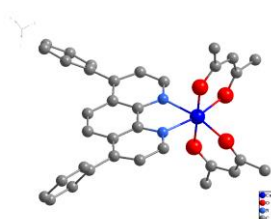

CCDC: 2131308

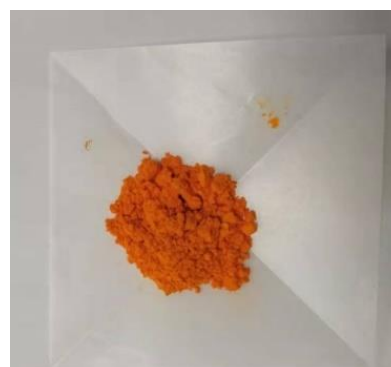

Co(acac)<sub>2</sub> (3.0 mmol) and 4,7-diphenyl-1,10-phenanthroline (3.0 mmol) were dissolved in anhydrous THF (20 mL) under air for 10 h at 60 °C. The precipitate formed was remained about 5 mL solvent by rotary evaporation and collected by filtration with cold THF as eluent to give a dark orange solid (1.4 g, 80%).

The single crystals of this complex were obtained from the solution of dichloromethane and toluene. Note the coordinated dichloromethane molecules are disordered. The full crystallographic data for **K2** (CCDC:2131308) can be obtained free of charge from the Cambridge Crystallographic Data Center via <https://www.ccdc.cam.ac.uk/solutions/csd-core/components/csd/>

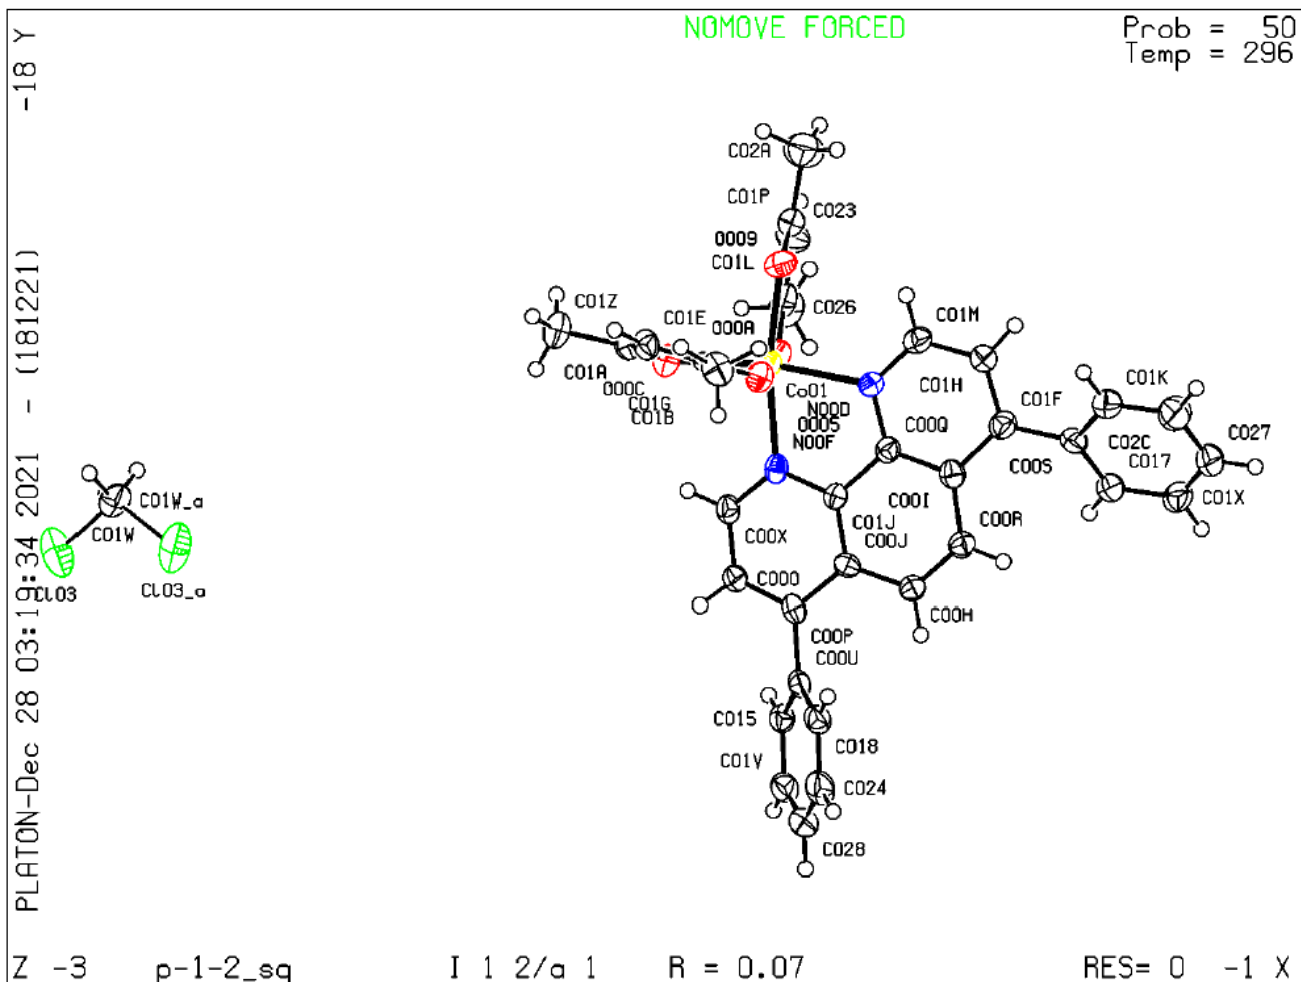

**Table 2-1 Crystal data and structure refinement for K2.**

|                                    |                                                                                               |
|------------------------------------|-----------------------------------------------------------------------------------------------|
| Identification code                | p-1-2_sq                                                                                      |
| Empirical formula                  | C <sub>69</sub> H <sub>62</sub> Cl <sub>2</sub> Co <sub>2</sub> N <sub>4</sub> O <sub>8</sub> |
| Formula weight                     | 1263.98                                                                                       |
| Temperature/K                      | 296.15                                                                                        |
| Crystal system                     | monoclinic                                                                                    |
| Space group                        | I2/a                                                                                          |
| a/Å                                | 16.2739(18)                                                                                   |
| b/Å                                | 19.5624(17)                                                                                   |
| c/Å                                | 22.3063(16)                                                                                   |
| α/°                                | 90                                                                                            |
| β/°                                | 110.570(6)                                                                                    |
| γ/°                                | 90                                                                                            |
| Volume/Å <sup>3</sup>              | 6648.6(11)                                                                                    |
| Z                                  | 4                                                                                             |
| ρ <sub>calc</sub> /cm <sup>3</sup> | 1.263                                                                                         |
| μ/mm <sup>-1</sup>                 | 0.635                                                                                         |
| F(000)                             | 2624.0                                                                                        |

|                                             |                                                                        |
|---------------------------------------------|------------------------------------------------------------------------|
| Crystal size/mm <sup>3</sup>                | ? × ? × ?                                                              |
| Radiation                                   | MoK $\alpha$ ( $\lambda = 0.71073$ )                                   |
| 2 $\theta$ range for data collection/°      | 3.9 to 58.544                                                          |
| Index ranges                                | -22 $\leq$ h $\leq$ 20, -26 $\leq$ k $\leq$ 26, -30 $\leq$ l $\leq$ 28 |
| Reflections collected                       | 36271                                                                  |
| Independent reflections                     | 8229 [R <sub>int</sub> = 0.1728, R <sub>sigma</sub> = 0.2522]          |
| Data/restraints/parameters                  | 8229/0/392                                                             |
| Goodness-of-fit on F <sup>2</sup>           | 0.949                                                                  |
| Final R indexes [ $I \geq 2\sigma(I)$ ]     | R <sub>1</sub> = 0.0692, wR <sub>2</sub> = 0.1405                      |
| Final R indexes [all data]                  | R <sub>1</sub> = 0.2251, wR <sub>2</sub> = 0.1856                      |
| Largest diff. peak/hole / e Å <sup>-3</sup> | 0.37/-0.42                                                             |

**Table 2-2 Fractional Atomic Coordinates ( $\times 104$ ) and Equivalent Isotropic Displacement Parameters ( $\text{\AA}^2 \times 103$ ) for K2. U<sub>eq</sub> is defined as 1/3 of the trace of the orthogonalised UIJ tensor.**

| Atom | x            | y          | z           | U(eq)    |
|------|--------------|------------|-------------|----------|
| Co01 | -8876.5(4)   | 1635.9(3)  | -3712.5(3)  | 28.8(2)  |
| O005 | -8937.9(18)  | 1518.4(14) | -2808.5(13) | 33.3(8)  |
| O009 | -8651.2(19)  | 2653.5(15) | -3579.9(15) | 37.4(8)  |
| O00A | -8831.5(19)  | 1716.3(15) | -4620.2(14) | 34.4(8)  |
| O00C | -10217.7(18) | 1720.0(15) | -4050.5(14) | 34.8(8)  |
| N00D | -7534(2)     | 1380.4(18) | -3244.6(17) | 28.7(9)  |
| N00F | -8848(2)     | 561.2(18)  | -3835.4(16) | 27.2(9)  |
| C00H | -7115(3)     | -721(2)    | -3100(2)    | 29.0(11) |
| C00I | -6514(3)     | 427(2)     | -2856(2)    | 29.2(11) |
| C00J | -7971(3)     | -459(2)    | -3477(2)    | 25.9(10) |
| C00O | -9470(3)     | -541(2)    | -4168(2)    | 30.1(11) |
| C00P | -8705(3)     | -874(2)    | -3815(2)    | 26.0(10) |
| C00Q | -7353(3)     | 702(2)     | -3195(2)    | 26.9(10) |
| C00R | -6428(3)     | -301(2)    | -2808(2)    | 30.9(11) |
| C00S | -4877(3)     | 712(2)     | -2235(2)    | 34.0(11) |
| C00U | -8682(3)     | -1636(2)   | -3806(2)    | 28.1(10) |
| C00X | -9519(3)     | 168(2)     | -4162(2)    | 30.0(11) |
| C015 | -8968(3)     | -1987(2)   | -4388(2)    | 31.8(11) |
| C017 | -4452(3)     | 211(2)     | -2457(2)    | 32.0(11) |
| C018 | -8431(3)     | -2000(2)   | -3239(2)    | 35.1(12) |
| C01A | -10684(3)    | 1894(2)    | -3726(2)    | 33.2(11) |
| C01B | -9418(3)     | 1631(2)    | -1935(2)    | 40.5(12) |
| C01E | -10398(3)    | 1904(2)    | -3055(2)    | 32.2(11) |
| C01F | -5811(3)     | 904(2)     | -2580(2)    | 32.0(11) |
| C01G | -9576(3)     | 1684(2)    | -2641(2)    | 31.2(11) |
| C01H | -6025(3)     | 1593(2)    | -2644(2)    | 35.4(11) |
| C01J | -8079(3)     | 251(2)     | -3509.7(19) | 24.3(10) |
| C01K | -4389(3)     | 1075(2)    | -1693(3)    | 47.1(14) |

|      |             |          |            |          |
|------|-------------|----------|------------|----------|
| C01L | -8710(3)    | 2261(3)  | -4882(2)   | 38.2(12) |
| C01M | -6884(3)    | 1810(2)  | -2963(2)   | 34.1(12) |
| C01P | -8516(3)    | 3068(2)  | -3973(3)   | 41.1(13) |
| C01V | -8976(3)    | -2695(2) | -4390(3)   | 40.0(13) |
| C01X | -3564(3)    | 82(2)    | -2143(2)   | 41.7(13) |
| C01Z | -11619(3)   | 2088(2)  | -4106(2)   | 45.7(13) |
| C023 | -8547(3)    | 2911(3)  | -4592(2)   | 44.5(13) |
| C024 | -8440(3)    | -2704(3) | -3254(3)   | 44.8(13) |
| C026 | -8741(3)    | 2190(3)  | -5565(2)   | 51.0(15) |
| C027 | -3089(3)    | 448(3)   | -1609(3)   | 50.5(14) |
| C028 | -8713(3)    | -3056(3) | -3830(3)   | 44.4(13) |
| C02A | -8293(4)    | 3800(3)  | -3735(3)   | 63.1(17) |
| C02C | -3500(3)    | 949(3)   | -1380(3)   | 59.1(16) |
| Cl03 | -18292.3(9) | 59.8(8)  | -5554.3(7) | 68.1(5)  |
| C01W | -17490(30)  | 569(4)   | -4970(20)  | 41(3)    |

**Table 2-3 Anisotropic Displacement Parameters ( $\text{\AA}^2 \times 10^3$ ) for k2. The Anisotropic displacement factor exponent takes the form:  $-2\pi^2[h^2a^*2U_{11}+2hka^*b^*U_{12}+\dots]$ .**

| Atom | U11      | U22      | U33      | U23      | U13      | U12     |
|------|----------|----------|----------|----------|----------|---------|
| Co01 | 28.4(4)  | 29.8(4)  | 29.4(4)  | 2.2(3)   | 11.8(3)  | 3.5(3)  |
| O005 | 30.6(18) | 38(2)    | 32.5(19) | 0.4(15)  | 12.4(16) | 3.8(15) |
| O009 | 45(2)    | 28.1(19) | 43(2)    | 2.8(16)  | 19.4(18) | 5.0(15) |
| O00A | 36.6(19) | 37.6(19) | 33.0(18) | 10.4(16) | 17.3(16) | 6.4(15) |
| O00C | 29.8(17) | 43(2)    | 30.9(18) | 2.1(16)  | 10.4(15) | 5.2(15) |
| N00D | 27(2)    | 23(2)    | 37(2)    | 1.3(18)  | 12.3(19) | 2.5(18) |
| N00F | 23(2)    | 36(2)    | 25(2)    | 3.8(18)  | 10.9(18) | 2.2(18) |
| C00H | 27(3)    | 27(3)    | 31(3)    | 5(2)     | 8(2)     | 1(2)    |
| C00I | 27(3)    | 34(3)    | 27(3)    | 1(2)     | 10(2)    | -1(2)   |
| C00J | 29(3)    | 24(3)    | 27(3)    | 3(2)     | 12(2)    | -3(2)   |
| C00O | 25(3)    | 30(3)    | 31(3)    | -4(2)    | 5(2)     | -2(2)   |
| C00P | 23(2)    | 35(3)    | 21(2)    | -2(2)    | 9(2)     | -5(2)   |
| C00Q | 26(3)    | 28(3)    | 29(3)    | 3(2)     | 13(2)    | 2(2)    |
| C00R | 29(3)    | 29(3)    | 33(3)    | 6(2)     | 10(2)    | 2(2)    |
| C00S | 30(3)    | 27(3)    | 39(3)    | -1(2)    | 4(2)     | -4(2)   |
| C00U | 20(2)    | 32(3)    | 33(3)    | -3(2)    | 10(2)    | -4(2)   |
| C00X | 23(2)    | 35(3)    | 28(3)    | 3(2)     | 5(2)     | 0(2)    |
| C015 | 26(3)    | 34(3)    | 31(3)    | 1(2)     | 6(2)     | 0(2)    |
| C017 | 32(3)    | 34(3)    | 31(3)    | 0(2)     | 12(2)    | -1(2)   |
| C018 | 30(3)    | 37(3)    | 37(3)    | 6(2)     | 11(2)    | -4(2)   |
| C01A | 29(3)    | 32(3)    | 44(3)    | 3(2)     | 19(3)    | -1(2)   |
| C01B | 42(3)    | 48(3)    | 33(3)    | -6(3)    | 15(2)    | -5(3)   |
| C01E | 27(3)    | 38(3)    | 37(3)    | -8(2)    | 18(2)    | -2(2)   |
| C01F | 31(3)    | 32(3)    | 34(3)    | -2(2)    | 12(2)    | 4(2)    |
| C01G | 39(3)    | 23(3)    | 34(3)    | -8(2)    | 15(2)    | -8(2)   |
| C01H | 30(3)    | 31(3)    | 43(3)    | -3(2)    | 10(2)    | -1(2)   |

|      |         |           |          |          |         |          |
|------|---------|-----------|----------|----------|---------|----------|
| C01J | 24(2)   | 28(3)     | 22(2)    | 0(2)     | 9(2)    | 2(2)     |
| C01K | 36(3)   | 36(3)     | 63(4)    | -9(3)    | 9(3)    | 1(2)     |
| C01L | 26(3)   | 51(3)     | 39(3)    | 13(3)    | 13(2)   | 11(2)    |
| C01M | 34(3)   | 28(3)     | 39(3)    | -4(2)    | 12(2)   | 4(2)     |
| C01P | 29(3)   | 33(3)     | 58(4)    | -2(3)    | 12(3)   | 2(2)     |
| C01V | 32(3)   | 37(3)     | 50(3)    | -12(3)   | 14(3)   | -5(2)    |
| C01X | 38(3)   | 39(3)     | 57(4)    | 6(3)     | 27(3)   | 6(3)     |
| C01Z | 33(3)   | 55(3)     | 51(3)    | 1(3)     | 17(3)   | 9(3)     |
| C023 | 47(3)   | 39(3)     | 52(4)    | 10(3)    | 22(3)   | -7(3)    |
| C024 | 36(3)   | 50(4)     | 48(4)    | 19(3)    | 15(3)   | -4(3)    |
| C026 | 52(3)   | 69(4)     | 34(3)    | 18(3)    | 19(3)   | 5(3)     |
| C027 | 31(3)   | 44(3)     | 65(4)    | -10(3)   | 2(3)    | -2(3)    |
| C028 | 35(3)   | 34(3)     | 63(4)    | 5(3)     | 16(3)   | -4(2)    |
| C02A | 68(4)   | 48(4)     | 80(4)    | 1(3)     | 34(4)   | -5(3)    |
| C02C | 43(3)   | 49(4)     | 67(4)    | -22(3)   | -4(3)   | 1(3)     |
| Cl03 | 43.4(8) | 102.9(13) | 60.1(10) | -24.9(9) | 20.9(8) | -20.5(8) |
| C01W | 43(6)   | 45(5)     | 40(7)    | 21(15)   | 20(6)   | 10(20)   |

**Table 2-4 Bond Lengths for K2**

| Atom | Atom | Length/Å | Atom | Atom | Length/Å |
|------|------|----------|------|------|----------|
| Co01 | O005 | 2.067(3) | C00S | C017 | 1.386(6) |
| Co01 | O009 | 2.027(3) | C00S | C01F | 1.490(6) |
| Co01 | O00A | 2.058(3) | C00S | C01K | 1.387(6) |
| Co01 | O00C | 2.050(3) | C00U | C015 | 1.396(6) |
| Co01 | N00D | 2.124(3) | C00U | C018 | 1.385(6) |
| Co01 | N00F | 2.123(4) | C015 | C01V | 1.386(6) |
| O005 | C01G | 1.263(5) | C017 | C01X | 1.390(6) |
| O009 | C01P | 1.269(5) | C018 | C024 | 1.377(6) |
| O00A | C01L | 1.264(5) | C01A | C01E | 1.402(6) |
| O00C | C01A | 1.265(5) | C01A | C01Z | 1.508(6) |
| N00D | C00Q | 1.355(5) | C01B | C01G | 1.507(6) |
| N00D | C01M | 1.324(5) | C01E | C01G | 1.401(6) |
| N00F | C00X | 1.324(5) | C01F | C01H | 1.388(6) |
| N00F | C01J | 1.350(5) | C01H | C01M | 1.394(6) |
| C00H | C00J | 1.444(5) | C01K | C02C | 1.390(6) |
| C00H | C00R | 1.356(5) | C01L | C023 | 1.408(6) |
| C00I | C00Q | 1.414(6) | C01L | C026 | 1.514(6) |
| C00I | C00R | 1.431(6) | C01P | C023 | 1.399(7) |
| C00I | C01F | 1.435(6) | C01P | C02A | 1.526(6) |
| C00J | C00P | 1.423(5) | C01V | C028 | 1.367(6) |
| C00J | C01J | 1.399(5) | C01X | C027 | 1.373(6) |
| C00O | C00P | 1.381(5) | C024 | C028 | 1.386(7) |
| C00O | C00X | 1.391(5) | C027 | C02C | 1.382(6) |

|           |          |      |      |         |
|-----------|----------|------|------|---------|
| C00P C00U | 1.490(6) | Cl03 | C01W | 1.79(4) |
| C00Q C01J | 1.444(6) |      |      |         |

**Table 2-5 Bond Angles for K2.**

| Atom Atom Atom | Angle/°    | Atom Atom Atom | Angle/°  |
|----------------|------------|----------------|----------|
| O005 Co01 N00D | 83.59(12)  | C017 C00S C01F | 122.7(4) |
| O005 Co01 N00F | 91.52(12)  | C017 C00S C01K | 117.9(4) |
| O009 Co01 O005 | 92.02(12)  | C01K C00S C01F | 119.2(4) |
| O009 Co01 O00A | 90.08(12)  | C015 C00U C00P | 118.8(4) |
| O009 Co01 O00C | 95.14(12)  | C018 C00U C00P | 121.6(4) |
| O009 Co01 N00D | 93.29(13)  | C018 C00U C015 | 119.5(4) |
| O009 Co01 N00F | 168.67(12) | N00F C00X C00O | 123.1(4) |
| O00A Co01 O005 | 177.88(12) | C01V C015 C00U | 119.6(4) |
| O00A Co01 N00D | 96.63(12)  | C00S C017 C01X | 120.7(4) |
| O00A Co01 N00F | 86.49(12)  | C024 C018 C00U | 119.7(5) |
| O00C Co01 O005 | 87.56(11)  | O00C C01A C01E | 125.0(4) |
| O00C Co01 O00A | 91.92(11)  | O00C C01A C01Z | 115.9(4) |
| O00C Co01 N00D | 167.99(12) | C01E C01A C01Z | 119.1(4) |
| O00C Co01 N00F | 95.77(12)  | C01G C01E C01A | 125.5(4) |
| N00F Co01 N00D | 76.41(13)  | C00I C01F C00S | 124.9(4) |
| C01G O005 Co01 | 125.9(3)   | C01H C01F C00I | 117.0(4) |
| C01P O009 Co01 | 126.4(3)   | C01H C01F C00S | 118.1(4) |
| C01LO00A Co01  | 125.8(3)   | O005 C01G C01B | 115.8(4) |
| C01A O00C Co01 | 125.9(3)   | O005 C01G C01E | 125.3(4) |
| C00QN00D Co01  | 115.3(3)   | C01E C01G C01B | 118.9(4) |
| C01MN00D Co01  | 126.6(3)   | C01F C01H C01M | 121.2(4) |
| C01MN00D C00Q  | 117.9(4)   | N00F C01J C00J | 123.4(4) |
| C00X N00F Co01 | 126.5(3)   | N00F C01J C00Q | 115.6(4) |
| C00X N00F C01J | 117.7(4)   | C00J C01J C00Q | 120.9(4) |
| C01J N00F Co01 | 115.7(3)   | C00S C01K C02C | 121.6(5) |
| C00R C00H C00J | 121.9(4)   | O00A C01L C023 | 125.7(4) |
| C00Q C00I C00R | 118.0(4)   | O00A C01L C026 | 115.6(4) |
| C00Q C00I C01F | 117.1(4)   | C023 C01L C026 | 118.6(4) |
| C00R C00I C01F | 124.9(4)   | N00DC01M C01H  | 122.7(4) |
| C00P C00JC00H  | 124.3(4)   | O009 C01P C023 | 125.9(4) |
| C01J C00JC00H  | 117.5(4)   | O009 C01P C02A | 116.0(5) |
| C01J C00J C00P | 118.2(4)   | C023 C01P C02A | 118.1(5) |
| C00P C00O C00X | 120.6(4)   | C028 C01V C015 | 121.0(5) |
| C00J C00P C00U | 123.5(4)   | C027 C01X C017 | 120.8(4) |
| C00O C00P C00J | 117.0(4)   | C01P C023 C01L | 126.0(4) |



|                |          |                |          |
|----------------|----------|----------------|----------|
| C00O C00P C00U | 119.5(4) | C018 C024 C028 | 121.1(5) |
| N00D C00Q C00I | 123.9(4) | C01X C027 C02C | 119.5(5) |
| N00D C00Q C01J | 116.2(4) | C01V C028 C024 | 119.1(5) |
| C00I C00Q C01J | 119.9(4) | C027 C02C C01K | 119.5(5) |
| C00H C00R C00I | 121.7(4) |                |          |

**Table 2-6 Torsion Angles for K2.**

| A    | B    | C    | D    | Angle <sup>o</sup> | A    | B    | C    | D    | Angle <sup>o</sup> |
|------|------|------|------|--------------------|------|------|------|------|--------------------|
| Co01 | O005 | C01G | C01B | -172.5(3)          | C00R | C00I | C00Q | N00D | 176.1(4)           |
| Co01 | O005 | C01G | C01E | 7.9(6)             | C00R | C00I | C00Q | C01J | -3.5(6)            |
| Co01 | O009 | C01P | C023 | 4.0(7)             | C00R | C00I | C01F | C00S | 3.9(7)             |
| Co01 | O009 | C01P | C02A | -175.4(3)          | C00R | C00I | C01F | C01H | -176.5(4)          |
| Co01 | O00A | C01L | C023 | 2.8(6)             | C00S | C017 | C01X | C027 | -0.3(7)            |
| Co01 | O00A | C01L | C026 | -177.7(3)          | C00S | C01F | C01H | C01M | 179.7(4)           |
| Co01 | O00C | C01A | C01E | -15.9(6)           | C00S | C01K | C02C | C027 | -0.3(8)            |
| Co01 | O00C | C01A | C01Z | 165.4(3)           | C00U | C015 | C01V | C028 | 0.5(6)             |
| Co01 | N00D | C00Q | C00I | -174.8(3)          | C00U | C018 | C024 | C028 | -1.3(7)            |
| Co01 | N00D | C00Q | C01J | 4.8(4)             | C00X | N00F | C01J | C00J | -3.1(6)            |
| Co01 | N00D | C01M | C01H | 177.4(3)           | C00X | N00F | C01J | C00Q | 176.2(3)           |
| Co01 | N00F | C00X | C00O | -173.3(3)          | C00X | C00O | C00P | C00J | -3.1(6)            |
| Co01 | N00F | C01J | C00J | 172.6(3)           | C00X | C00O | C00P | C00U | 177.3(4)           |
| Co01 | N00F | C01J | C00Q | -8.1(4)            | C015 | C00U | C018 | C024 | 2.1(6)             |
| O009 | C01P | C023 | C01L | -1.8(8)            | C015 | C01V | C028 | C024 | 0.2(7)             |
| O00A | C01L | C023 | C01P | -2.0(8)            | C017 | C00S | C01F | C00I | 43.7(7)            |
| O00C | C01A | C01E | C01G | -4.3(7)            | C017 | C00S | C01F | C01H | -135.9(5)          |
| N00D | C00Q | C01J | N00F | 2.1(5)             | C017 | C00S | C01K | C02C | 0.3(7)             |
| N00D | C00Q | C01J | C00J | -178.6(4)          | C017 | C01X | C027 | C02C | 0.3(8)             |
| C00H | C00J | C00P | C00O | -178.1(4)          | C018 | C00U | C015 | C01V | -1.7(6)            |
| C00H | C00J | C00P | C00U | 1.5(6)             | C018 | C024 | C028 | C01V | 0.2(7)             |
| C00H | C00J | C01J | N00F | -178.8(3)          | C01A | C01E | C01G | O005 | 8.6(7)             |
| C00H | C00J | C01J | C00Q | 1.9(6)             | C01A | C01E | C01G | C01B | -171.0(4)          |
| C00I | C00Q | C01J | N00F | -178.2(3)          | C01F | C00I | C00Q | N00D | -3.2(6)            |
| C00I | C00Q | C01J | C00J | 1.1(6)             | C01F | C00I | C00Q | C01J | 177.1(4)           |
| C00I | C01F | C01H | C01M | 0.0(6)             | C01F | C00I | C00R | C00H | -177.8(4)          |
| C00J | C00H | C00R | C00I | 0.1(6)             | C01F | C00S | C017 | C01X | 175.6(4)           |
| C00J | C00P | C00U | C015 | -128.1(4)          | C01F | C00S | C01K | C02C | -175.5(5)          |
| C00J | C00P | C00U | C018 | 55.5(6)            | C01F | C01H | C01M | N00D | -3.0(7)            |
| C00O | C00P | C00U | C015 | 51.4(5)            | C01J | N00F | C00X | C00O | 1.9(6)             |
| C00O | C00P | C00U | C018 | -124.9(4)          | C01J | C00J | C00P | C00O | 1.9(6)             |
| C00P | C00J | C01J | N00F | 1.2(6)             | C01J | C00J | C00P | C00U | -178.5(4)          |

|                     |           |                     |           |
|---------------------|-----------|---------------------|-----------|
| C00P C00J C01J C00Q | -178.0(4) | C01K C00S C017 C01X | 0.0(7)    |
| C00P C00O C00X N00F | 1.3(6)    | C01K C00S C01F C00I | -140.7(5) |
| C00P C00U C015 C01V | -178.1(4) | C01K C00S C01F C01H | 39.7(6)   |
| C00P C00U C018 C024 | 178.4(4)  | C01MN00D C00Q C00I  | 0.5(6)    |
| C00Q N00D C01M C01H | 2.7(6)    | C01MN00D C00Q C01J  | -179.9(4) |
| C00Q C00I C00R C00H | 2.9(6)    | C01X C027 C02C C01K | 0.0(8)    |
| C00Q C00I C01F C00S | -176.8(4) | C01Z C01A C01E C01G | 174.4(4)  |
| C00Q C00I C01F C01H | 2.8(6)    | C026 C01L C023 C01P | 178.5(4)  |
| C00R C00H C00J C00P | 177.4(4)  | C02A C01P C023 C01L | 177.6(4)  |
| C00R C00H C00J C01J | -2.6(6)   |                     |           |

**Table 2-7 Hydrogen Atom Coordinates ( $\text{\AA}\times 10^4$ ) and Isotropic Displacement Parameters ( $\text{\AA}^2\times 10^3$ ) for K2.**

| Atom | x         | y        | z        | U(eq) |
|------|-----------|----------|----------|-------|
| H00H | -7032.9   | -1191.13 | -3056.9  | 35    |
| H00O | -9957.02  | -793.78  | -4412.36 | 36    |
| H00R | -5887.07  | -490.34  | -2571.11 | 37    |
| H00X | -10046.98 | 376.91   | -4398.58 | 36    |
| H015 | -9153.23  | -1746.43 | -4772.65 | 38    |
| H017 | -4764.26  | -39.9    | -2819.53 | 38    |
| H018 | -8258.01  | -1771    | -2848.62 | 42    |
| H01A | -9867.53  | 1876.13  | -1839.89 | 61    |
| H01B | -8854.91  | 1823.05  | -1695.83 | 61    |
| H01C | -9429.49  | 1158.78  | -1820.42 | 61    |
| H01E | -10787.71 | 2071.67  | -2869.73 | 39    |
| H01H | -5586.74  | 1916.79  | -2471.32 | 43    |
| H01K | -4662.87  | 1411.52  | -1536.04 | 56    |
| H01M | -7006.35  | 2275.62  | -2978.51 | 41    |
| H01V | -9162.08  | -2928.36 | -4778.18 | 48    |
| H01X | -3289.33  | -256.98  | -2296.64 | 50    |
| H01D | -11624.72 | 2447.05  | -4400.26 | 69    |
| H01F | -11903.45 | 2243.26  | -3819.22 | 69    |
| H01G | -11925.66 | 1697.14  | -4339.02 | 69    |
| H023 | -8450.82  | 3268.02  | -4834.79 | 53    |
| H024 | -8259.09  | -2947.02 | -2871    | 54    |
| H02A | -9340.69  | 2197.02  | -5851.15 | 76    |
| H02B | -8474.12  | 1765.38  | -5612.38 | 76    |
| H02C | -8427.79  | 2562.45  | -5666.03 | 76    |
| H027 | -2494.39  | 359.69   | -1402.7  | 61    |
| H028 | -8717.63  | -3531.68 | -3834.51 | 53    |
| H02D | -8806.14  | 4017.45  | -3704.53 | 95    |
| H02E | -8096.04  | 4049.04  | -4030.34 | 95    |
| H02F | -7837.56  | 3795.17  | -3321.29 | 95    |
| H02G | -3183.47  | 1200.39  | -1018.3  | 71    |
| H01W | -17204.67 | 861.58   | -5188.06 | 49    |

**Table 2-8. Atomic Occupancy for K2**

|                |                |                |
|----------------|----------------|----------------|
| Atom Occupancy | Atom Occupancy | Atom Occupancy |
| C01W 0.5       |                |                |

**Table 2-9 Solvent masks information for K-2**

| Number | X      | Y     | Z     | Volume | Electron count | Content |
|--------|--------|-------|-------|--------|----------------|---------|
| 1      | -0.017 | 0.000 | 0.000 | 430    | 109            |         |
| 2      | -0.009 | 0.500 | 0.500 | 430    | 109            |         |

## 6. The Synthesis and Characterization of Silicon Polymer

Followed the GP1, this transformation was complete within 15 min, which proceeded via a purple reaction solution and vigorously released H<sub>2</sub> gas. To our delight, the olive color of the crude reaction materials could be removed with dichloromethane as the eluent to finally afford the pale green solid.

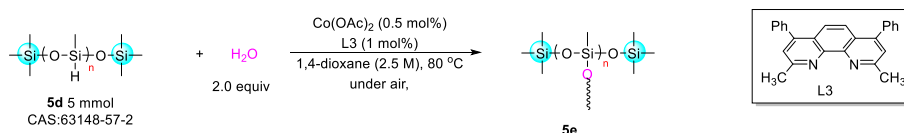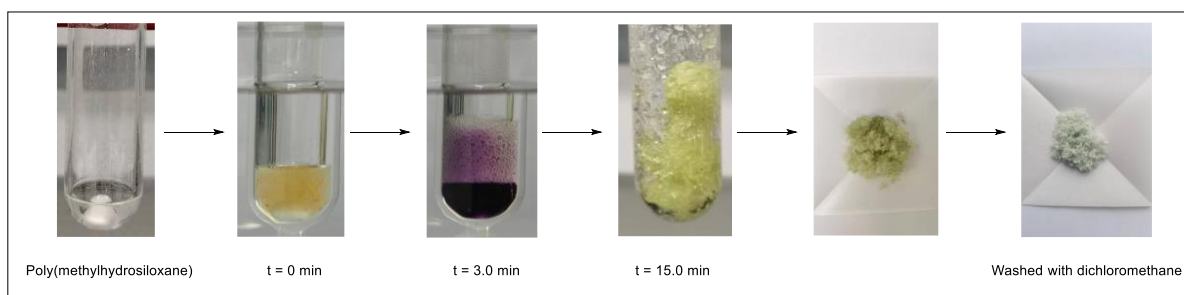

The IR spectrum of **5d** showed the characteristic absorption band of Si-H at 2163 cm<sup>-1</sup> of the poly(methylhydrosiloxane) **5e** completely disappeared while a broad absorption peak at 3475 cm<sup>-1</sup> appeared.

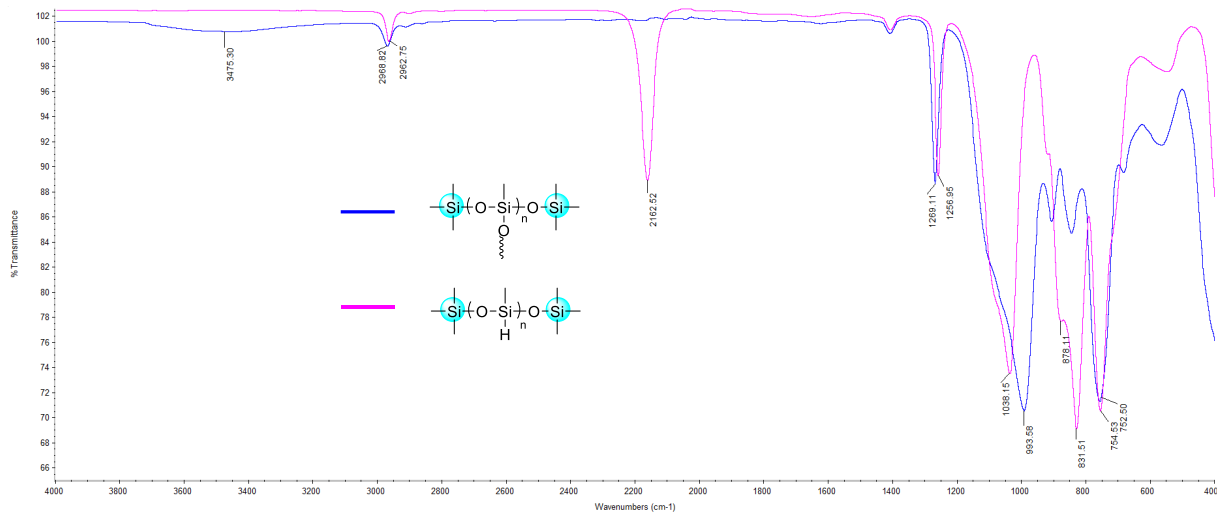

IR spectrum of silane polymer

Thermogravimetry (TG) measurement revealed it exhibits a decomposition temperature of 763 K, which is comparable to those values of polytetrafluoroethylene (782 K) and Nylon 66 (703-746 K).

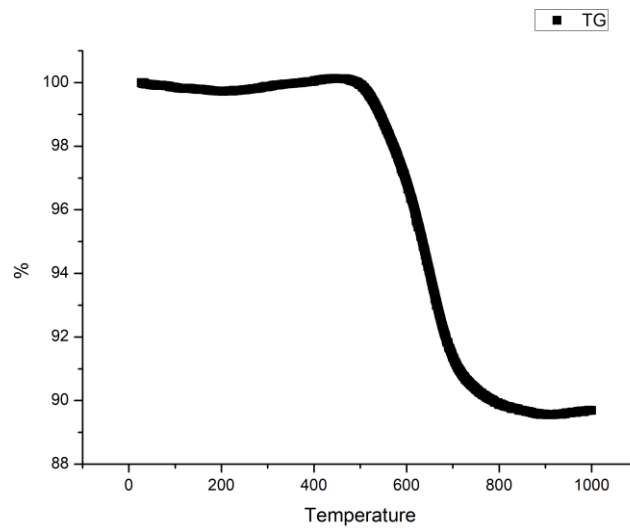

Thermogravimetry (TG) experiment

| Structure                                                                         | Polymer                   | Decomposed temperature (K) |
|-----------------------------------------------------------------------------------|---------------------------|----------------------------|
| 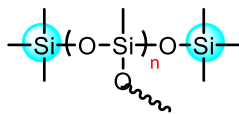 | This work                 | 763                        |
|  | Polyethylene              | 687                        |
|  | Polyvinylidene difluoride | 738-758                    |
|  | Poly(tetrafluoroethylene) | 782                        |
|  | Nylon 66                  | 703-746                    |

See the reference: *Morgan J. Hurley*; SFPE Handbook of Fire Protection Engineering (DOI 10.1007/978-1-4939-2565-0)

## 7. Mechanistic Studies

### 7.1 Exploration of the origin of the oxygen atom

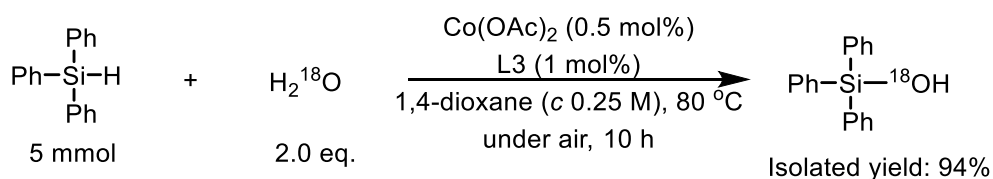

To a mixture of silane (5 mmol),  $\text{Co(OAc)}_2$  (0.5 mol%), **L3** (1 mol%) in 1,4-dioxane (*c* 2.5 M) with  $\text{H}_2^{18}\text{O}$  under air at 80 °C for 10 h. After purification via column chromatography, the product was analyzed by  $^1\text{H}$  NMR and HRMS. HRMS (ESI) *m/z* calcd. for  $\text{C}_{18}\text{H}_{15}^{18}\text{OSi}$  [M-H] $^-$  277.0940, found 277.0951; HRMS (ESI) *m/z* calcd for  $\text{C}_{18}\text{H}_{15}^{16}\text{OSi}$  [M-H] $^-$  275.0898, found 275.0910. It suggests the oxygen atom originated from water.

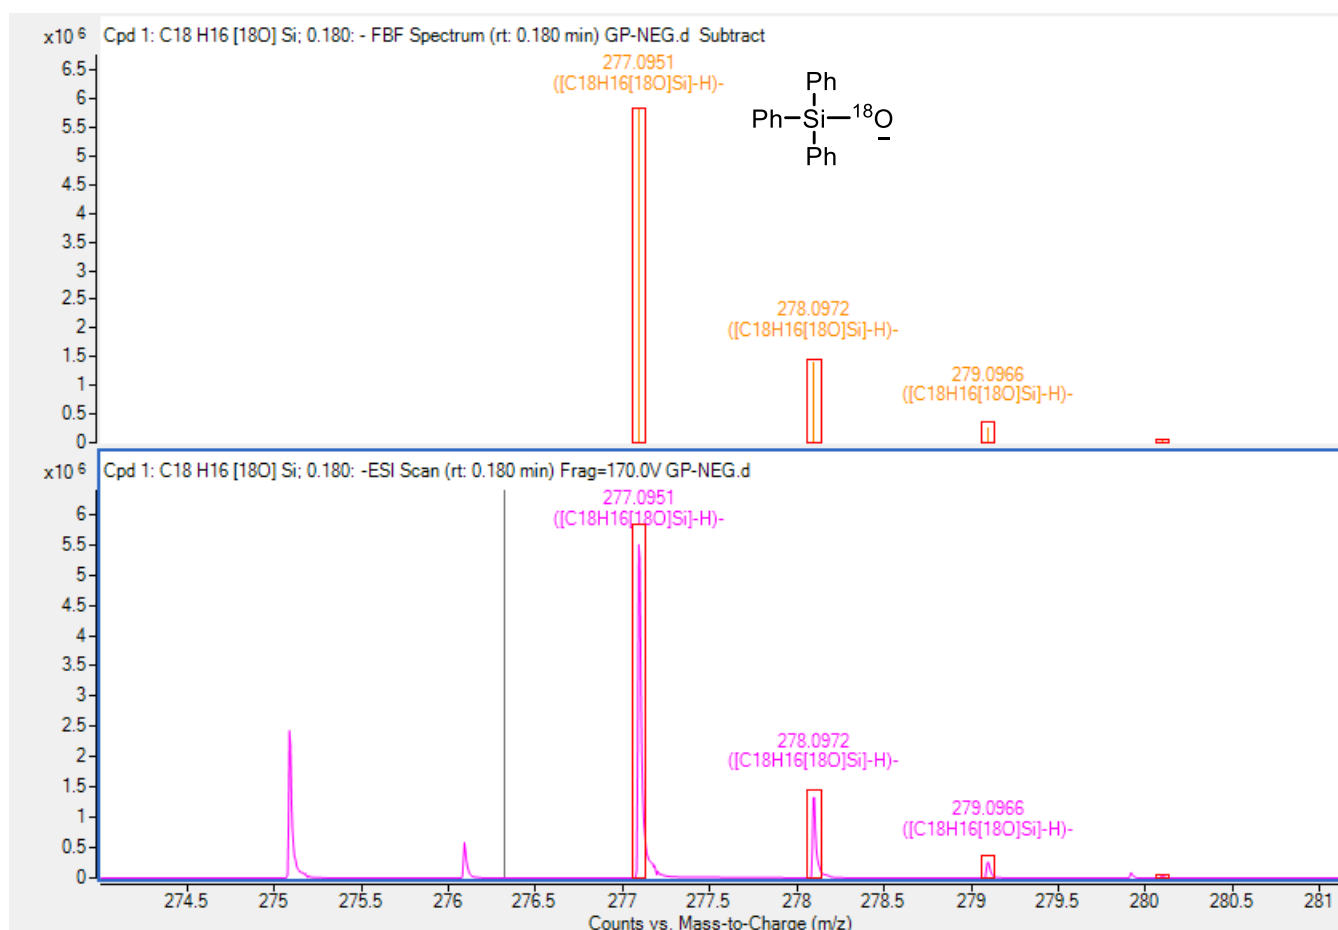

Control experiment showed there was a 9% yield of silanol without water and a 88% yield under the deoxygenated water under the nitrogen atmosphere.

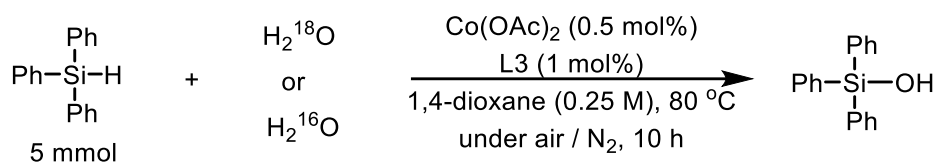

|       | Under air/ H <sub>2</sub> <sup>18</sup> O | Under air/H <sub>2</sub> <sup>16</sup> O | Under air | N <sub>2</sub> /H <sub>2</sub> <sup>16</sup> O (Deoxygenated) |
|-------|-------------------------------------------|------------------------------------------|-----------|---------------------------------------------------------------|
| Yield | 94%                                       | 94%                                      | 9%        | 88%                                                           |

## 7.2 Analysis of H<sub>2</sub> gas by gas chromatography

To a 10 mL flame-dried Schlenk tube with a stirring bar was added silane, Co(OAc)<sub>2</sub> (0.5 mol%), and L3 (1 mol%). H<sub>2</sub>O and 1,4-dioxane (*c* 0.2 M) were added *via* syringe at 80 °C (oil bath) under N<sub>2</sub> atmosphere for 10 h. Gas chromatography showed the interval time after injection time with 2.5 min and 10.0 min for H<sub>2</sub> and N<sub>2</sub> gases, respectively. The amount of H<sub>2</sub> was measured based on the area with the linear equation [H<sub>2</sub> (μmol)=area/90/91\*29]. The yield of silanol was given with CH<sub>2</sub>Br<sub>2</sub> as the internal standard.

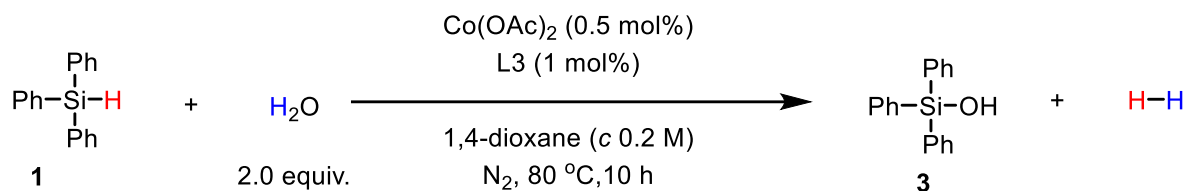

| Entry | <b>1</b> | <b>3</b> | Calcd.(H <sub>2</sub> /mmol) | Measured (H <sub>2</sub> /mmol) |
|-------|----------|----------|------------------------------|---------------------------------|
| 1     | 0.1 mol  | 26%      | 0.026                        | 0.040                           |
| 2     | 0.2 mol  | 52%      | 0.104                        | 0.0991                          |

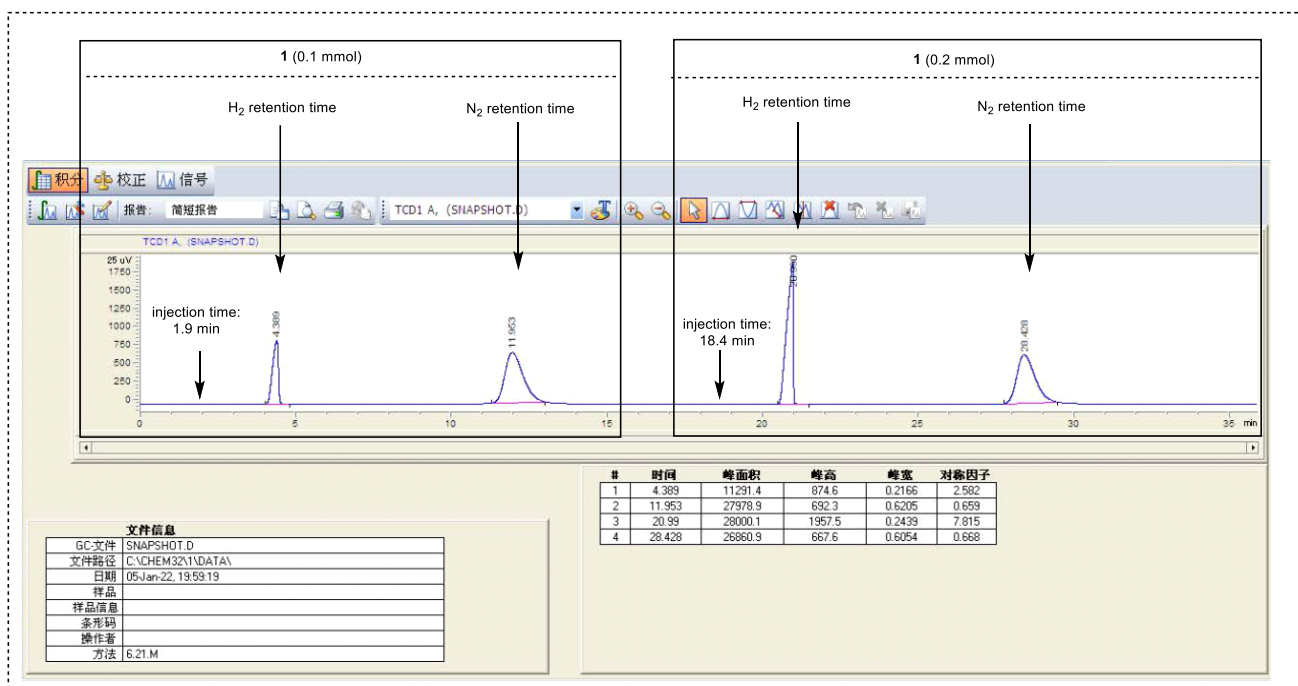

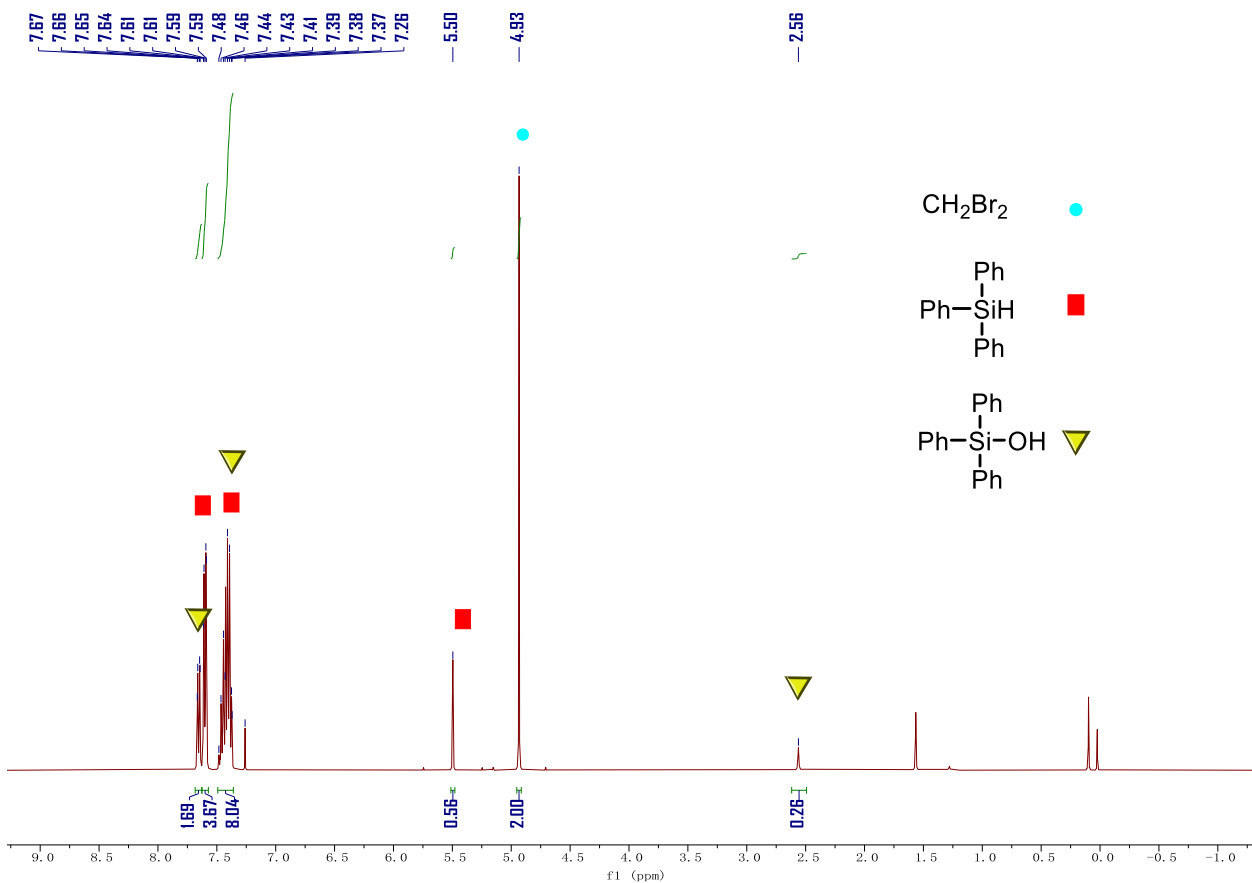

Crude  $^1\text{H}$  NMR Spectrum of reaction with **1** (0.1 mmol) ( $\text{CH}_2\text{Br}_2$  as the internal standard)

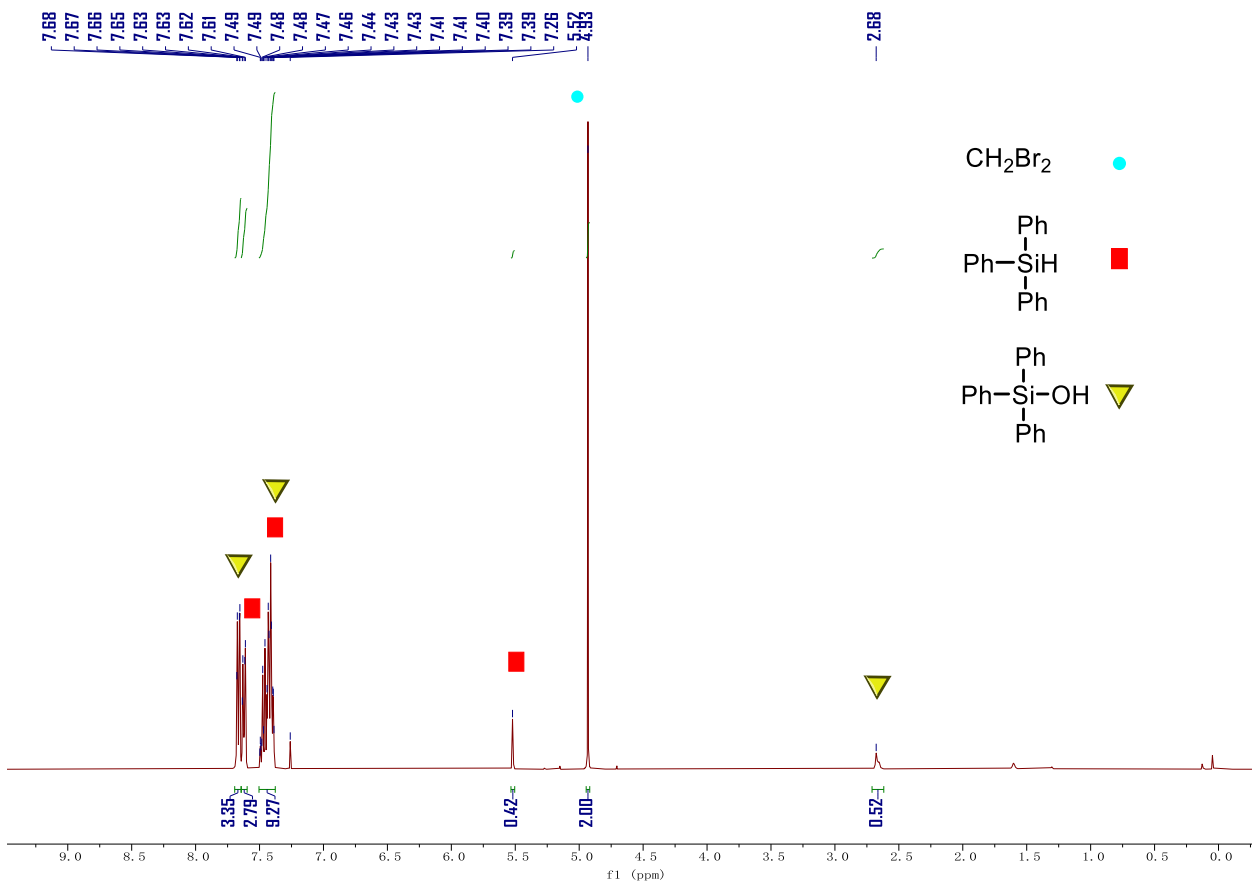



Crude  $^1\text{H}$  NMR Spectrum of reaction with **1** (0.2 mmol) ( $\text{CH}_2\text{Br}_2$  as the internal standard)

### 7.3 Radical inhibition experiment

TEMPO was added to the solution of silane under standard conditions. The solvent was removed under reduced pressure and the residue was purified by column chromatography to afford the product in an 87% yield. This result ruled out the involvement of a radical intermediacy.

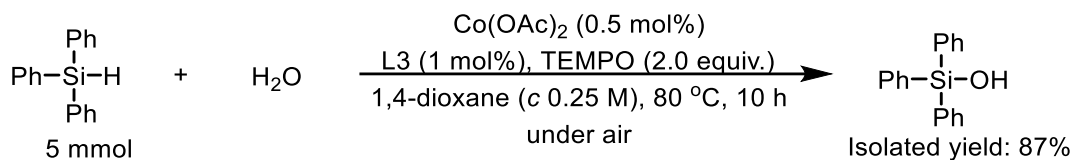

### 7.4 Proof of a stereo-retentive oxidation

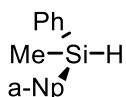

(*R*)-methyl(naphthalen-1-yl)(phenyl)silane<sup>[1]</sup>, white solid, 20% *ee*. The *ee* value was determined by HPLC [CHIRALPAK<sup>®</sup> OD-H, eluent: *n*-hexane, 0.5 mL/min, 254 nm;  $t_{\text{R}} = 28$  min,  $t_{\text{S}} = 33$  min].

$^1\text{H}$  NMR (400 MHz, Chloroform-*d*)  $\delta$  8.15 – 8.08 (m, 1H), 7.96 (d,  $J = 8.2$  Hz, 1H), 7.91 (dd,  $J = 7.2, 2.2$  Hz, 1H), 7.80 (dd,  $J = 6.8, 1.2$  Hz, 1H), 7.63 (dd,  $J = 7.7, 1.6$  Hz, 2H), 7.56 – 7.46 (m, 3H), 7.46 – 7.35 (m, 3H), 5.42 (q,  $J = 3.9$  Hz, 1H), 0.82 (d,  $J = 3.9$  Hz, 3H).

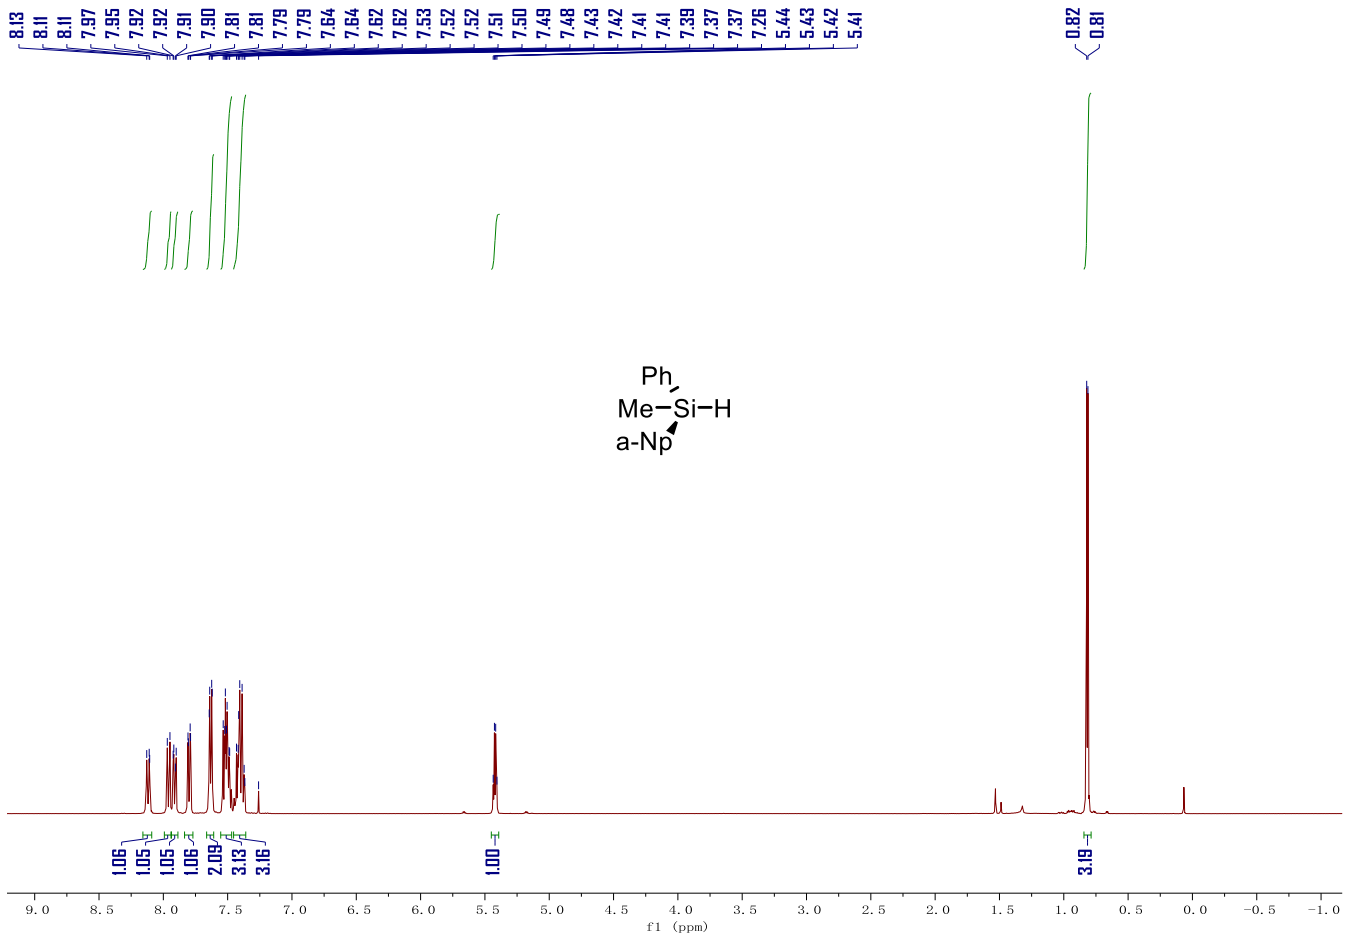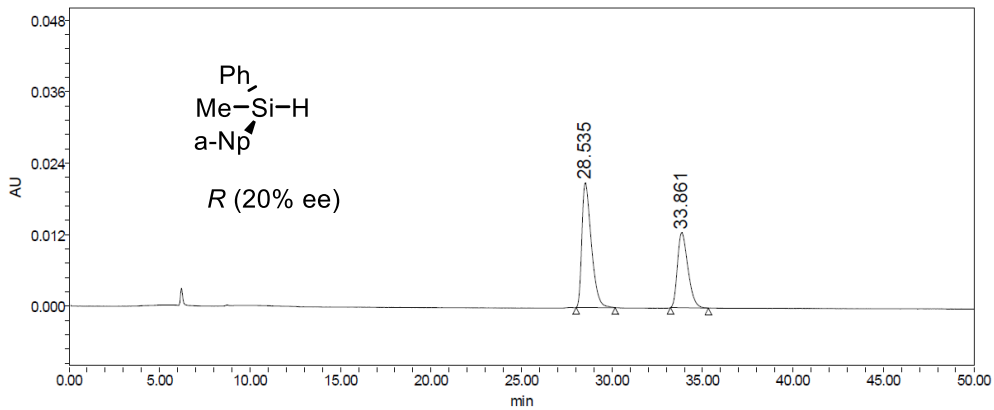

Channel: 2998 Ch1 254nm@1.2nm; Processed Channel: 2998 Ch1 254nm@1.2nm; Result Id: 21992; Processing Method: 11

**Processed Channel Descr.: 2998 Ch1 254nm@1.2nm**

|   | Processed Channel Descr. | RT     | Area   | Height | % Area |
|---|--------------------------|--------|--------|--------|--------|
| 1 | 2998 Ch1 254nm@1.2nm     | 28.535 | 755897 | 20919  | 59.93  |
| 2 | 2998 Ch1 254nm@1.2nm     | 33.861 | 505357 | 12605  | 40.07  |

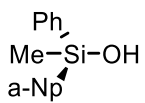

When an enantio-enriched (*R*)-methyl(naphthalen-1-yl)(phenyl)silane (20% ee) was tested, the same ee of the obtained silanol was maintained, suggesting the current transformation is a stereo-retentive oxidation process.

(*R*)-methyl(naphthalen-1-yl)(phenyl)silanol, colorless liquid, 20% ee. The obtained enantioenriched silanol was analyzed by HPLC [CHIRALPAK® AD-H, eluent: *n*-hexane/*i*-PrOH (97/3), 0.5 mL/min, 254 nm;  $t_R = 42$  min,  $t_S = 44$  min].

$^1\text{H NMR}$  (400 MHz, Chloroform-*d*)  $\delta$  8.13 (d,  $J = 8.2$  Hz, 1H), 7.93 (d,  $J = 8.2$  Hz, 1H), 7.88 (d,  $J = 7.8$  Hz, 1H), 7.82 (d,  $J = 6.7$  Hz, 1H), 7.71 – 7.58 (m, 2H), 7.53 – 7.45 (m, 2H), 7.44 – 7.33 (m, 4H), 2.39 (br s, 1H), 0.83 (s, 3H).

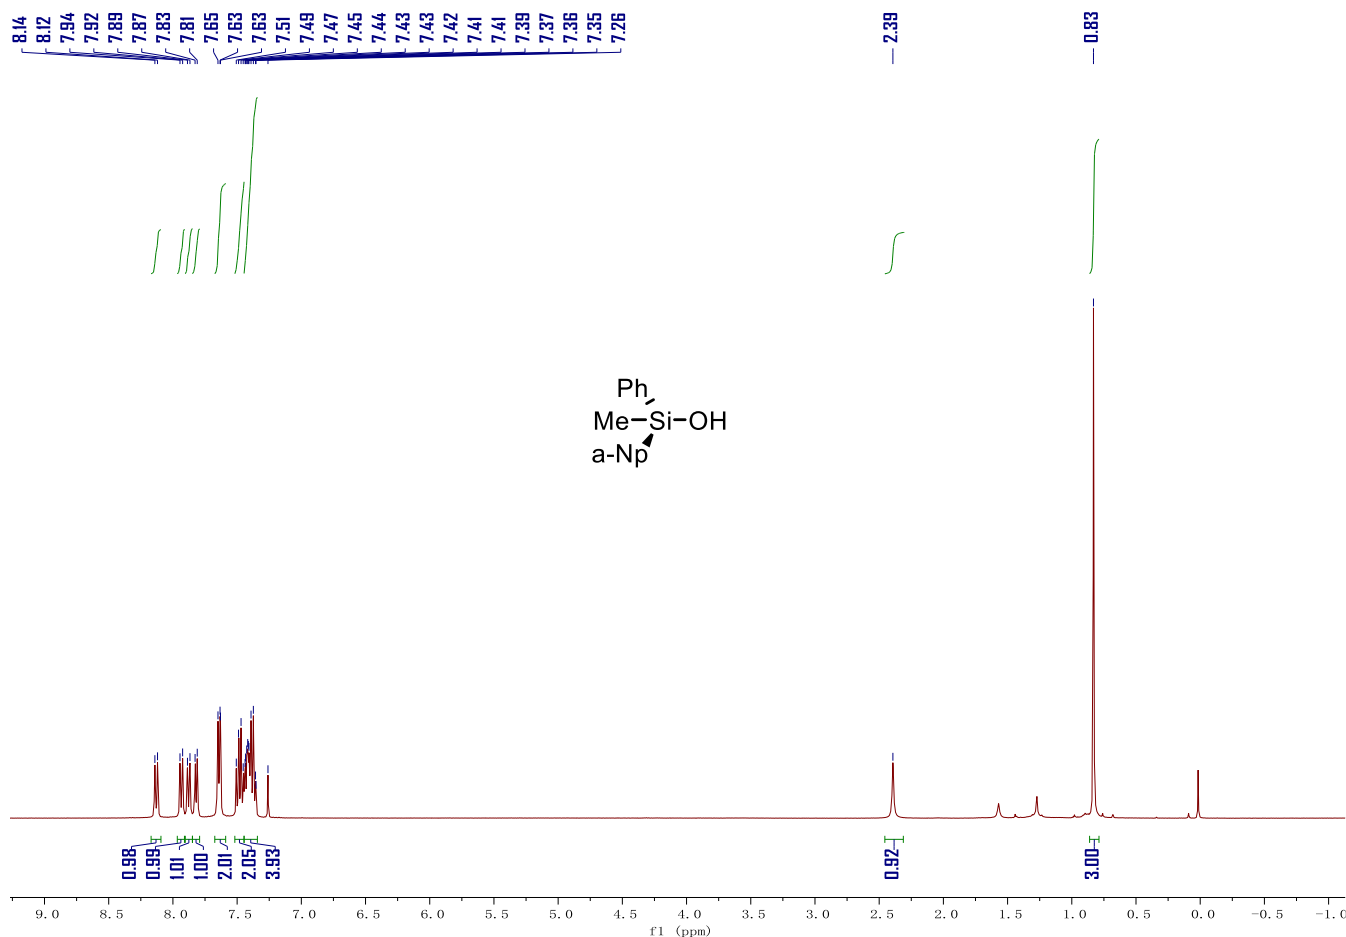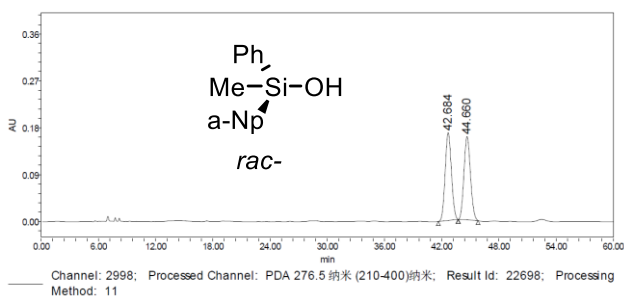

Processed Channel Descr.: PDA 276.5 纳米 (210-400) 纳米

|   | Processed Channel Descr.  | RT     | Area    | Height | % Area |
|---|---------------------------|--------|---------|--------|--------|
| 1 | PDA 276.5 纳米 (210-400) 纳米 | 42.684 | 7689824 | 168298 | 50.21  |
| 2 | PDA 276.5 纳米 (210-400) 纳米 | 44.660 | 7625103 | 159954 | 49.79  |

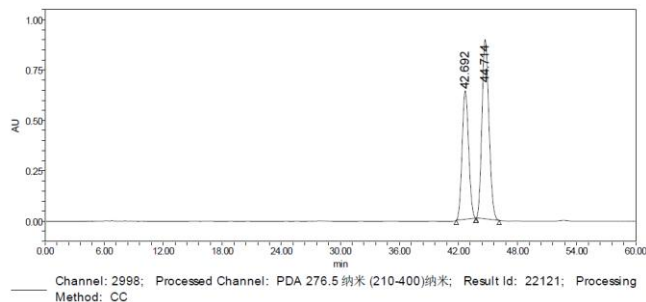

Processed Channel Descr.: PDA 276.5 纳米 (210-400) 纳米

|   | Processed Channel Descr.  | RT     | Area     | Height | % Area |
|---|---------------------------|--------|----------|--------|--------|
| 1 | PDA 276.5 纳米 (210-400) 纳米 | 42.692 | 29408499 | 637136 | 40.01  |
| 2 | PDA 276.5 纳米 (210-400) 纳米 | 44.714 | 44098089 | 889810 | 59.99  |

## 7.5 Investigation on the selectivity of silanol and disiloxane

Notably, the cobalt complexes (**K1** and **K2**), derived from their corresponding catalytic systems, both exhibited a 1:1 ratio of cobalt and the supporting ligand, as confirmed by X-ray diffraction analyses (A). Surprisingly, both complexes exhibited only catalytic activity on the hydroxylation of hydrosilane, in contrast to the current established ligand-controlled product selectivity (B). Interestingly, the presence of extra bathophenanthroline **L4** was capable to trigger the catalytic activity of complex **K2** in the formation of disiloxane (C). Further investigations of various organic and inorganic bases revealed bathophenanthroline **L4** most likely acted as a base to facilitate the formation of disiloxane, which was different from the function of ligand **L3** for preventing decomposition of cobalt complex **K1** during catalysis.

(A) Structures of cobalt phenanthroline complexes **K1** and **K2**

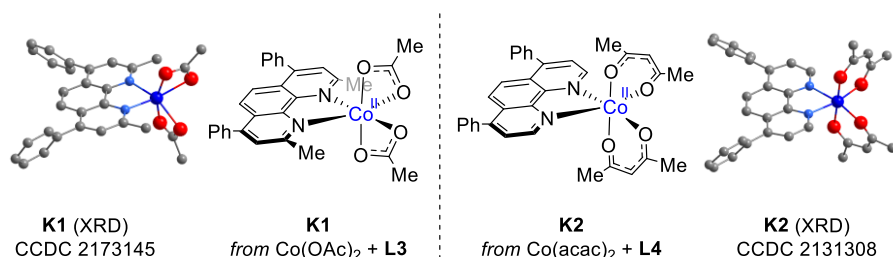

(B) Cobalt complexes **K1** and **K2** catalyzed hydroxylation of hydrosilane (**1a**)

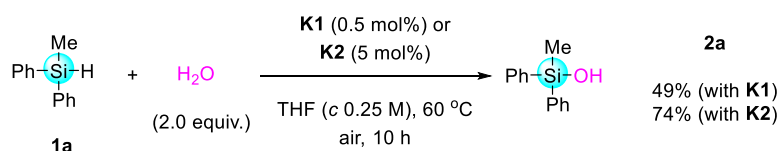

(C) Base-facilitated, cobalt complex **K2** catalyzed synthesis of disiloxane (**3a**)

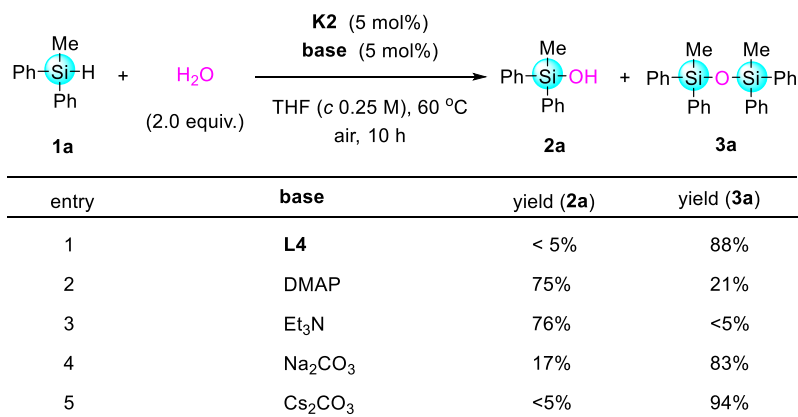

(D) Ligand-coordinated, cobalt complex **K1** catalyzed synthesis of silanol (**2a**)

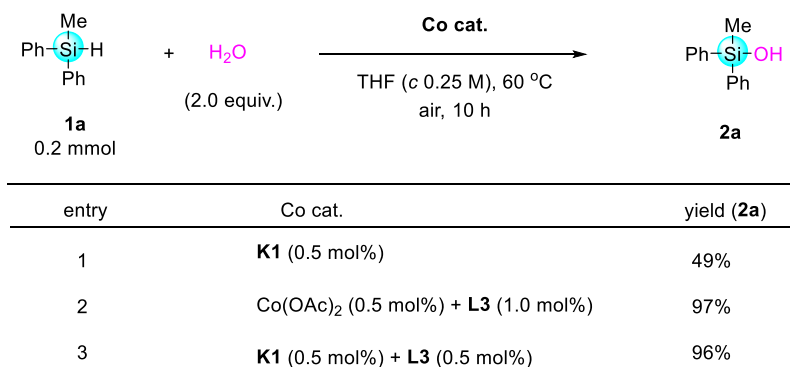

## 8. References

- (1) Wang, K.; Zhou, J.; Jiang, Y.; Zhang, M.; Wang, C.; Xue, D.; Tang, W.; Sun, H.; Xiao, J.; Li, C. *Angew. Chem. Int. Ed.* **2019**, *58*, 6380.
- (2) Liang, H.; Wang, L.-J.; Ji, Y.-X.; Wang, H.; Zhang, B. *Angew. Chem. Int. Ed.* **2021**, *60*, 1839.
- (3) Lee, Y.; Seomoon, D.; Kim, S.; Han, H.; Chang, S.; Lee, P. H. *J. Org. Chem.* **2004**, *69*, 1741.
- (4) Shimada, T.; Jorapur, Y. *Synlett* **2012**, *23*, 1633.
- (5) Milenin, S. A.; Ardabevskaia, S. N.; Novikov, R. A.; Solyev, P. N.; Tkachev, Y. V.; Volodin, A. D.; Korlyukov, A. A.; Muzafarov, A. M. *J. Organomet. Chem.* **2020**, *926*, 121497.
- (6) Patnaik, S.; Kanbur, U.; Ellern, A.; Sadow, A. D. *Chemistry – A European Journal* **2021**, *27*, 10428.
- (7) Schafer, A. G.; Wieting, J. M.; Mattson, A. E. *Org. Lett.* **2011**, *13*, 5228.
- (8) Luo, N.; Liao, J.; Ouyang, L.; Wen, H.; Zhong, Y.; Liu, J.; Tang, W.; Luo, R. *Organometallics* **2020**, *39*, 165.
- (9) Van Genabeek, B.; de Waal, B. F. M.; Gosens, M. M. J.; Pitet, L. M.; Palmans, A. R. A.; Meijer, E. W., *J. Am. Chem. Soc.* **2016**, *138*, 4210-4218.
- (10) Arzumanyan, A. V.; Goncharova, I. K.; Novikov, R. A.; Milenin, S. A.; Boldyrev, K. L.; Solyev, P. N.; Tkachev, Y. V.; Volodin, A. D.; Smol'yakov, A. F.; Korlyukov, A. A.; Muzafarov, A. M., *Green Chem.* **2018**, *20*, 1467-1471.

## 9. NMR spectra

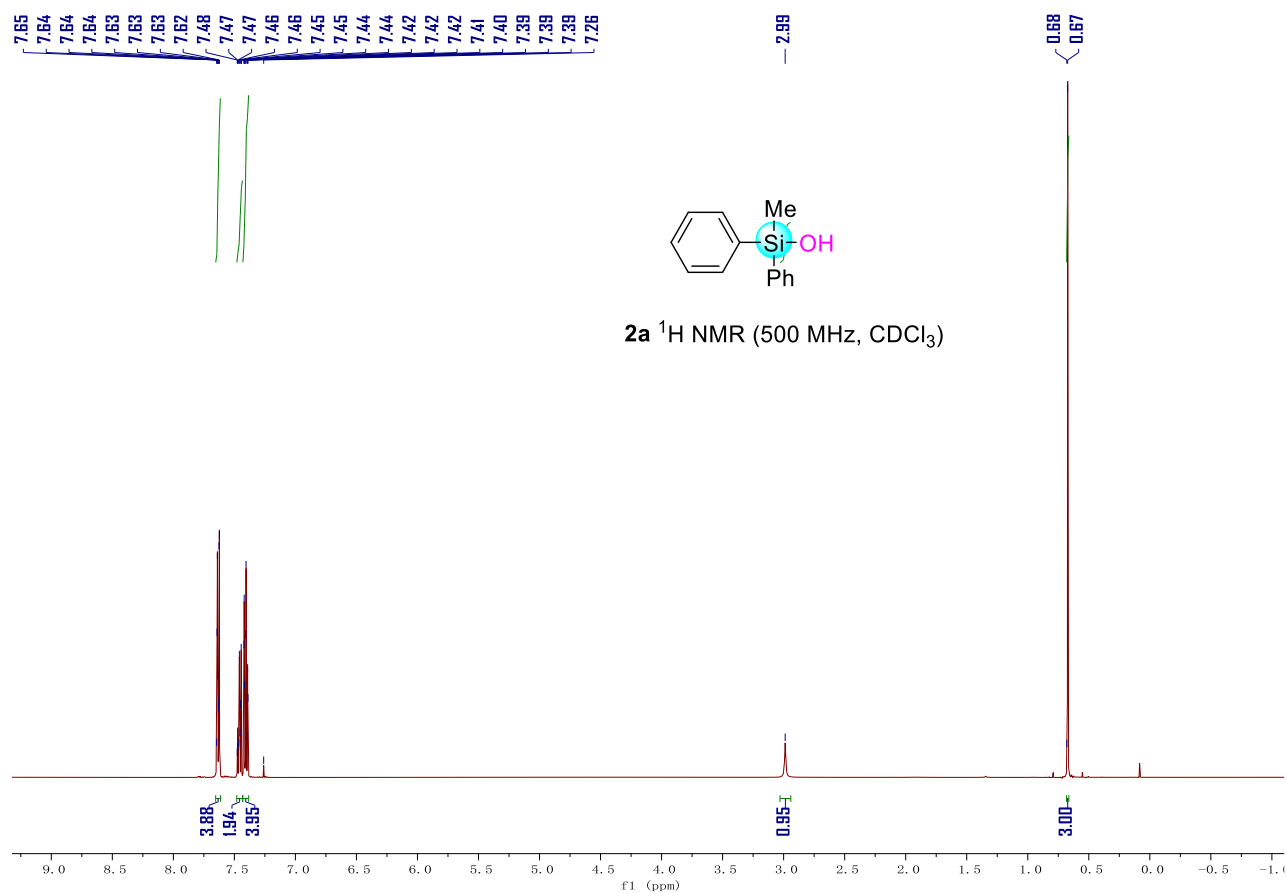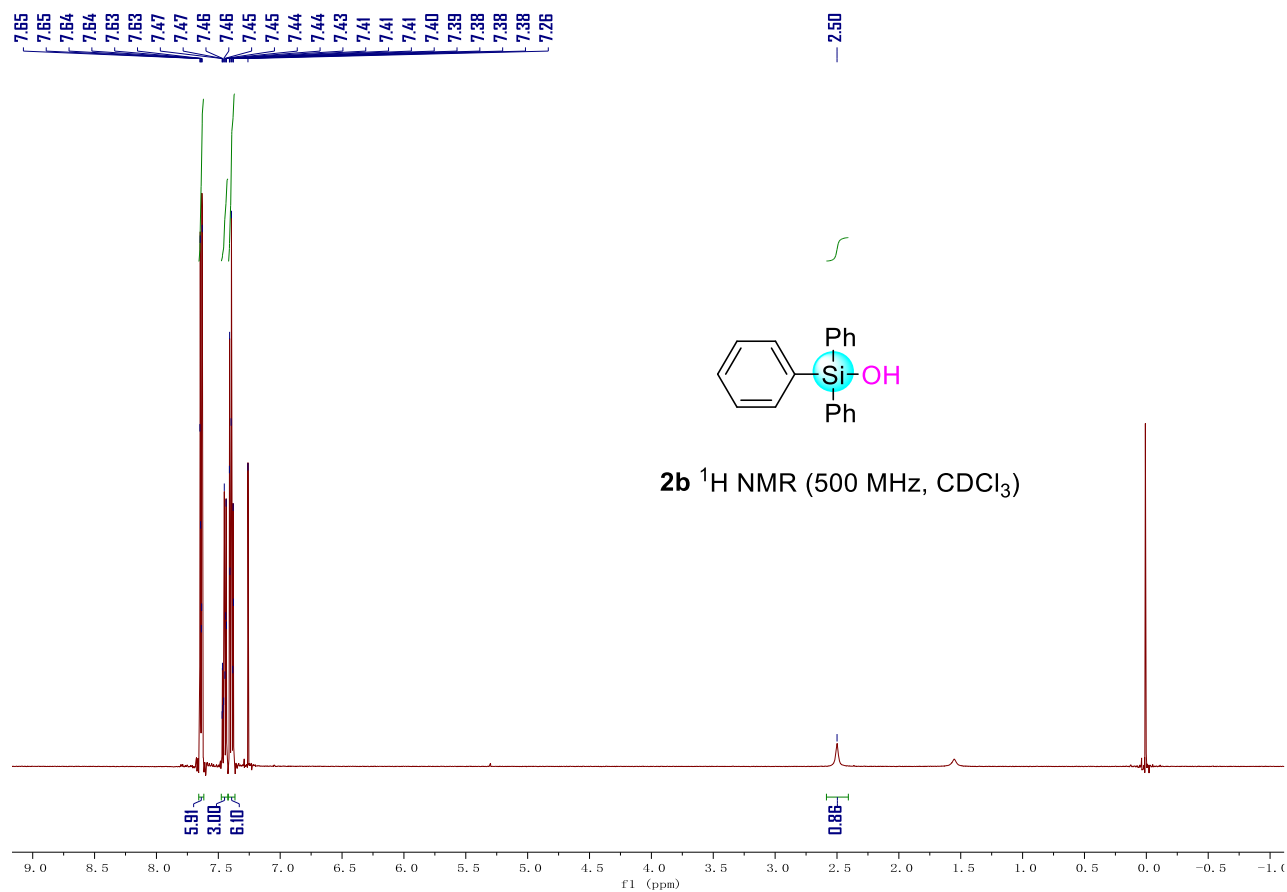

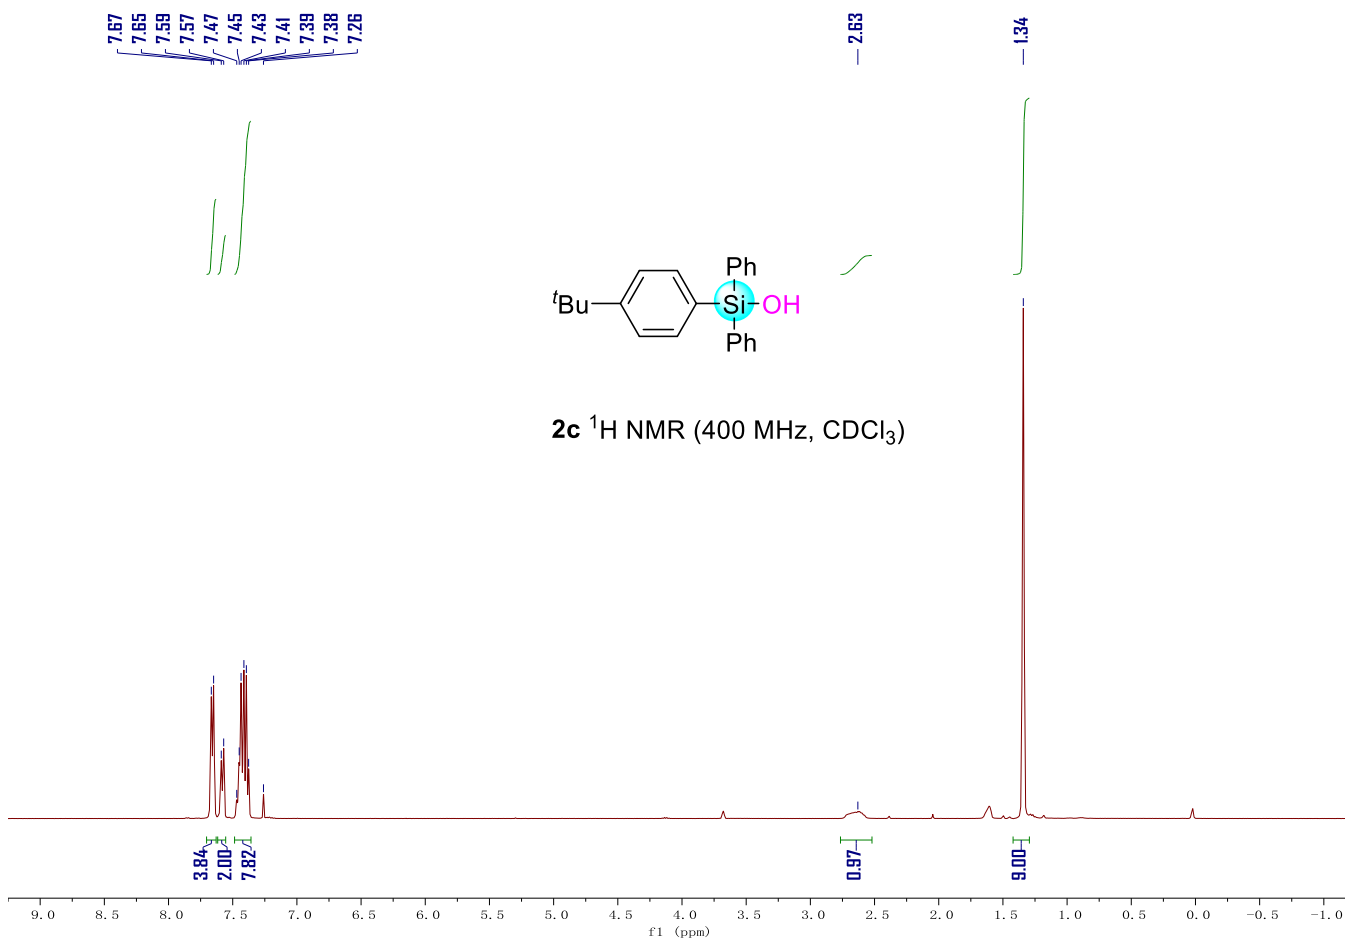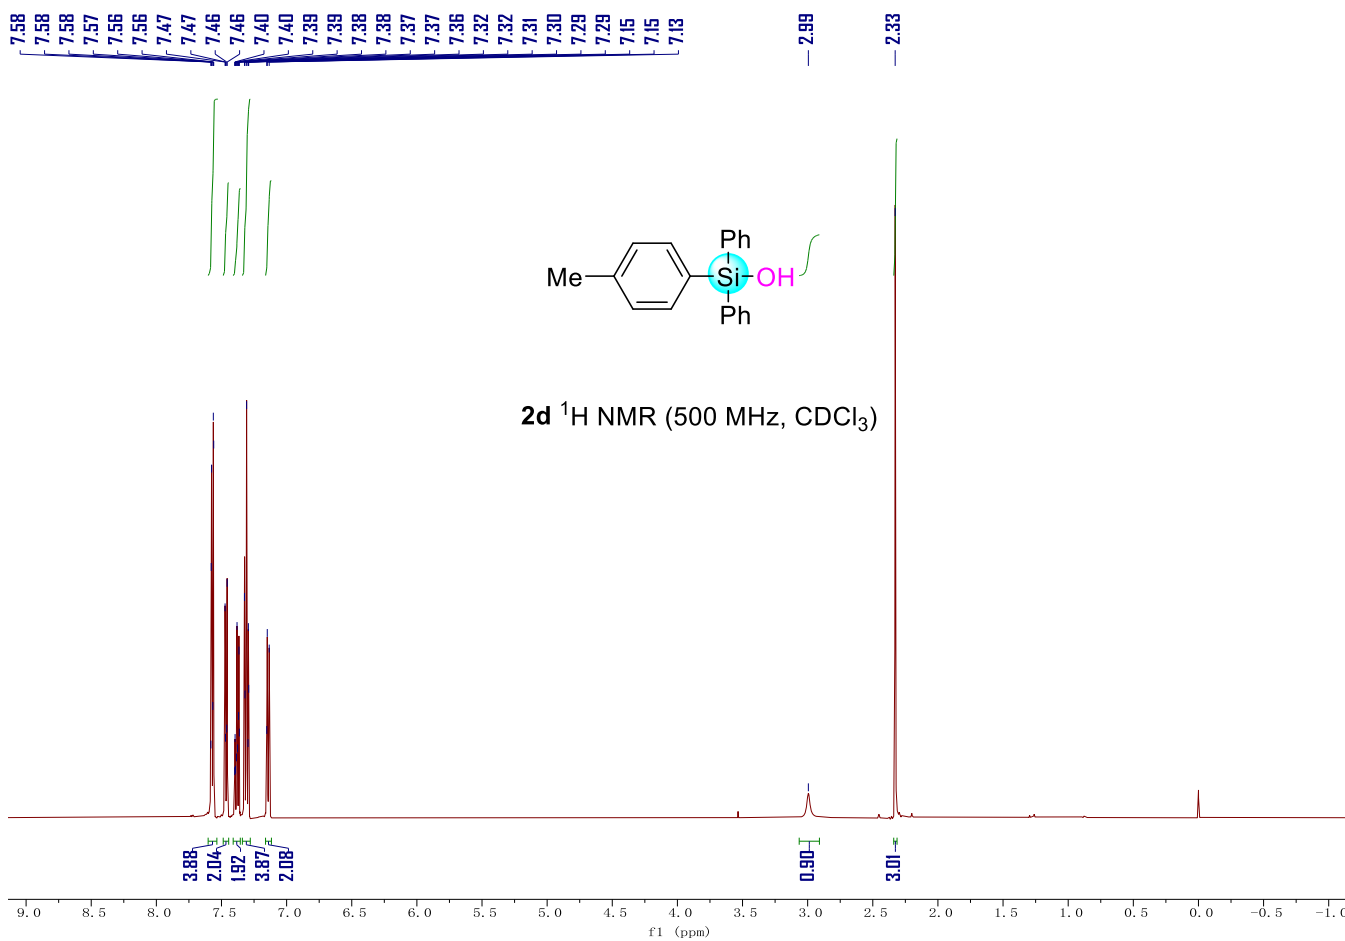

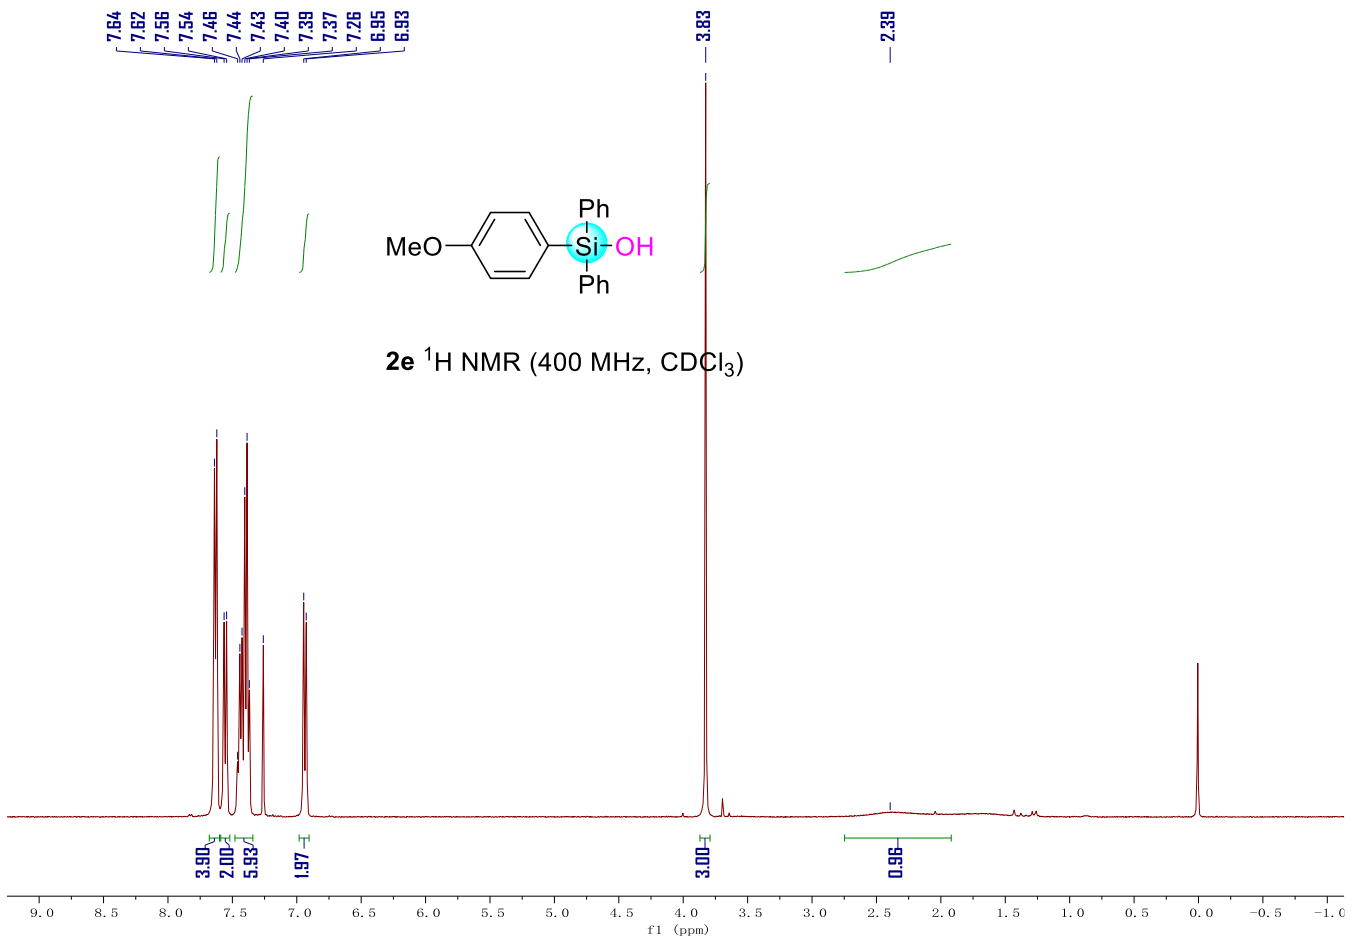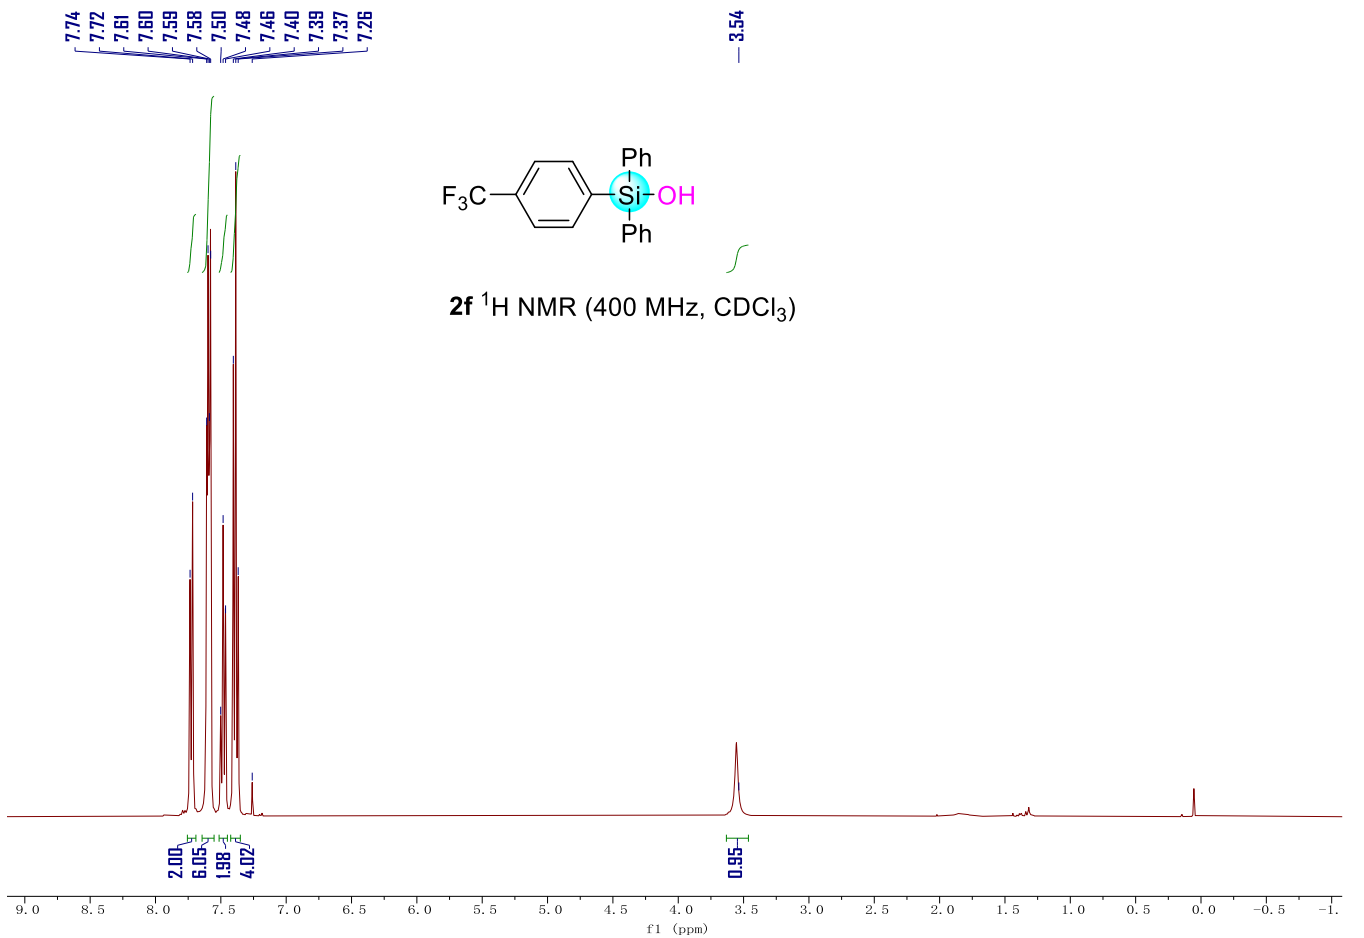



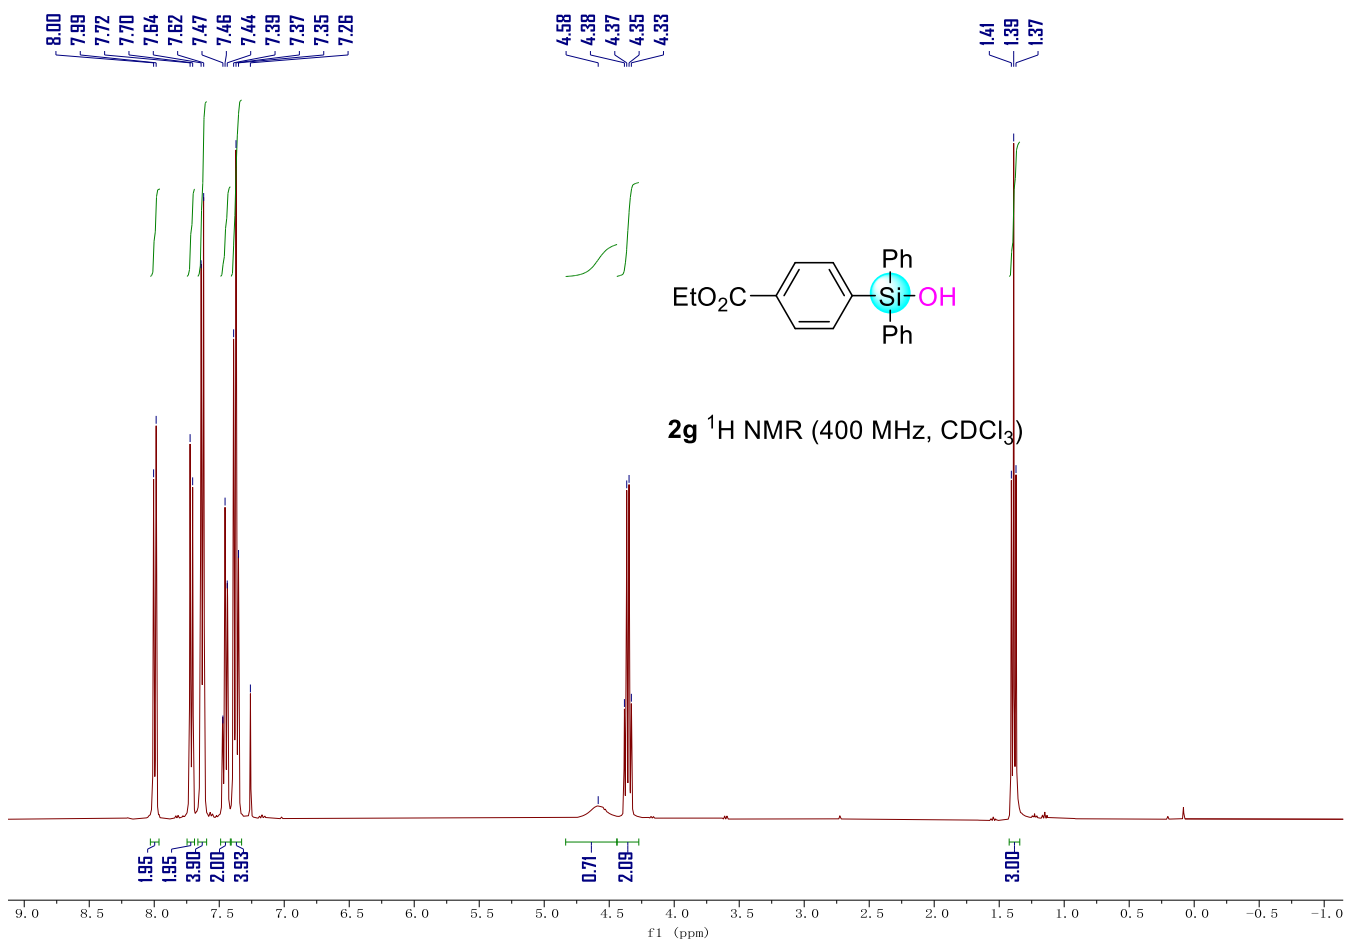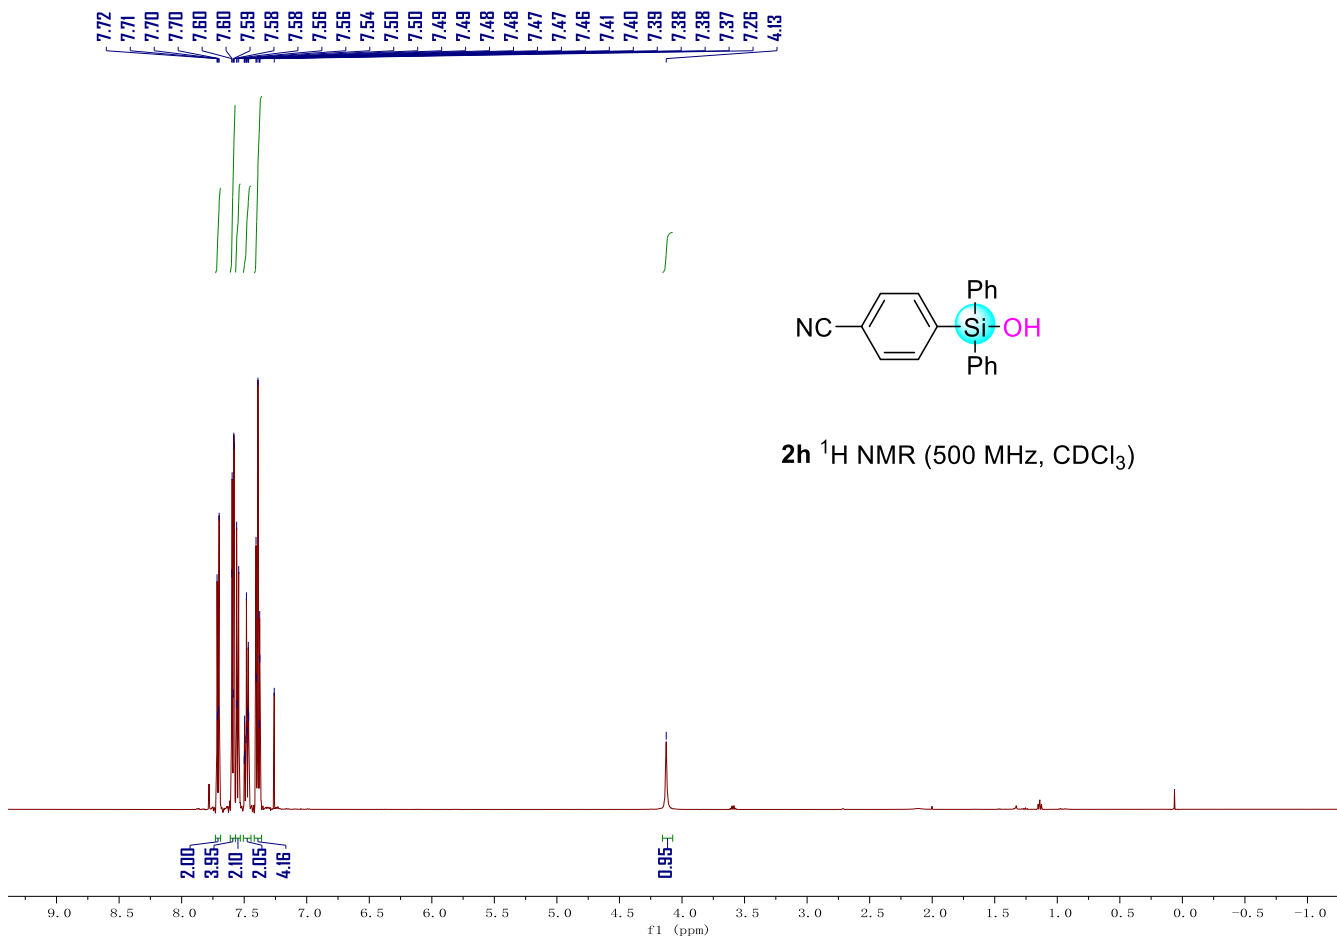

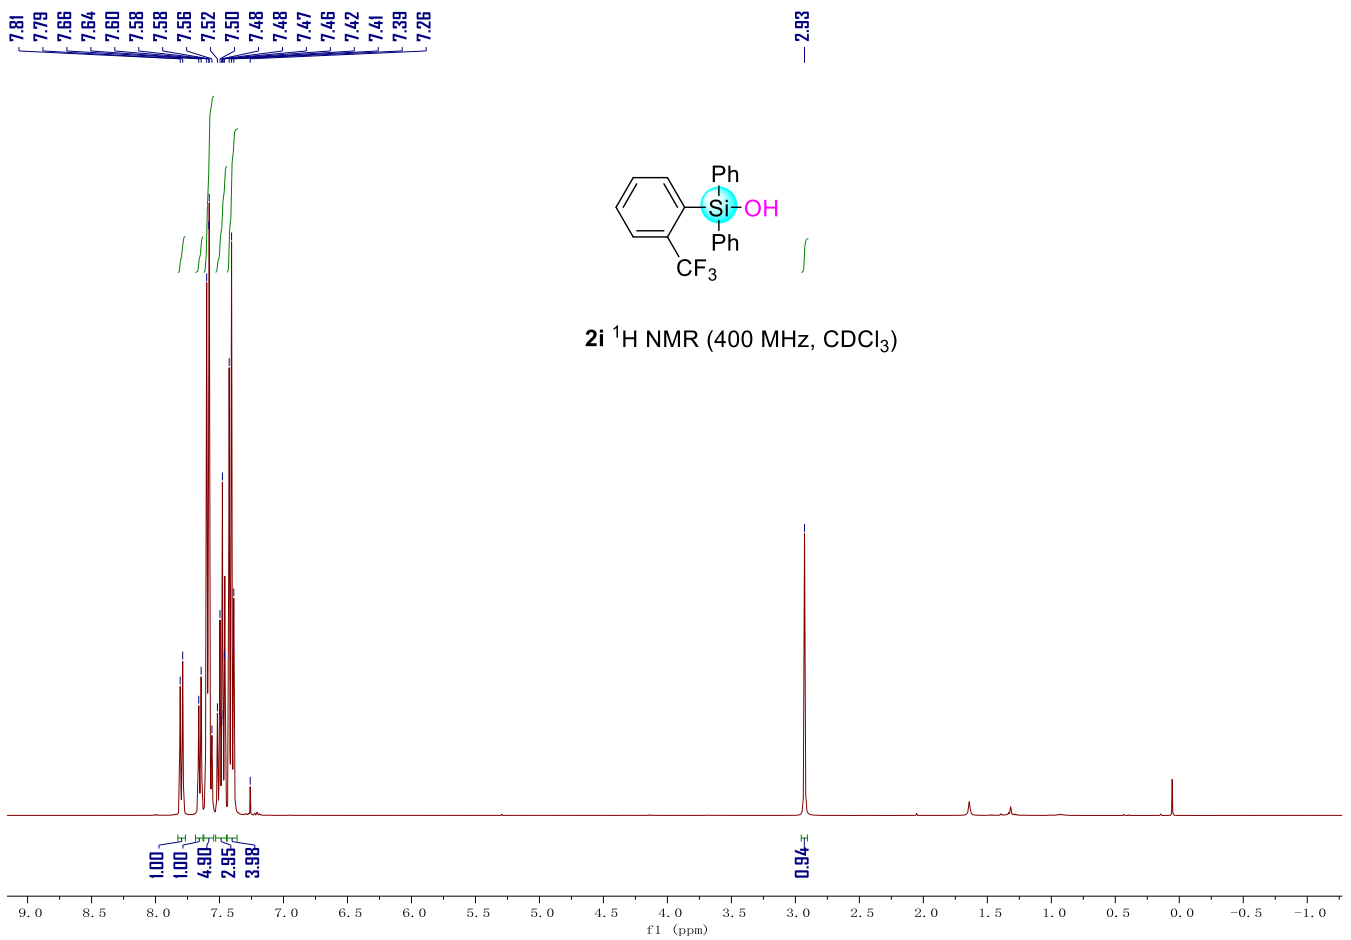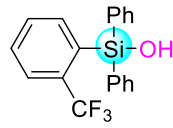

2i <sup>1</sup>H NMR (400 MHz, CDCl<sub>3</sub>)

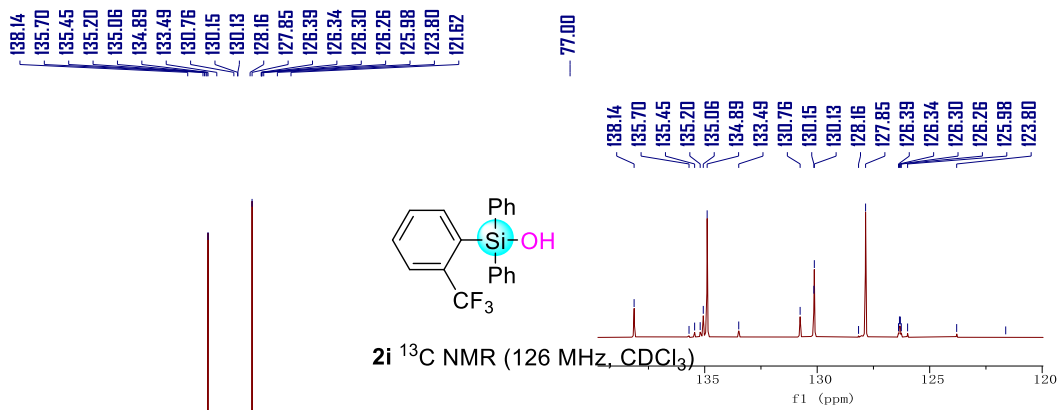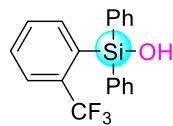

2i <sup>13</sup>C NMR (126 MHz, CDCl<sub>3</sub>)

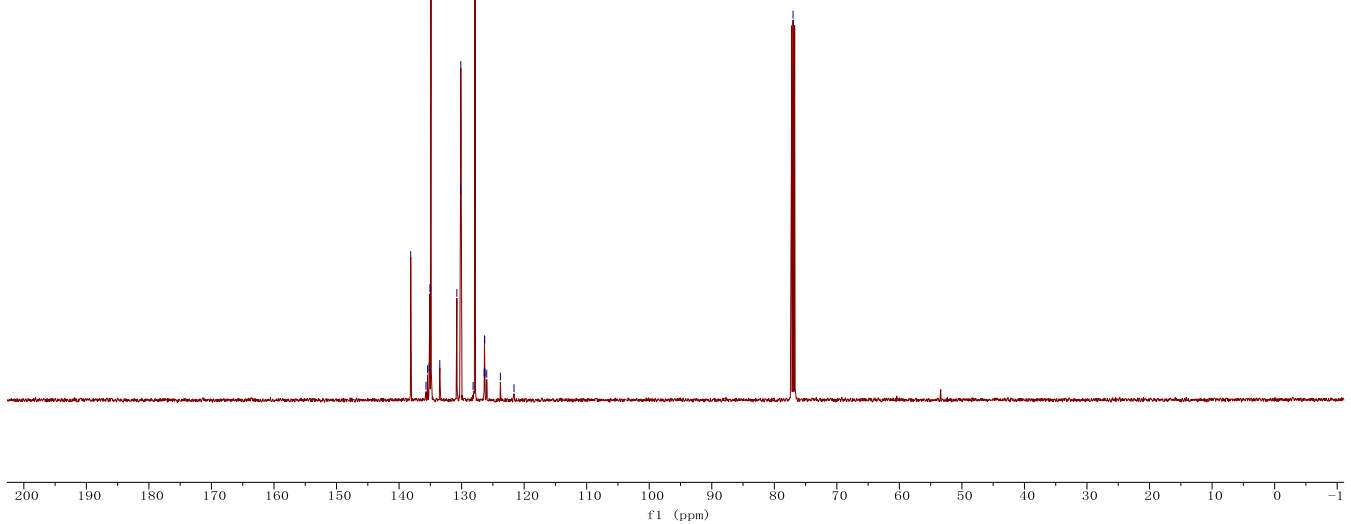

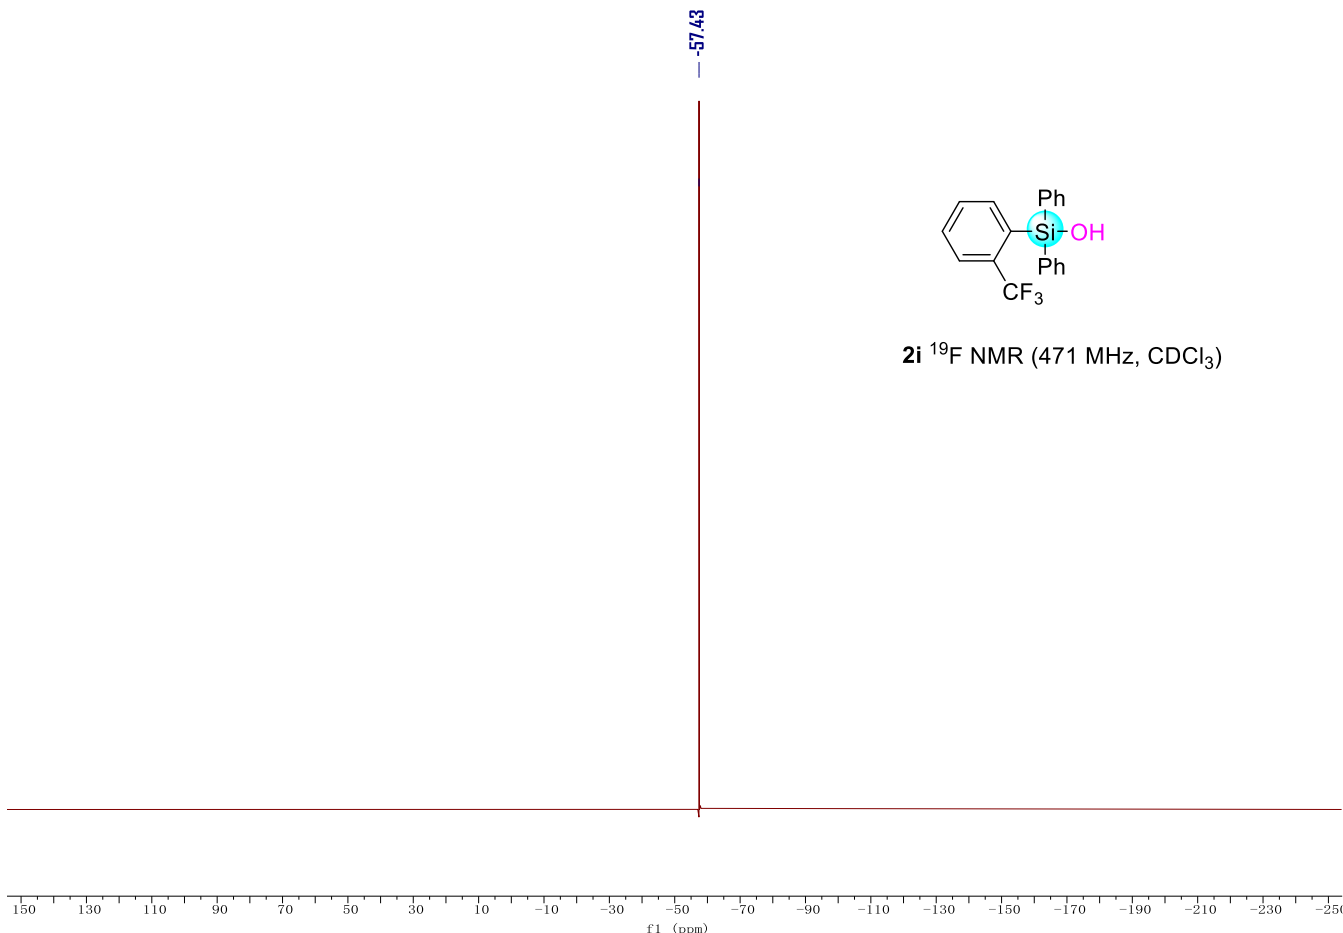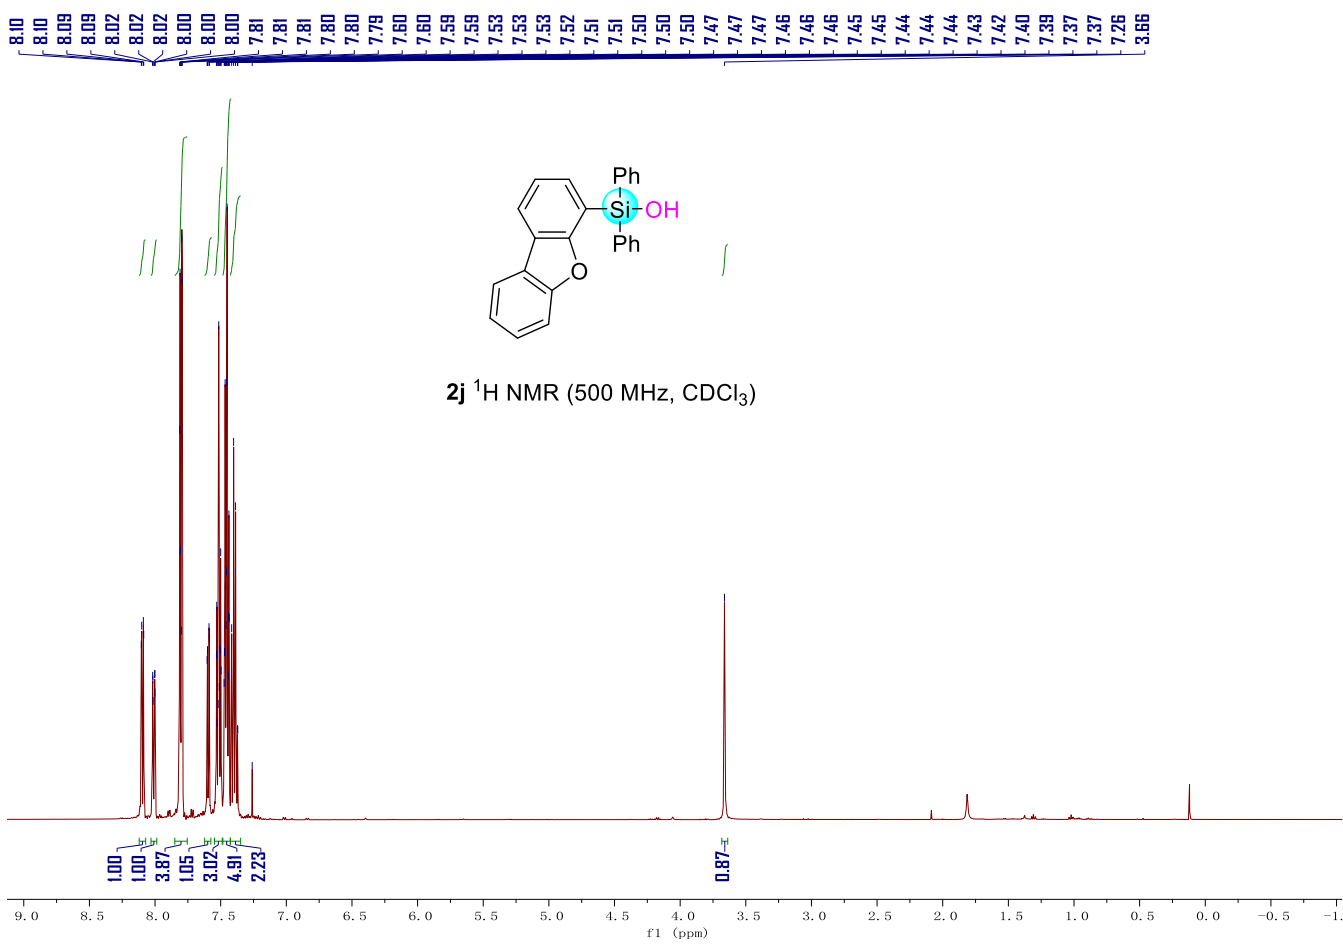

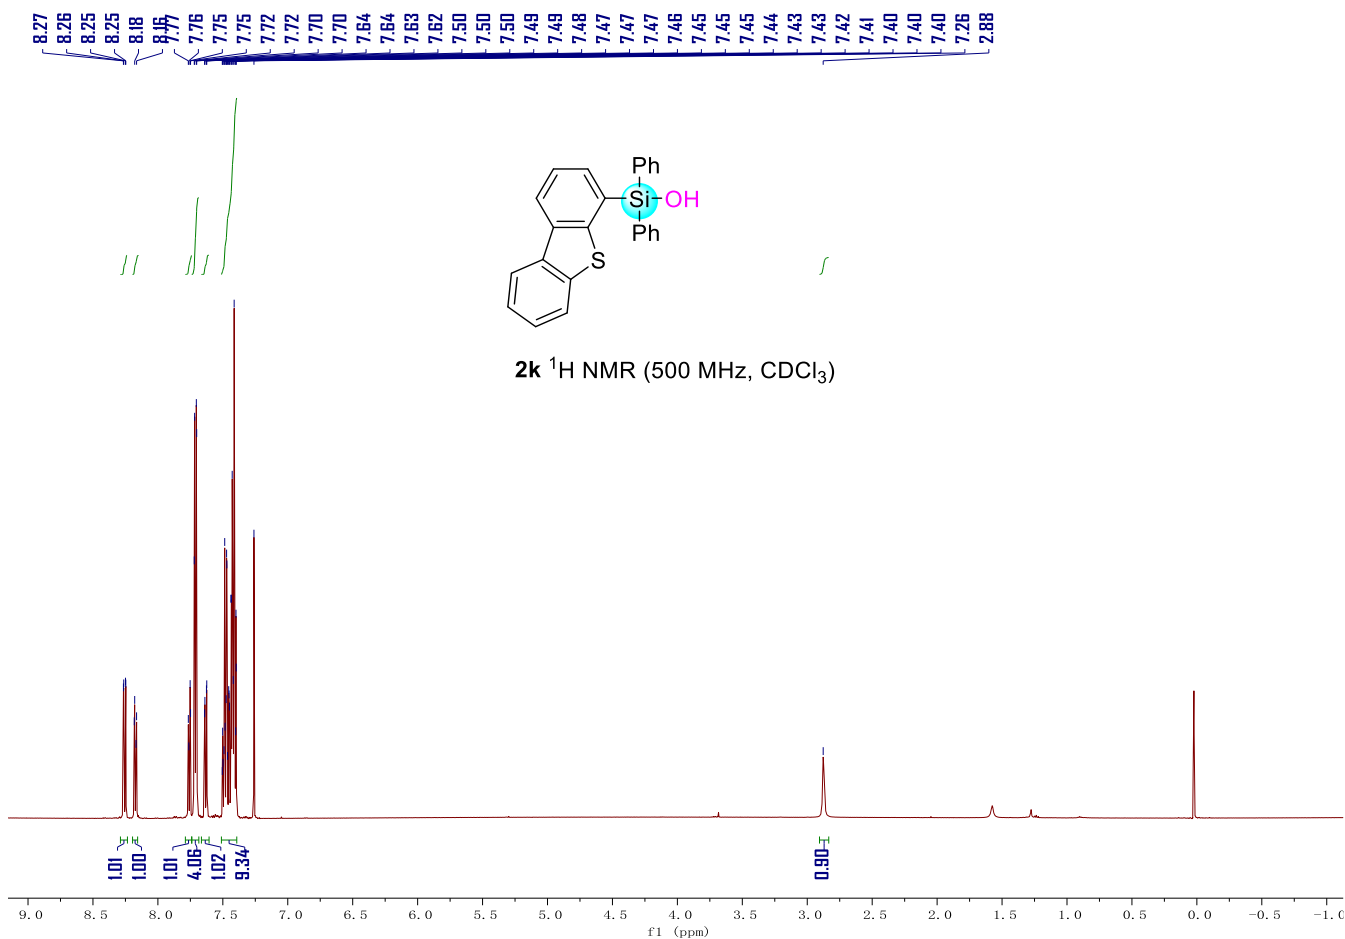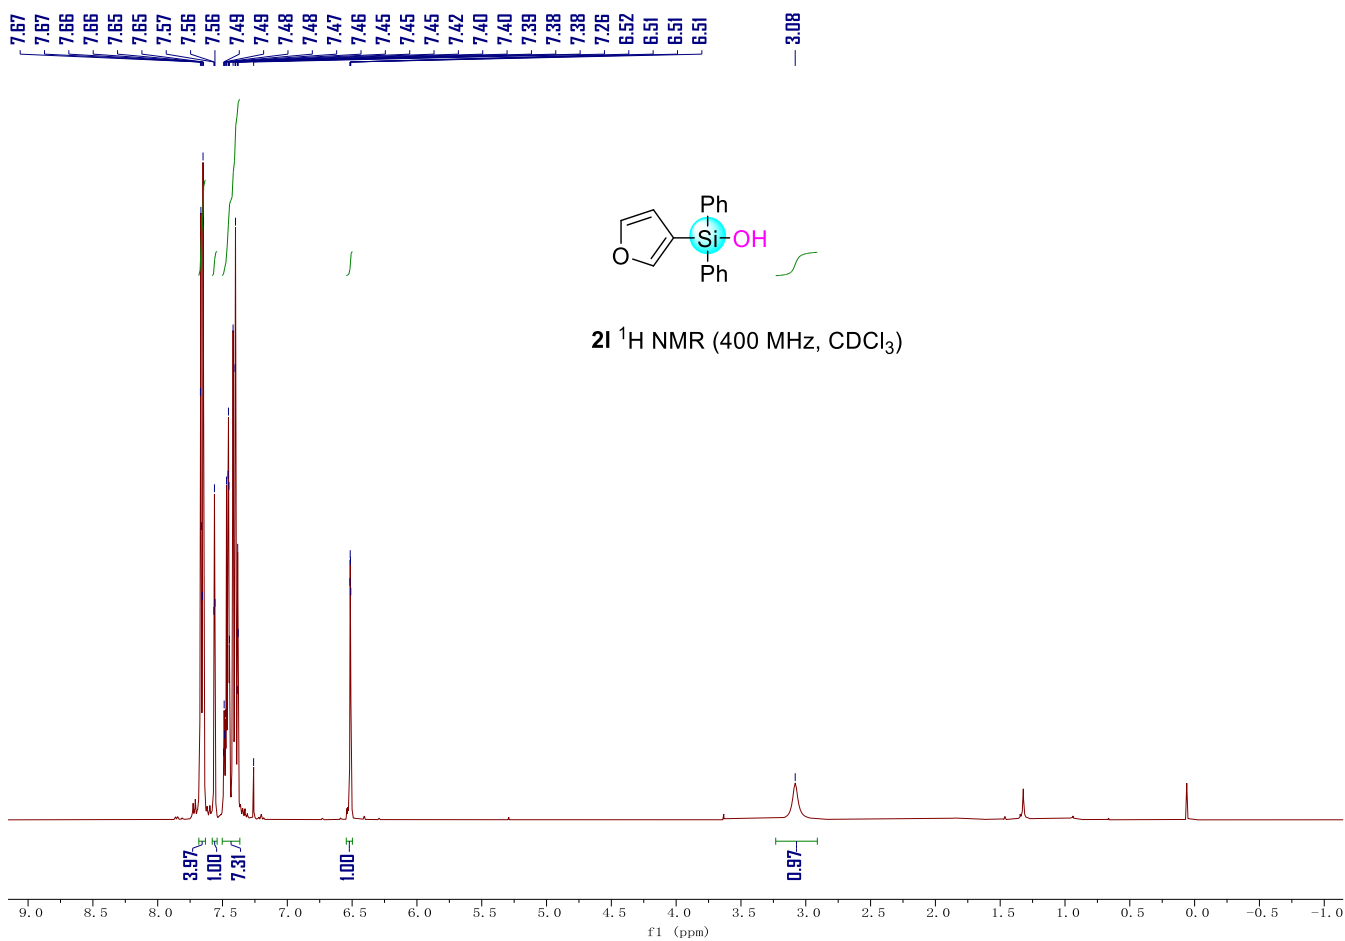

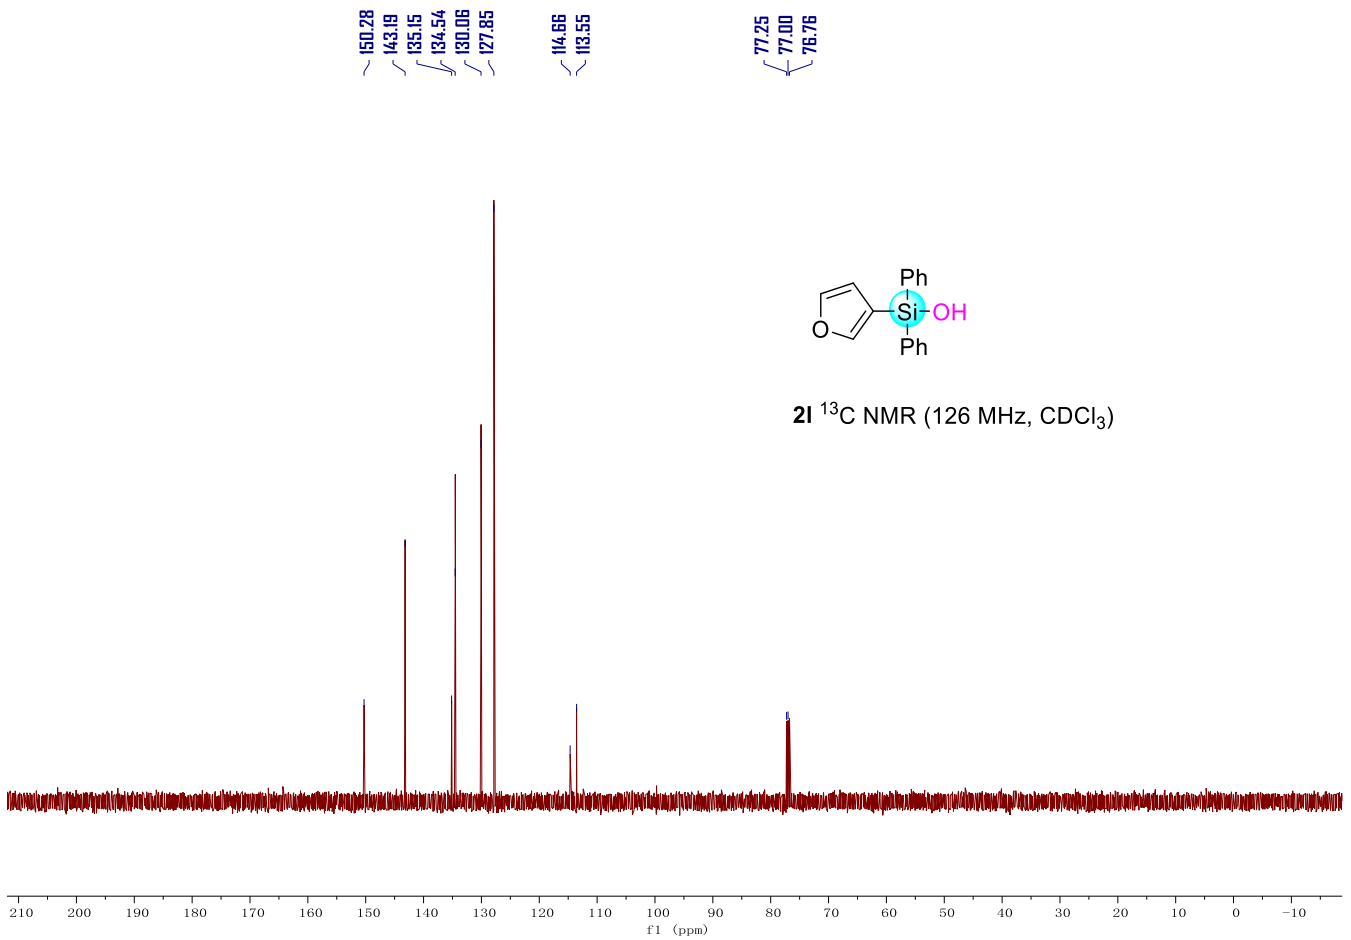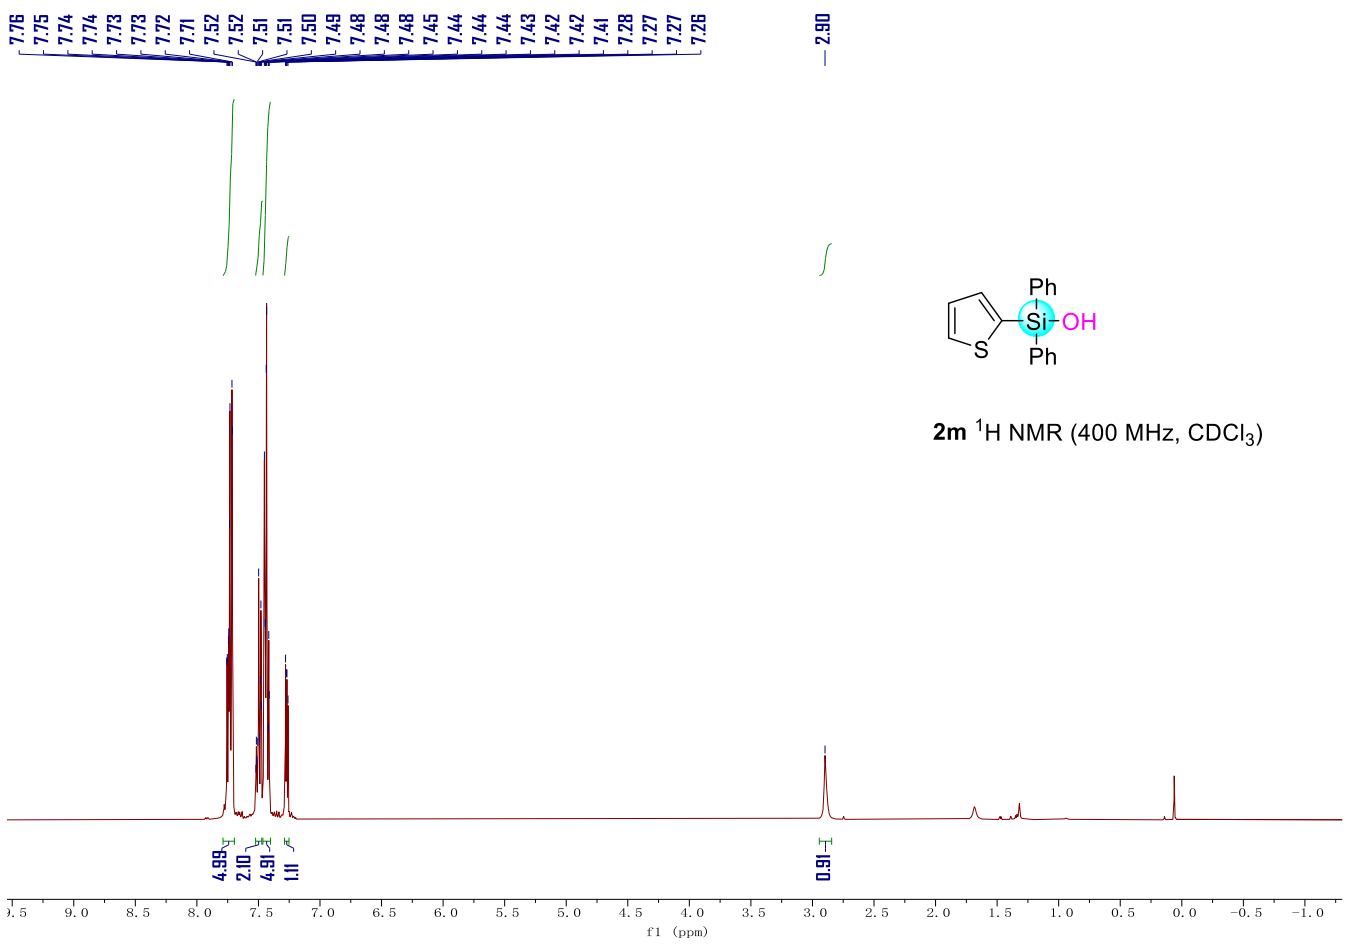

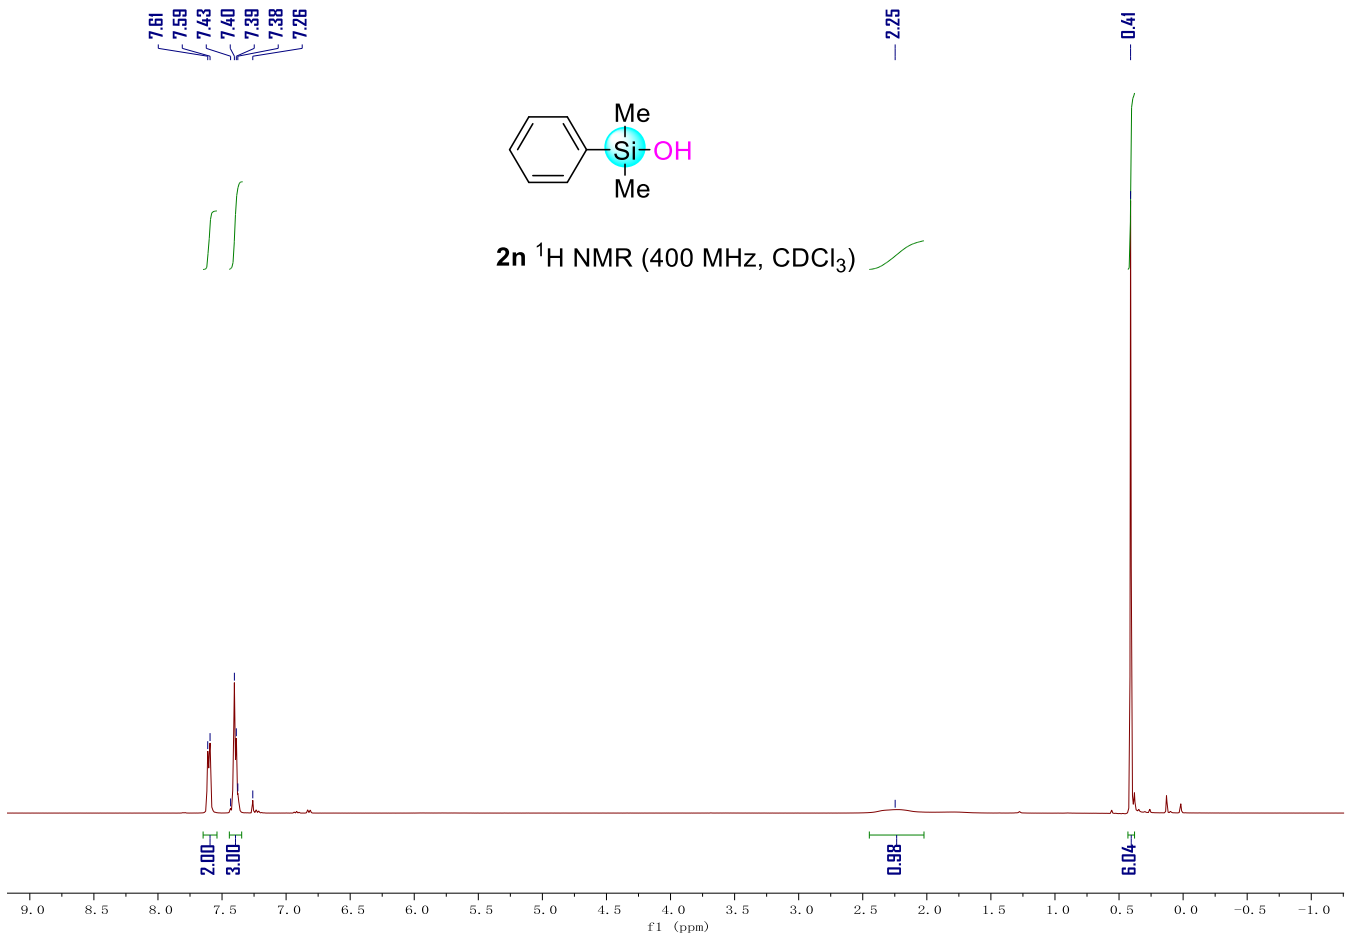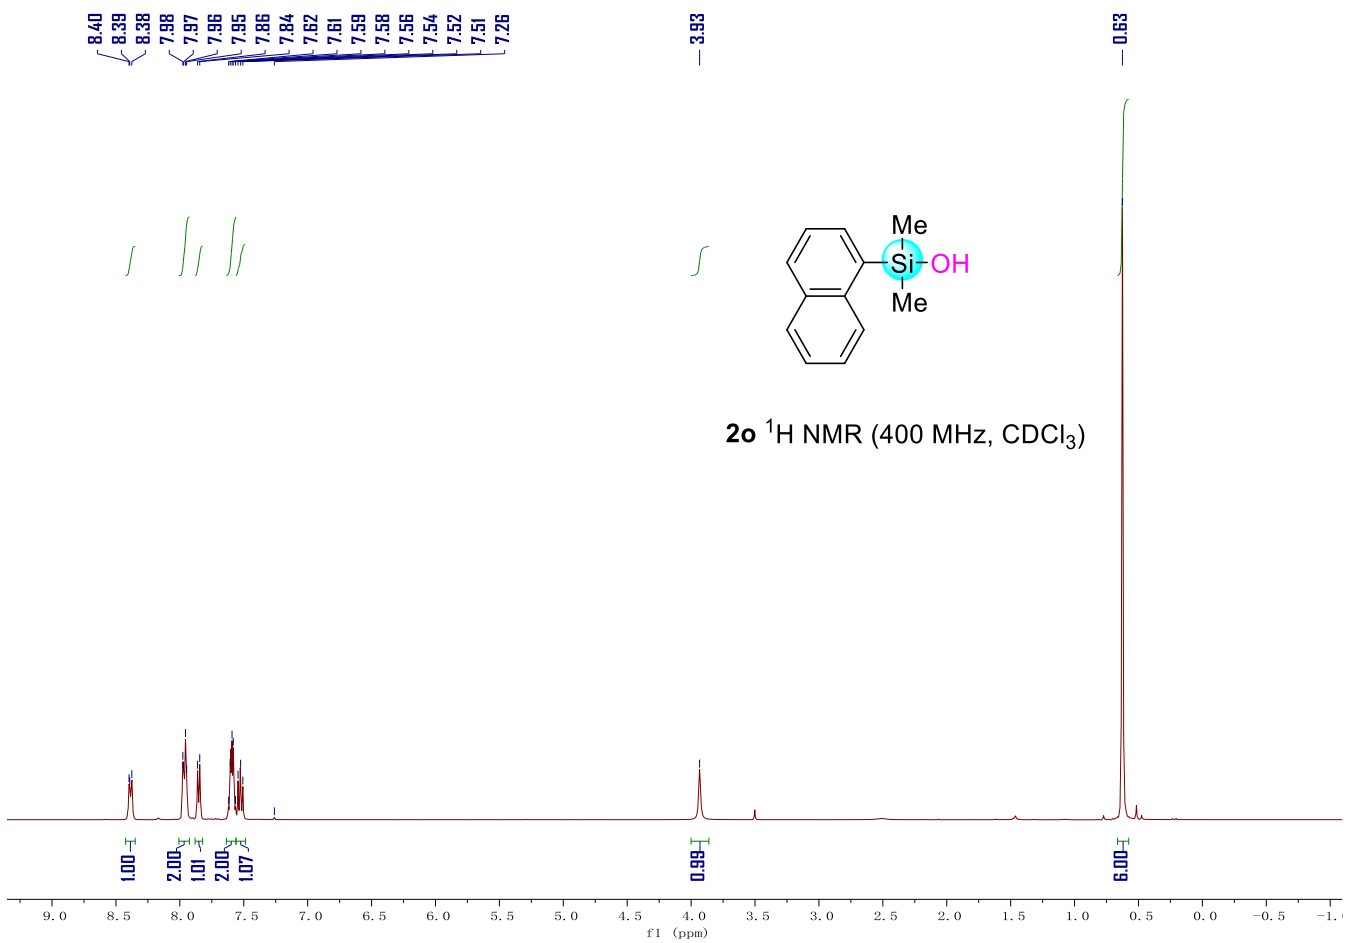

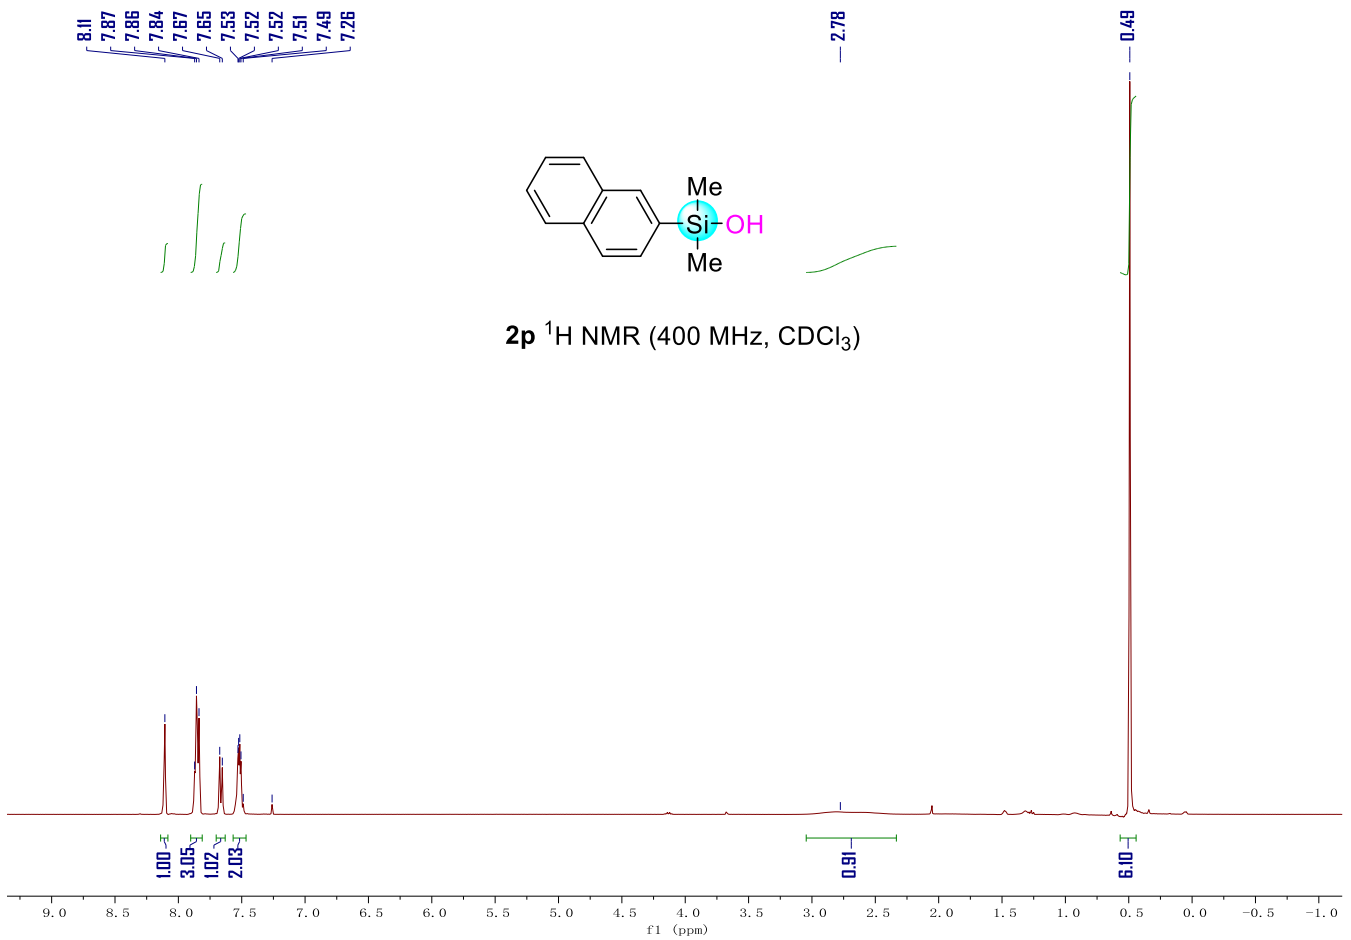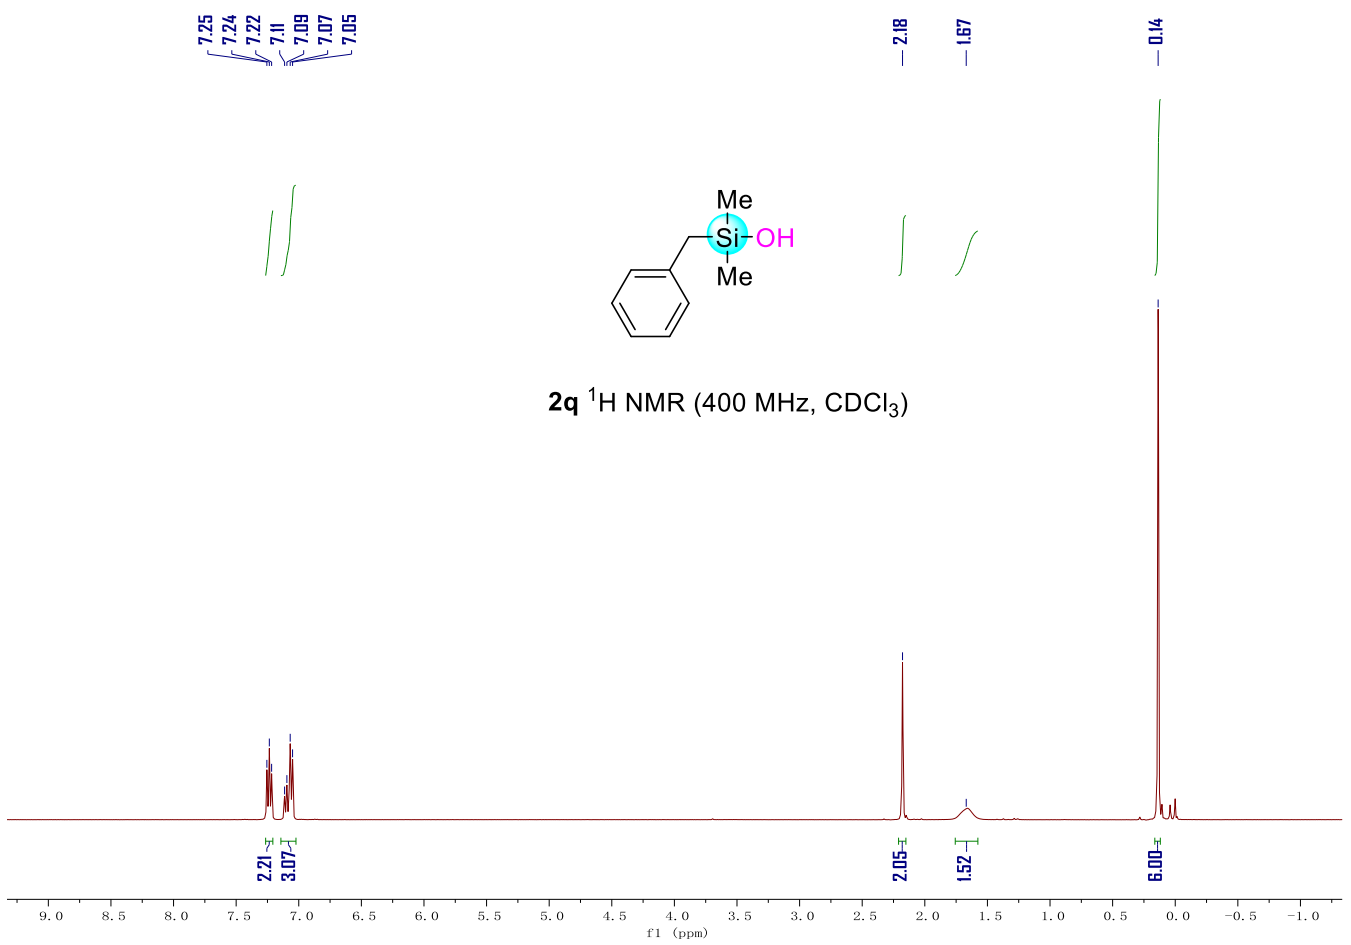

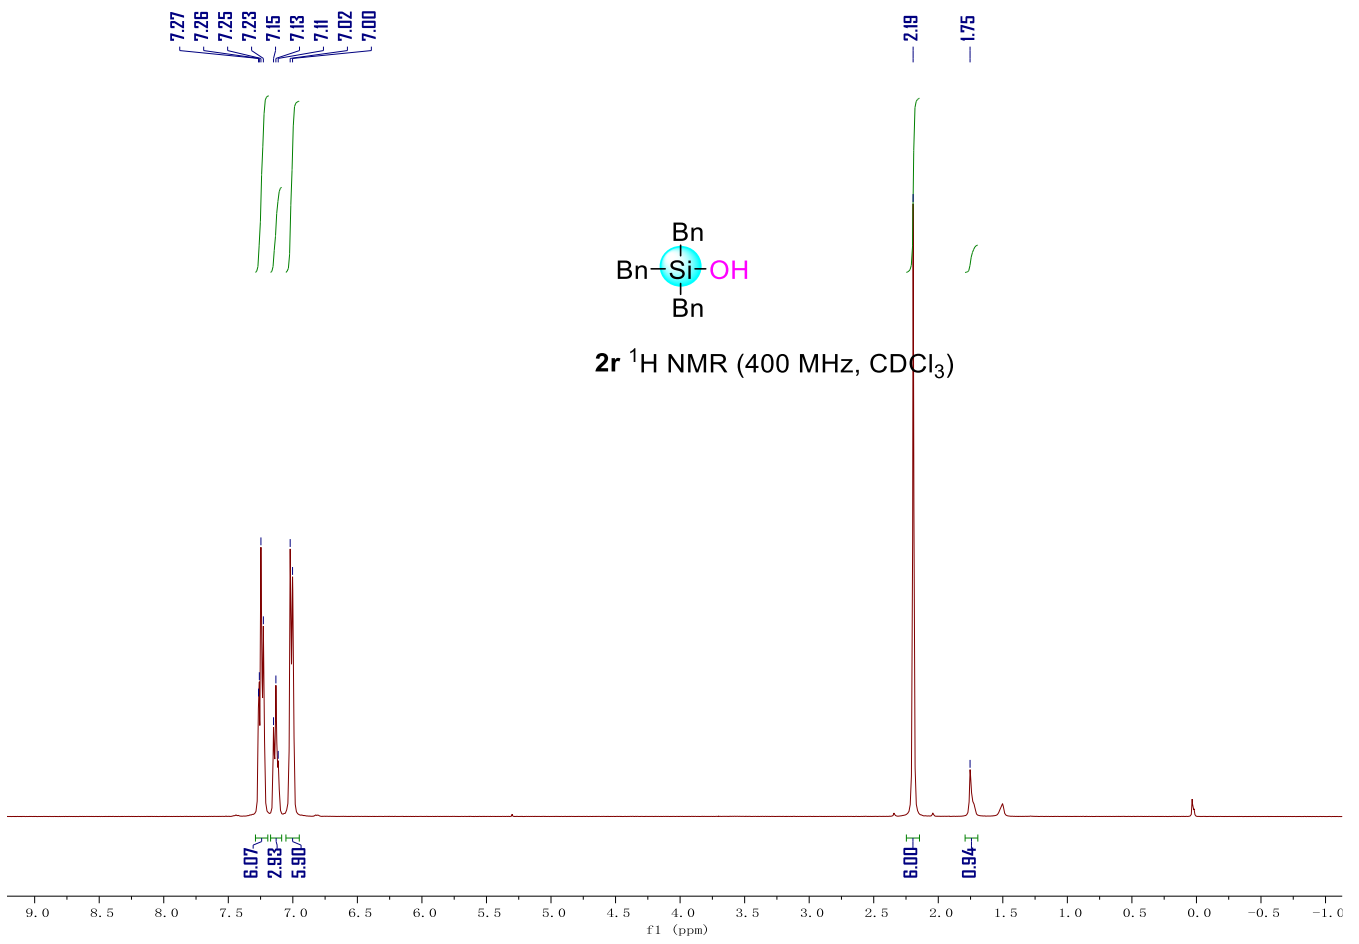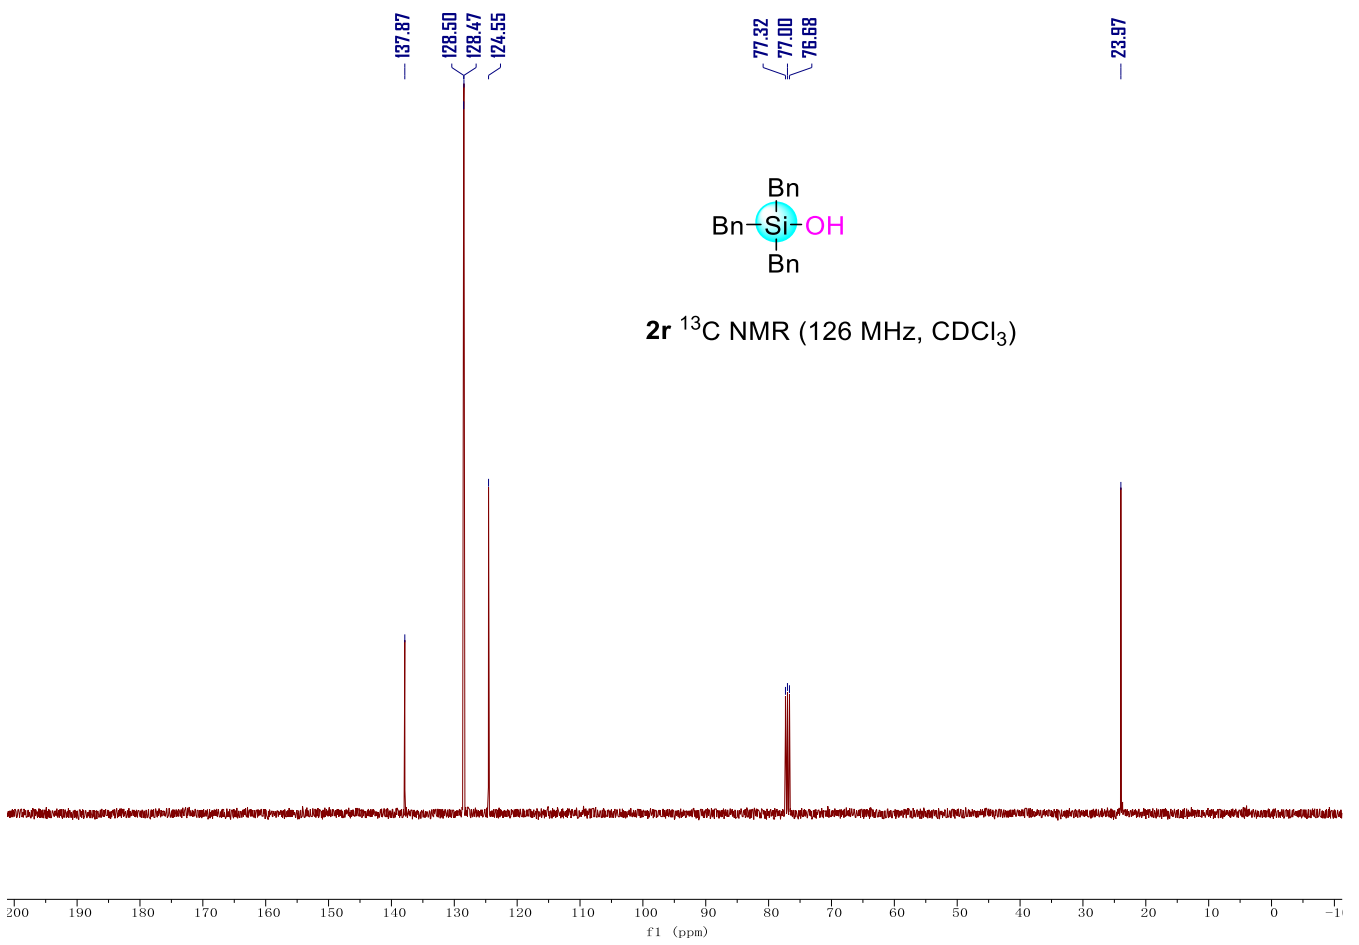



7.65  
7.64  
7.62  
7.46  
7.44  
7.43  
7.40  
7.39  
7.37  
7.26

2.51

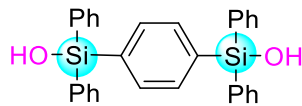

2s  $^1\text{H}$  NMR (400 MHz,  $\text{CDCl}_3$ )

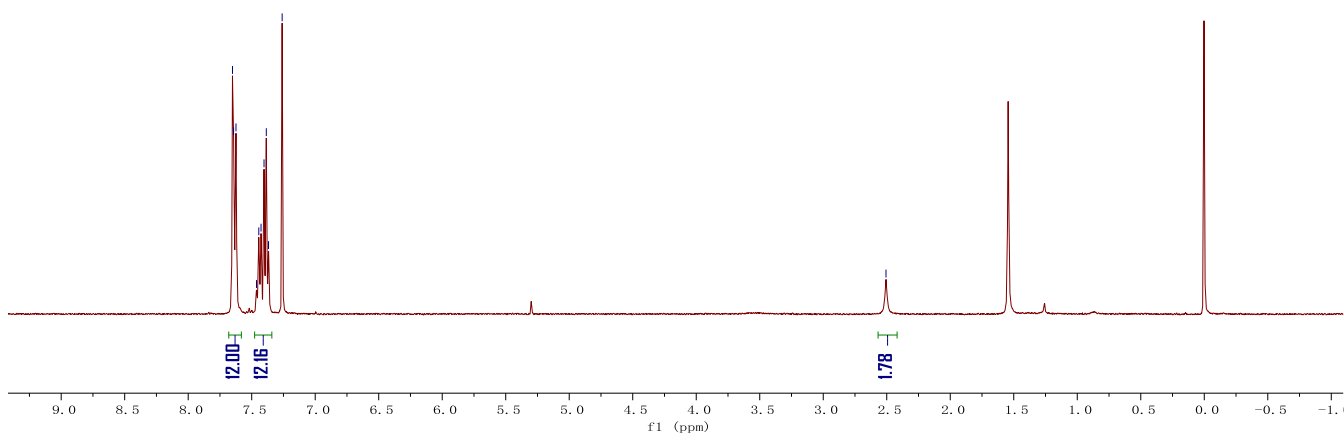

138.07  
136.32  
134.46  
133.69  
129.66  
127.76

40.12  
39.92  
39.71  
39.50  
39.29  
39.08  
38.87

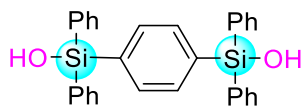

2s  $^{13}\text{C}$  NMR (101 MHz,  $\text{DMSO-d}_6$ )

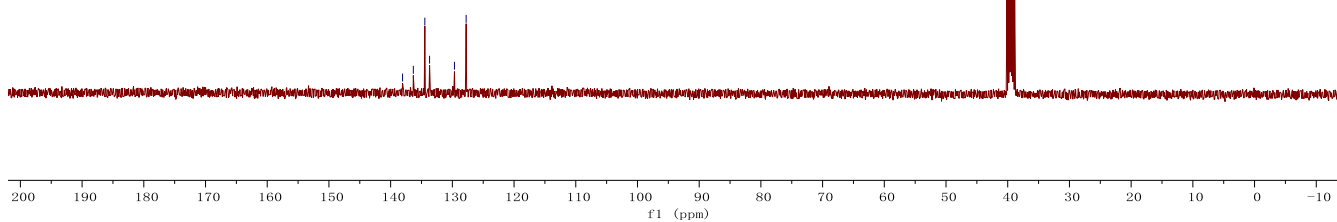

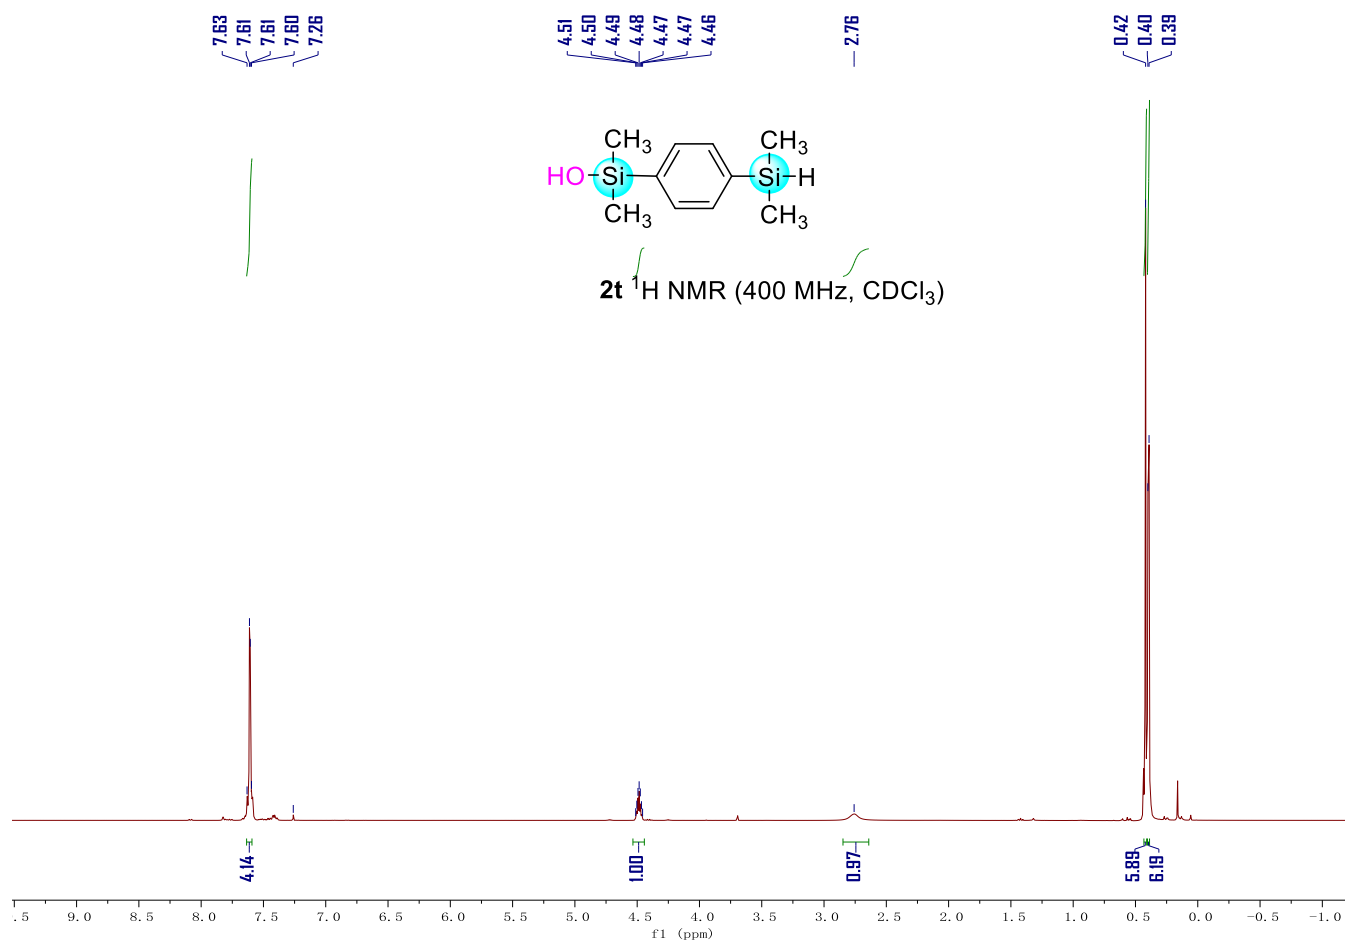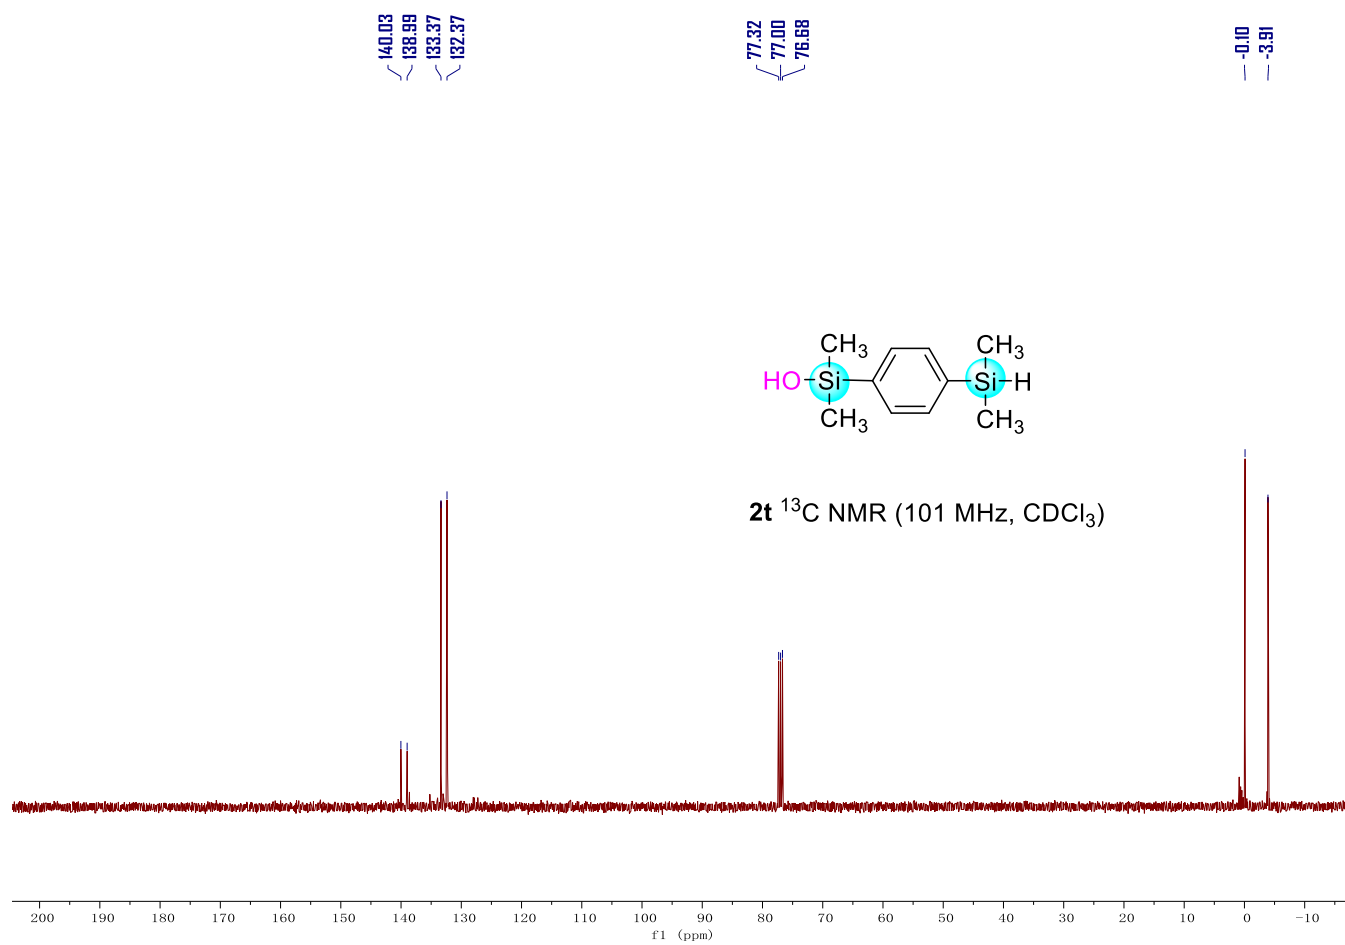

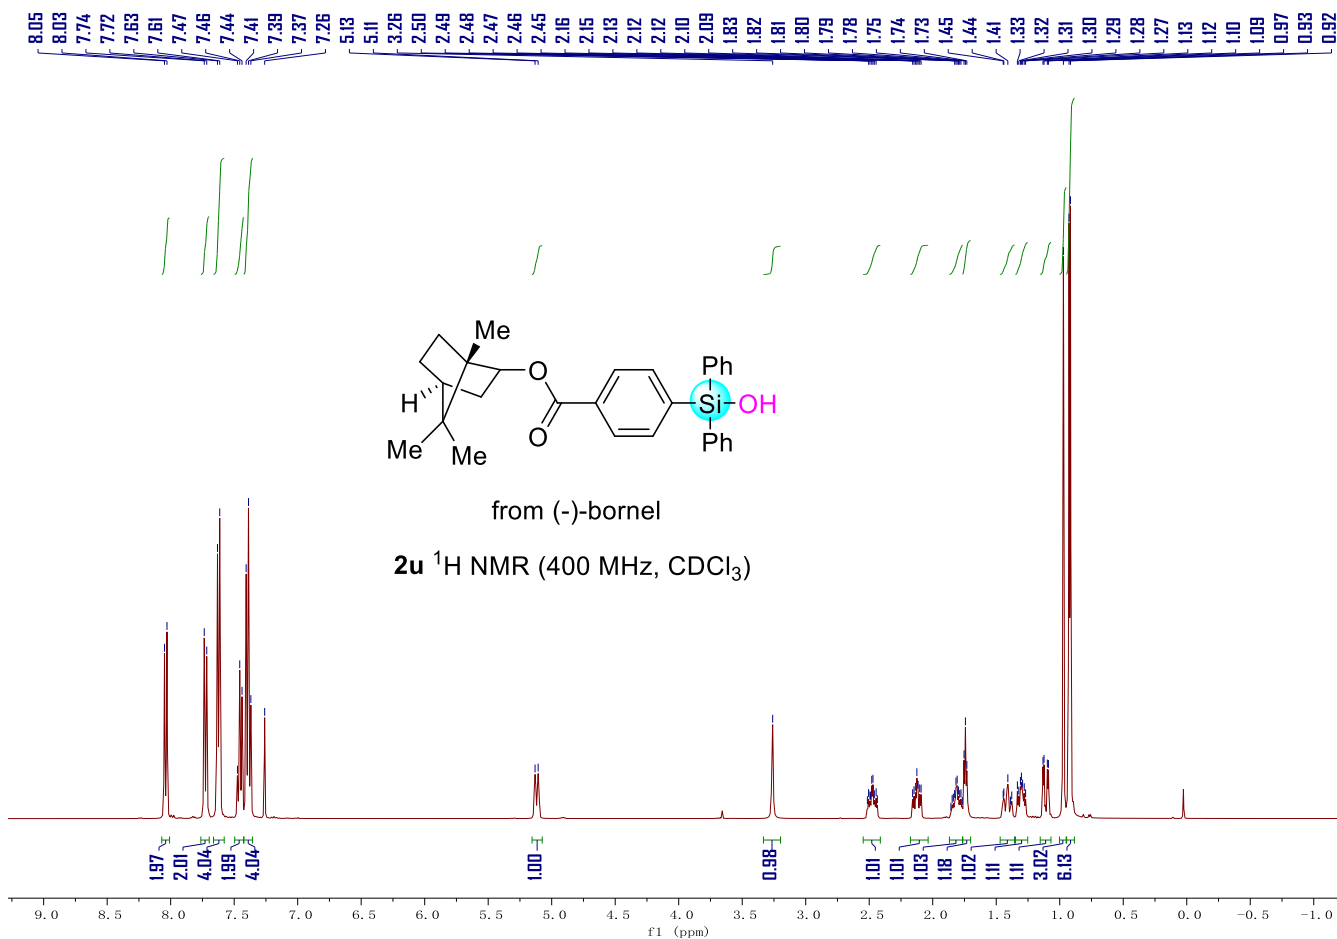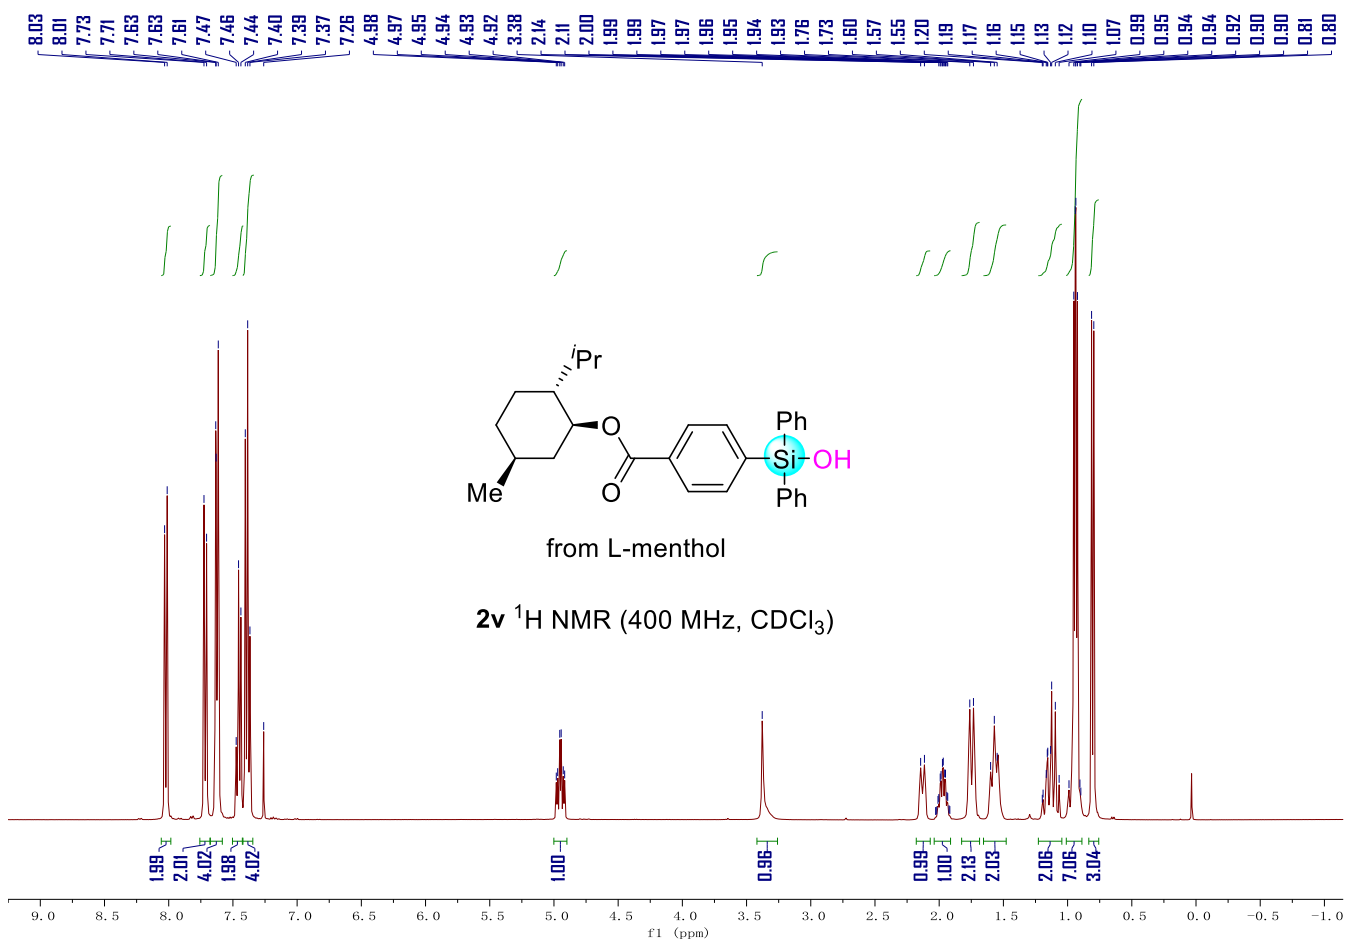

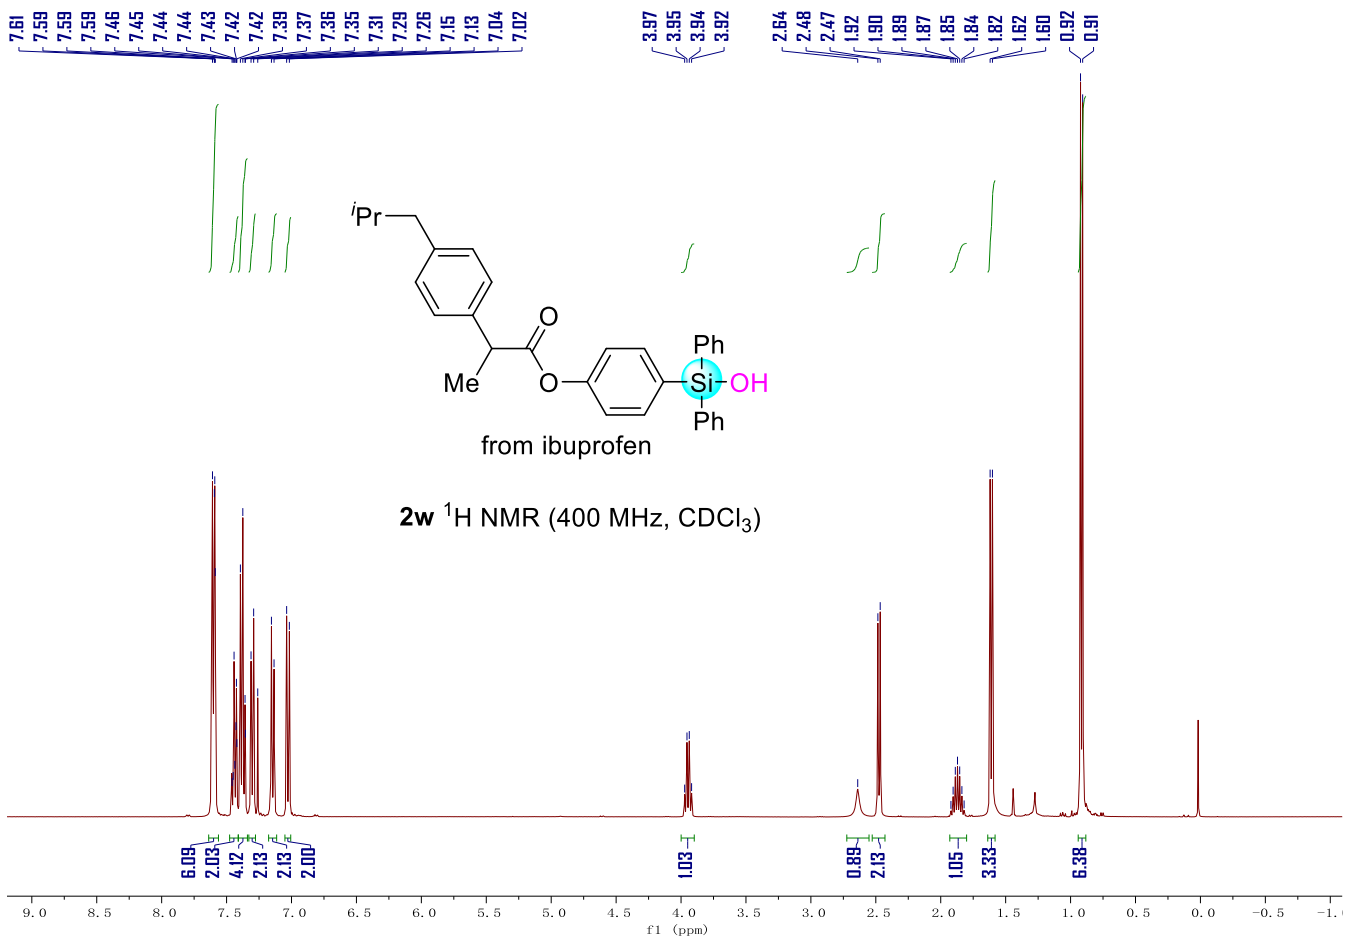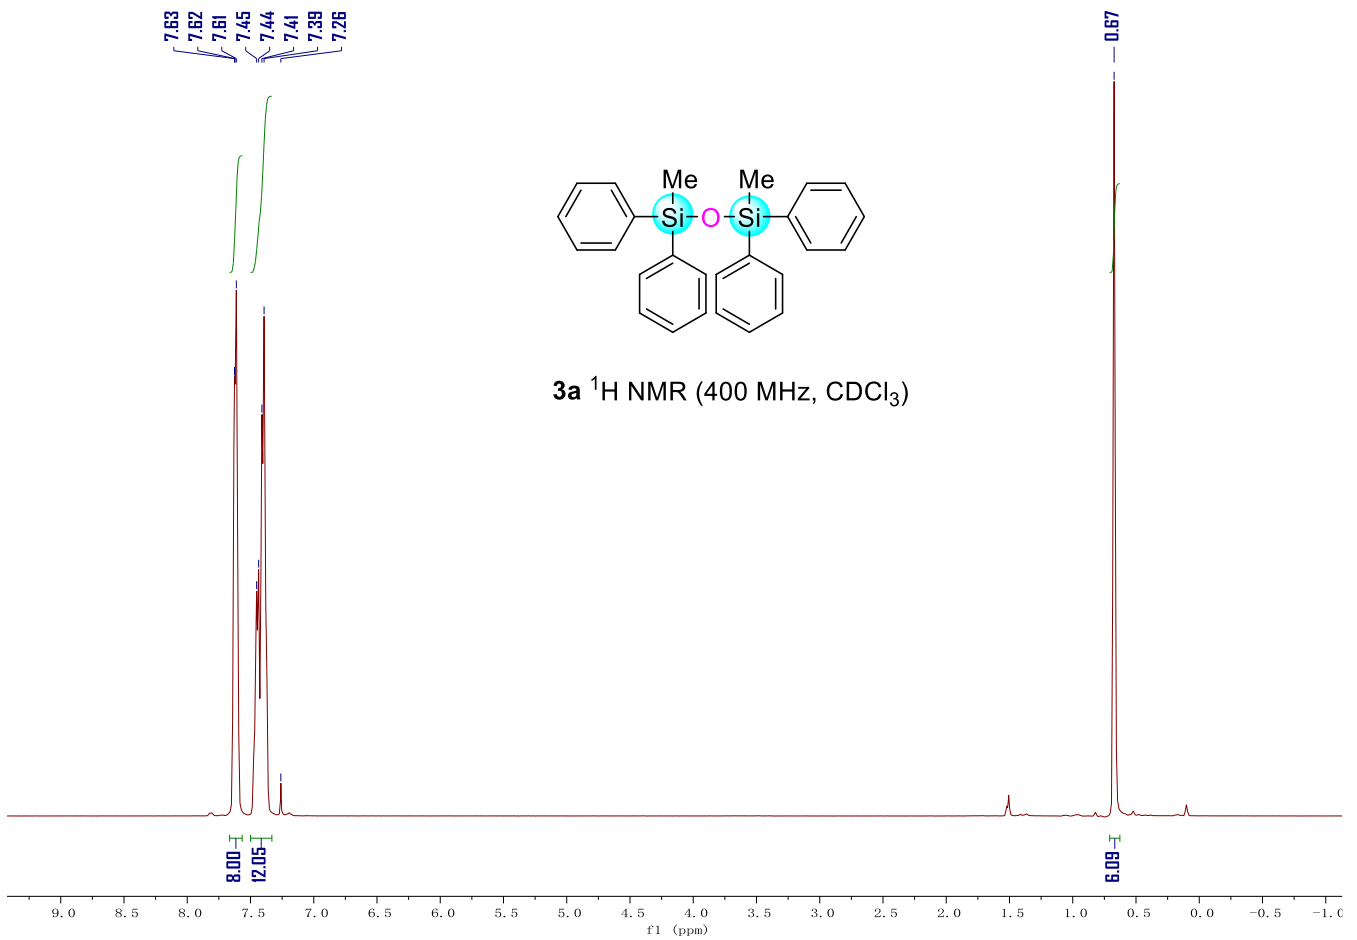

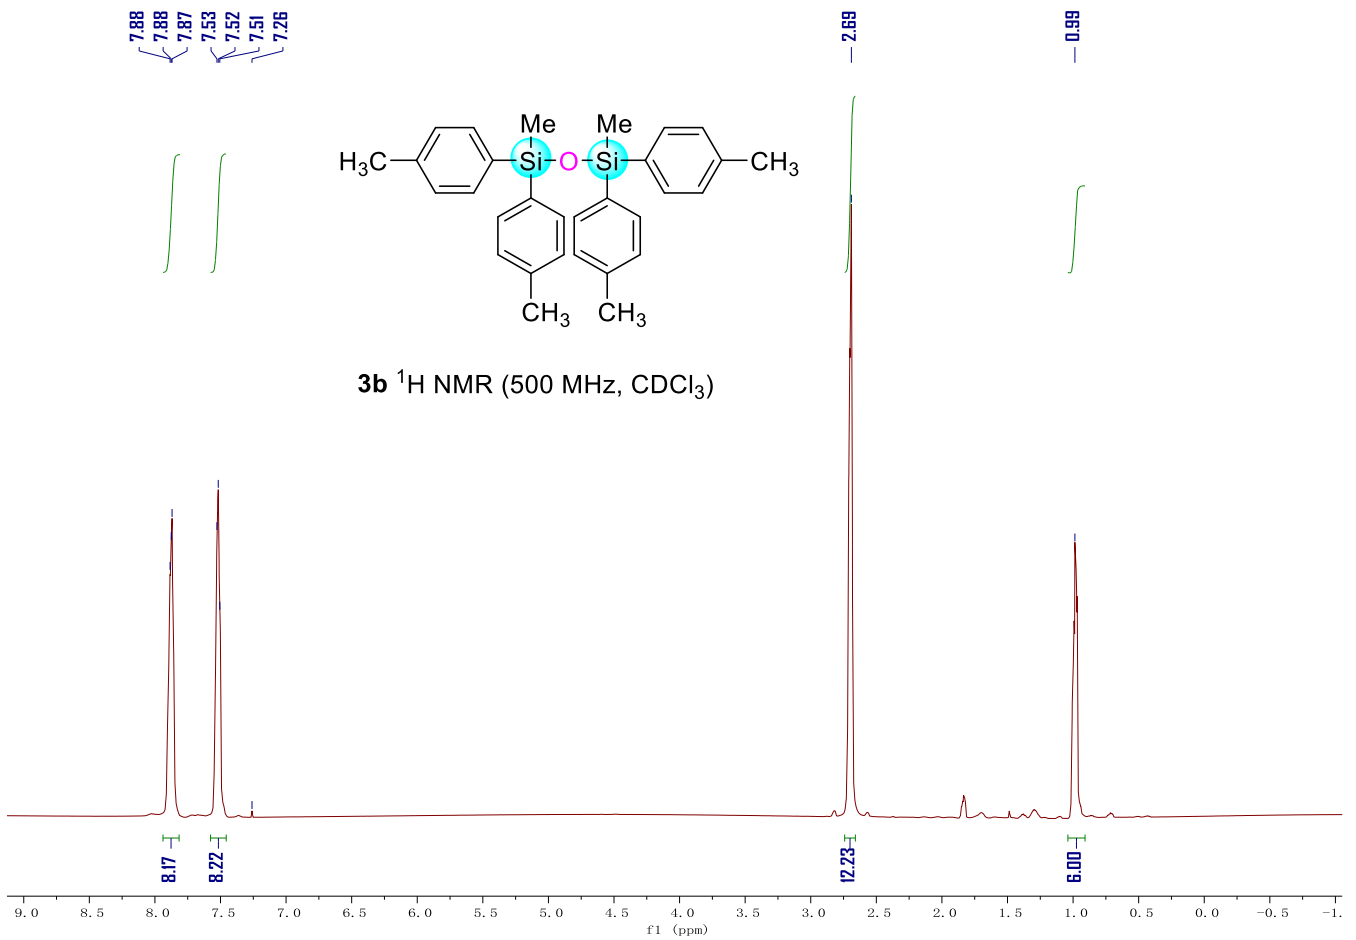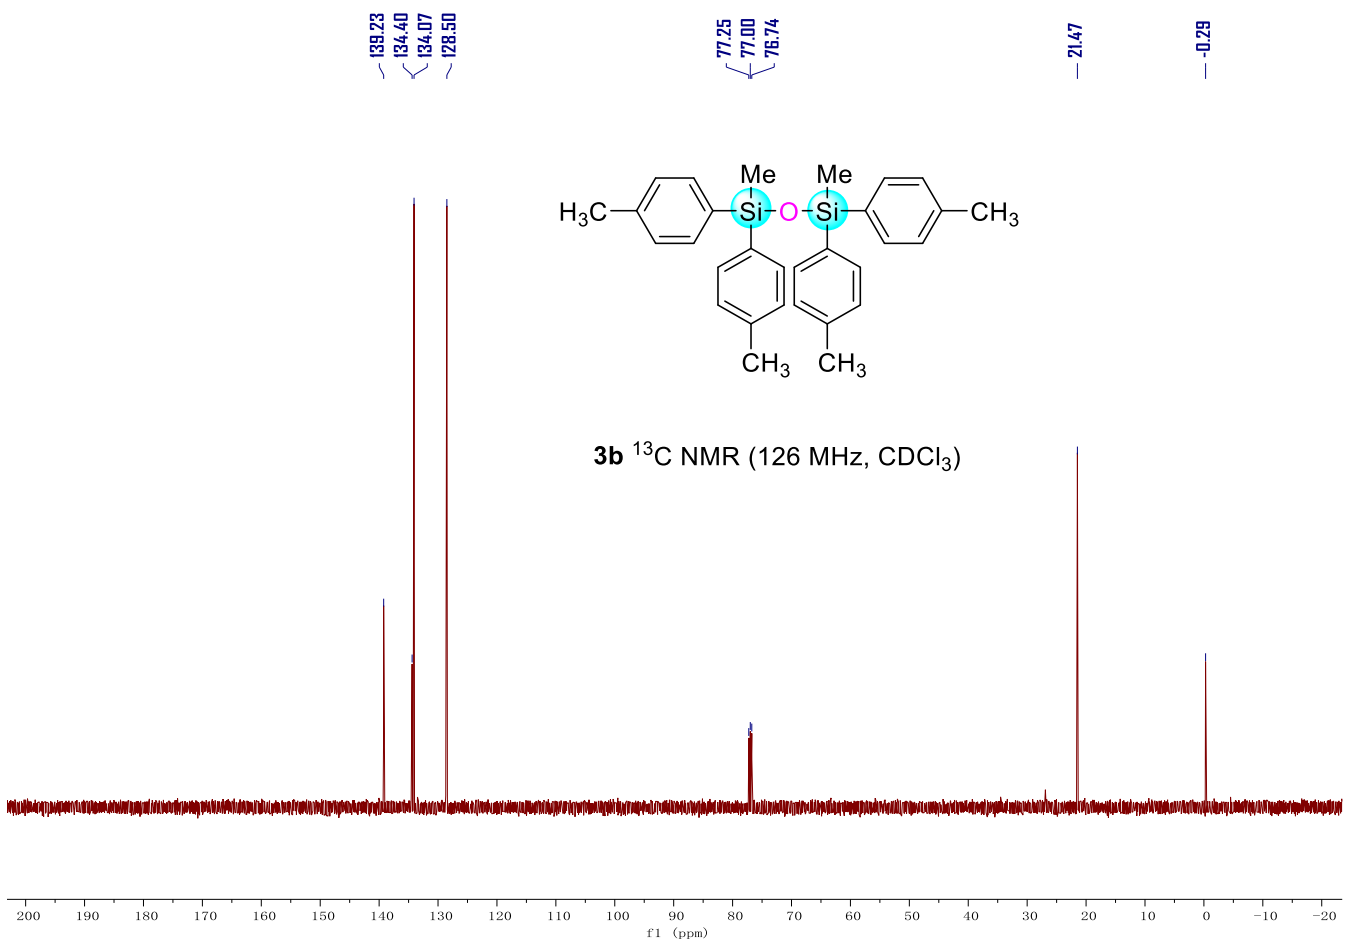

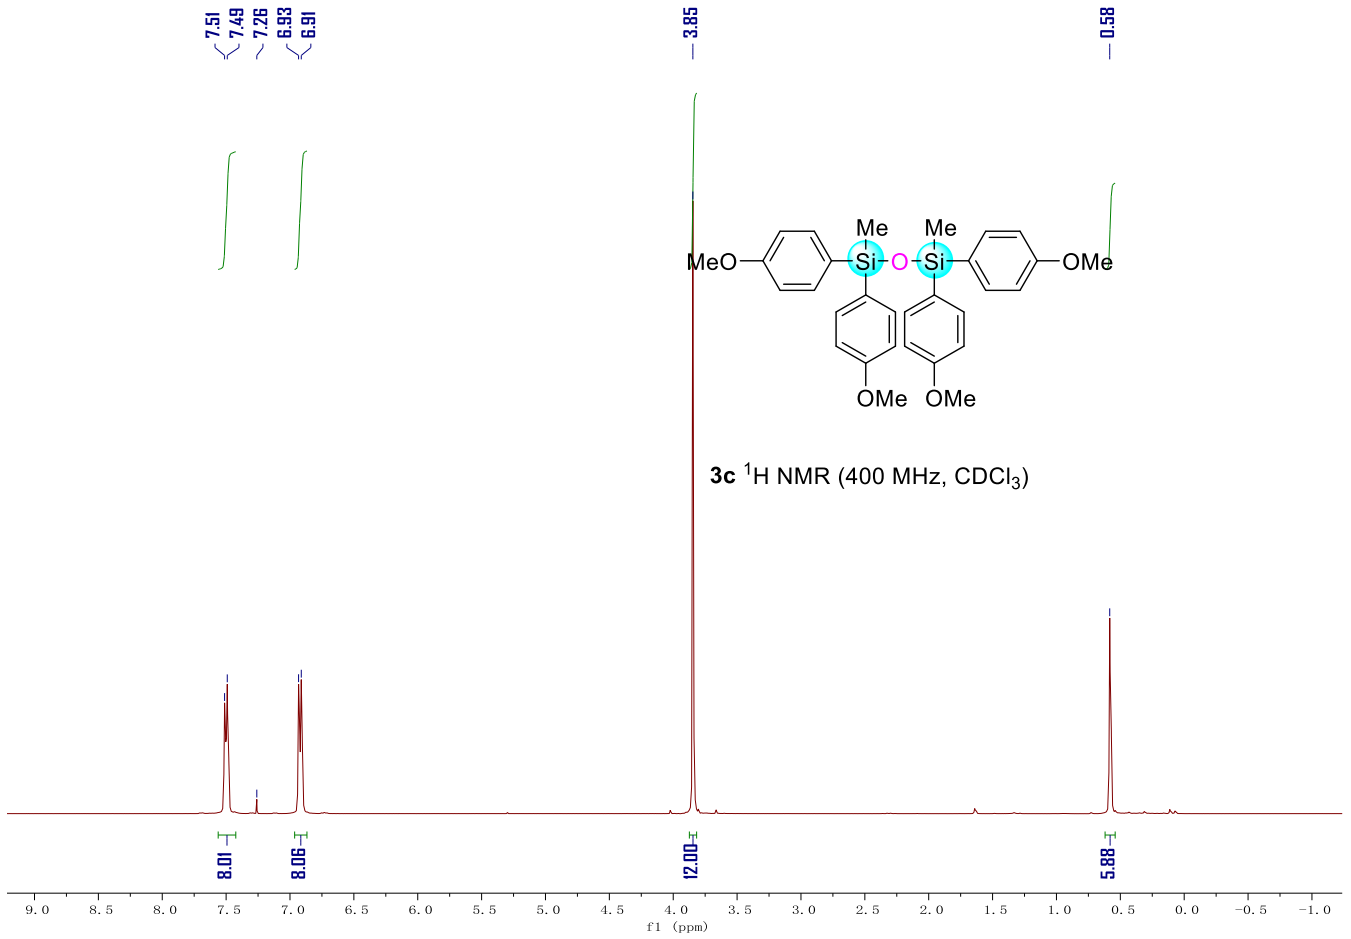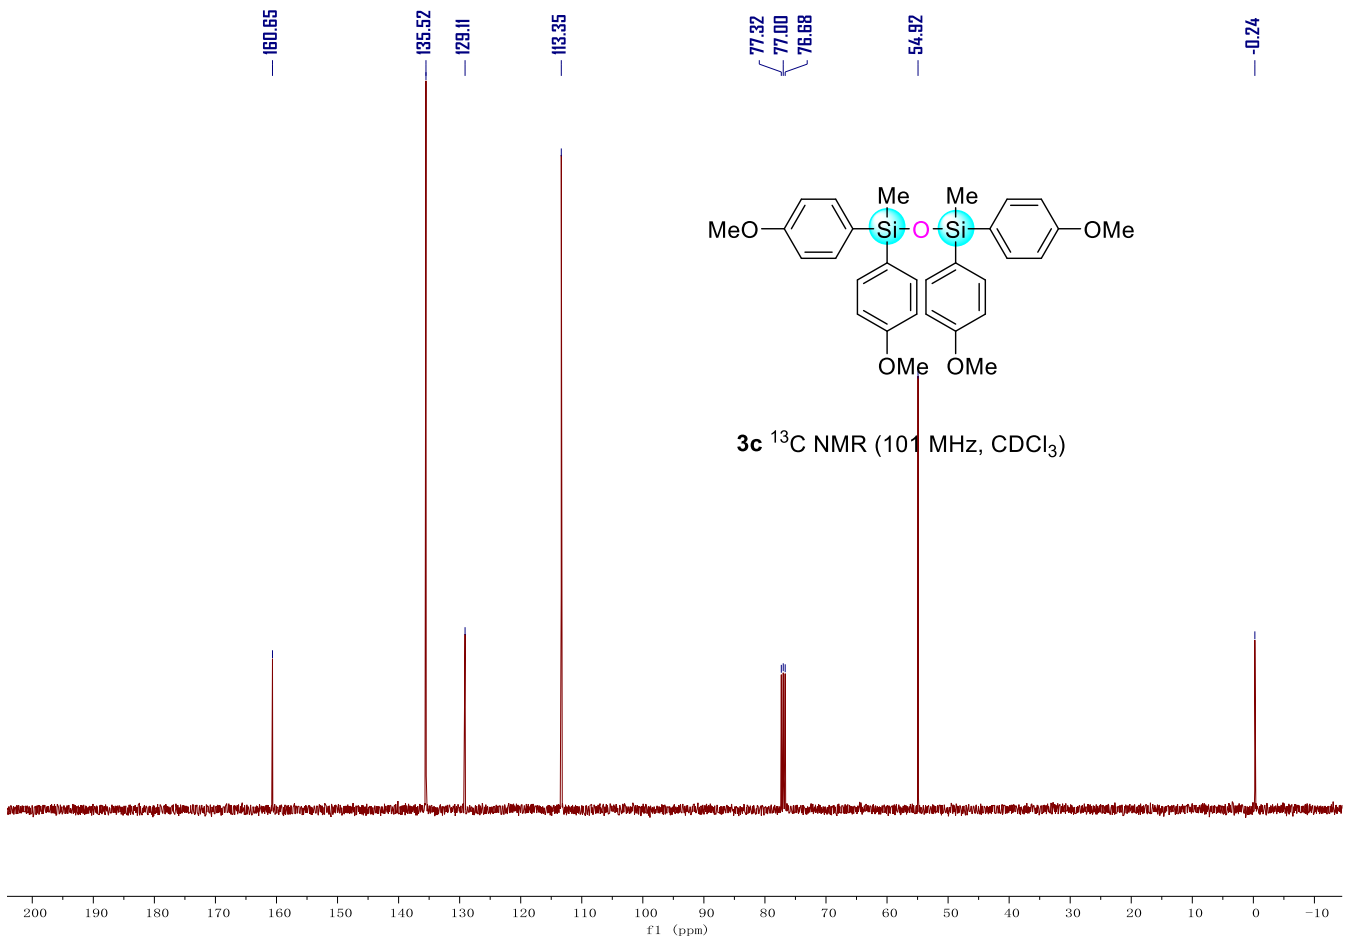

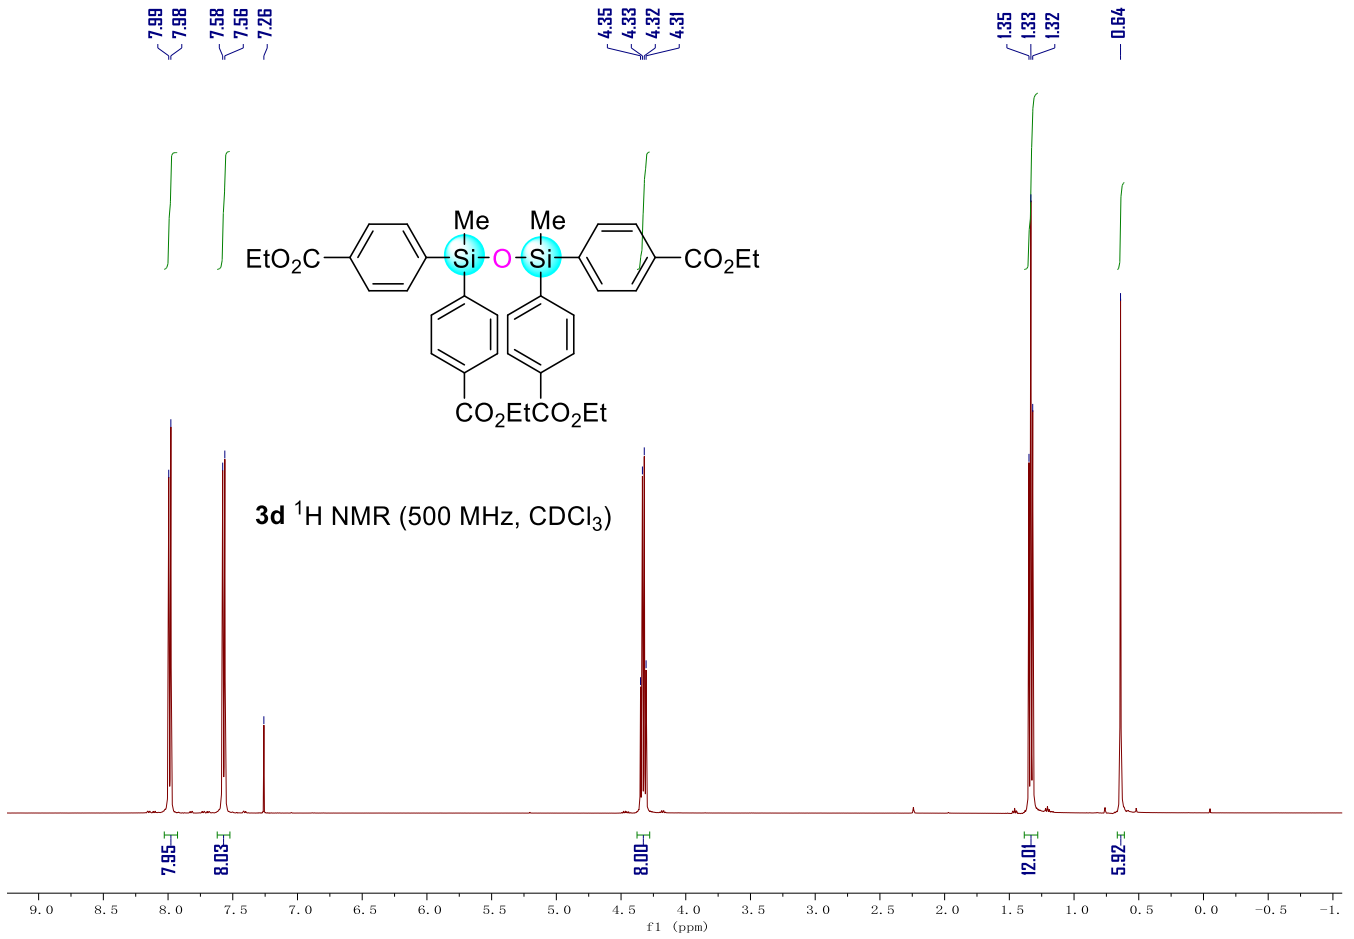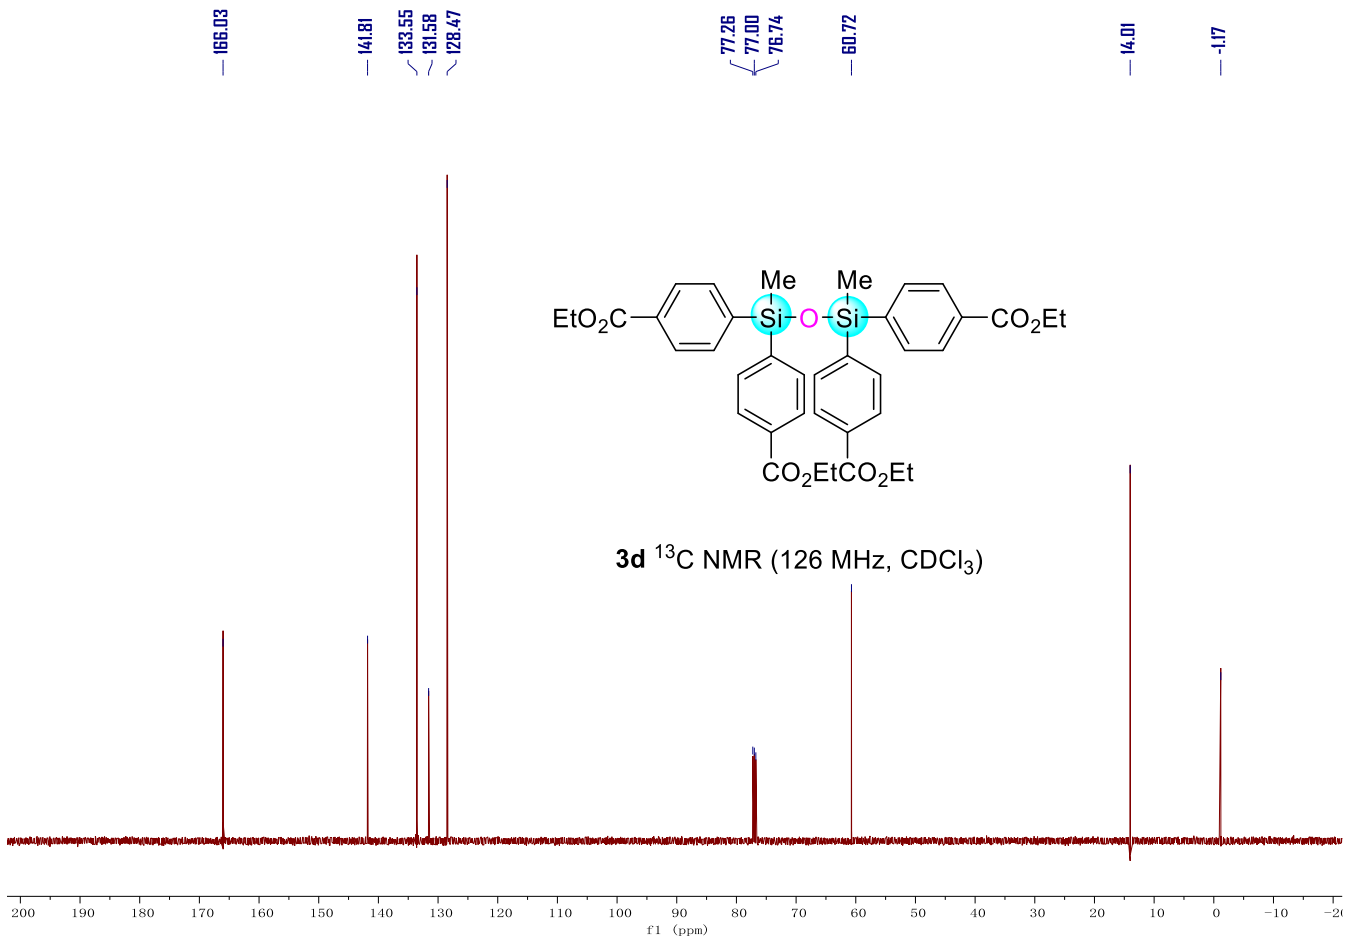

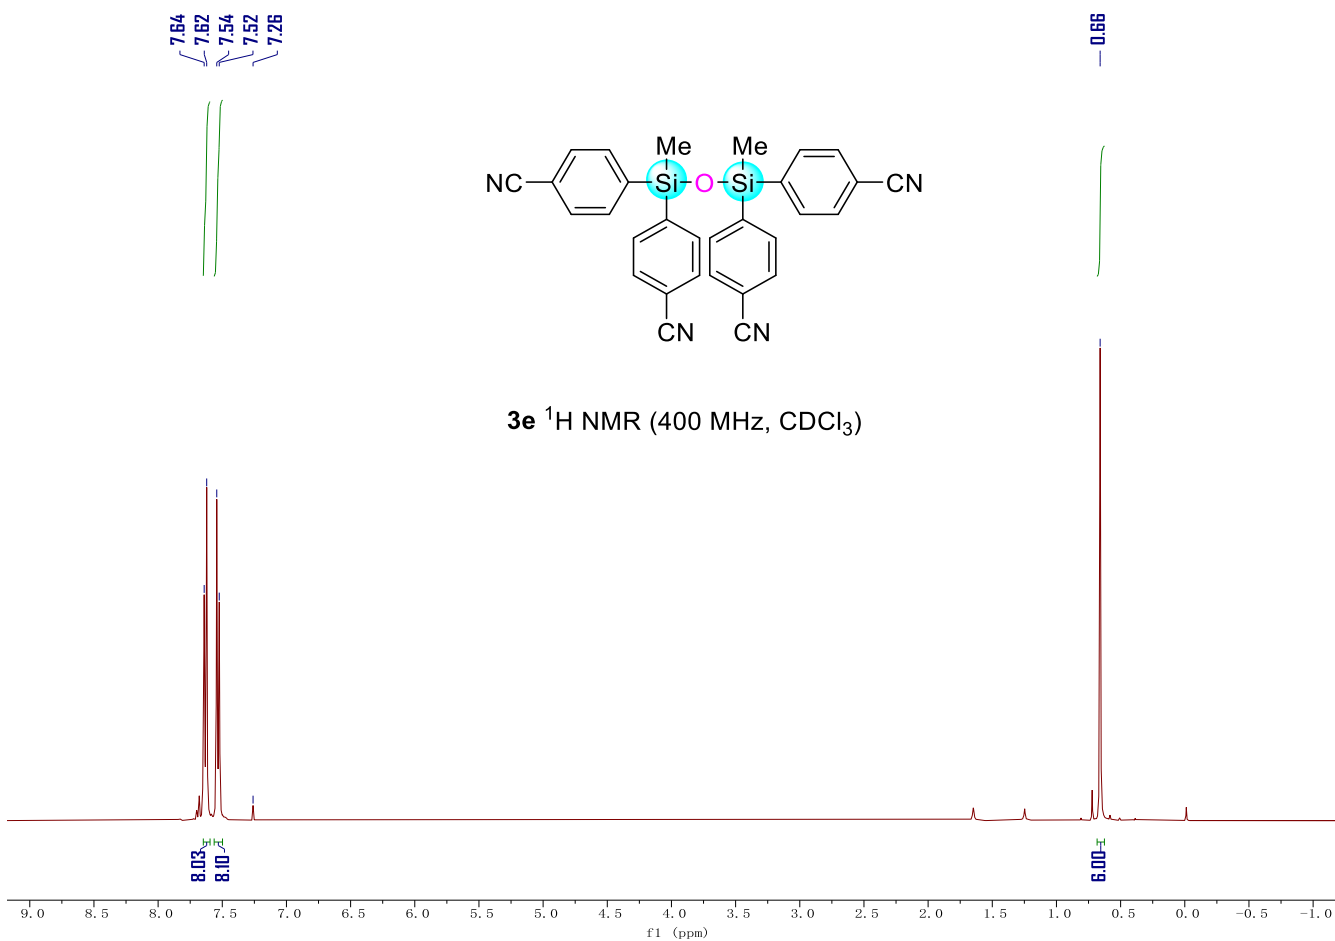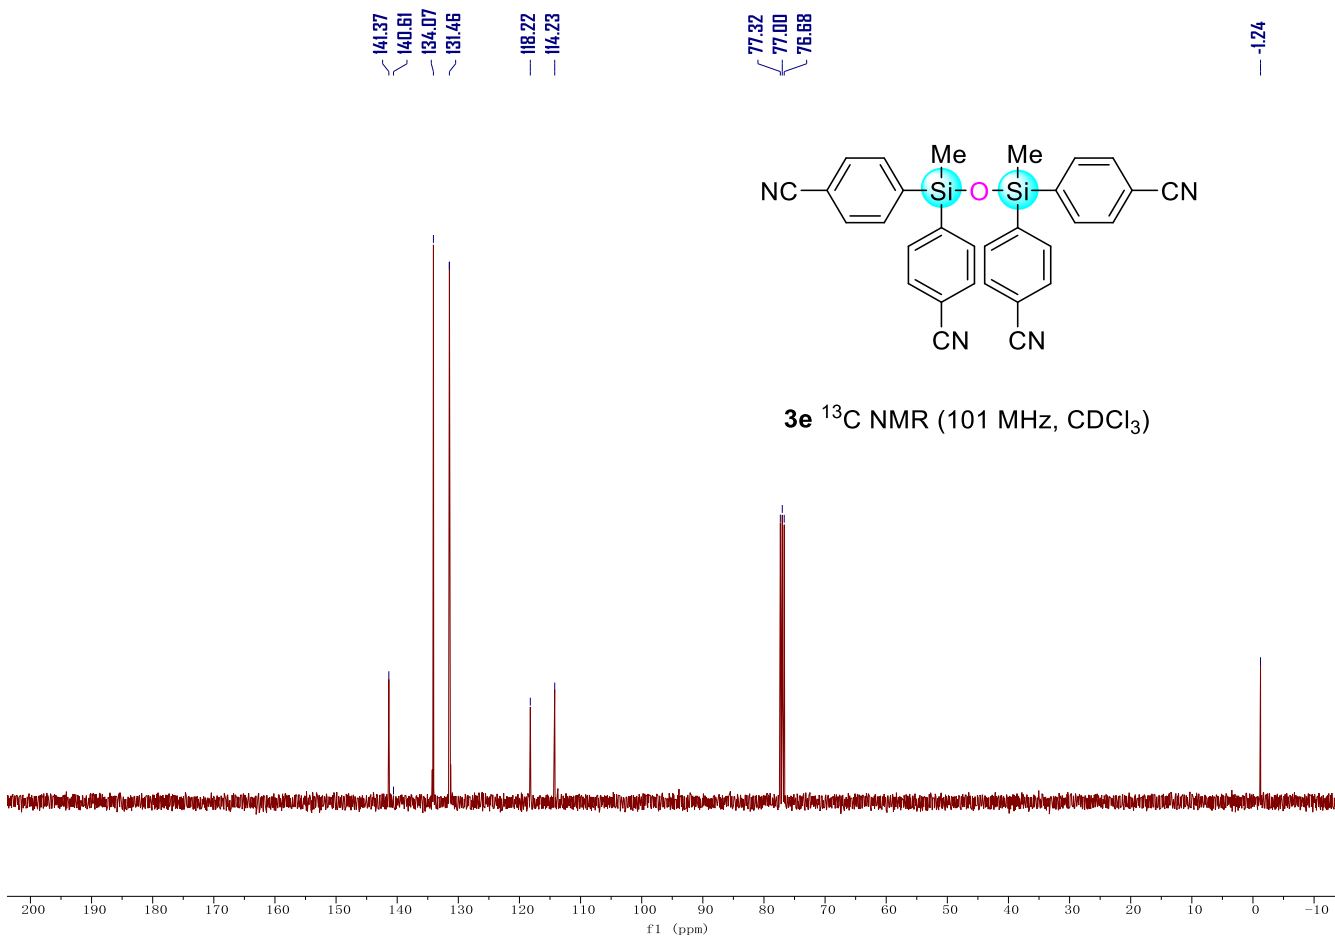



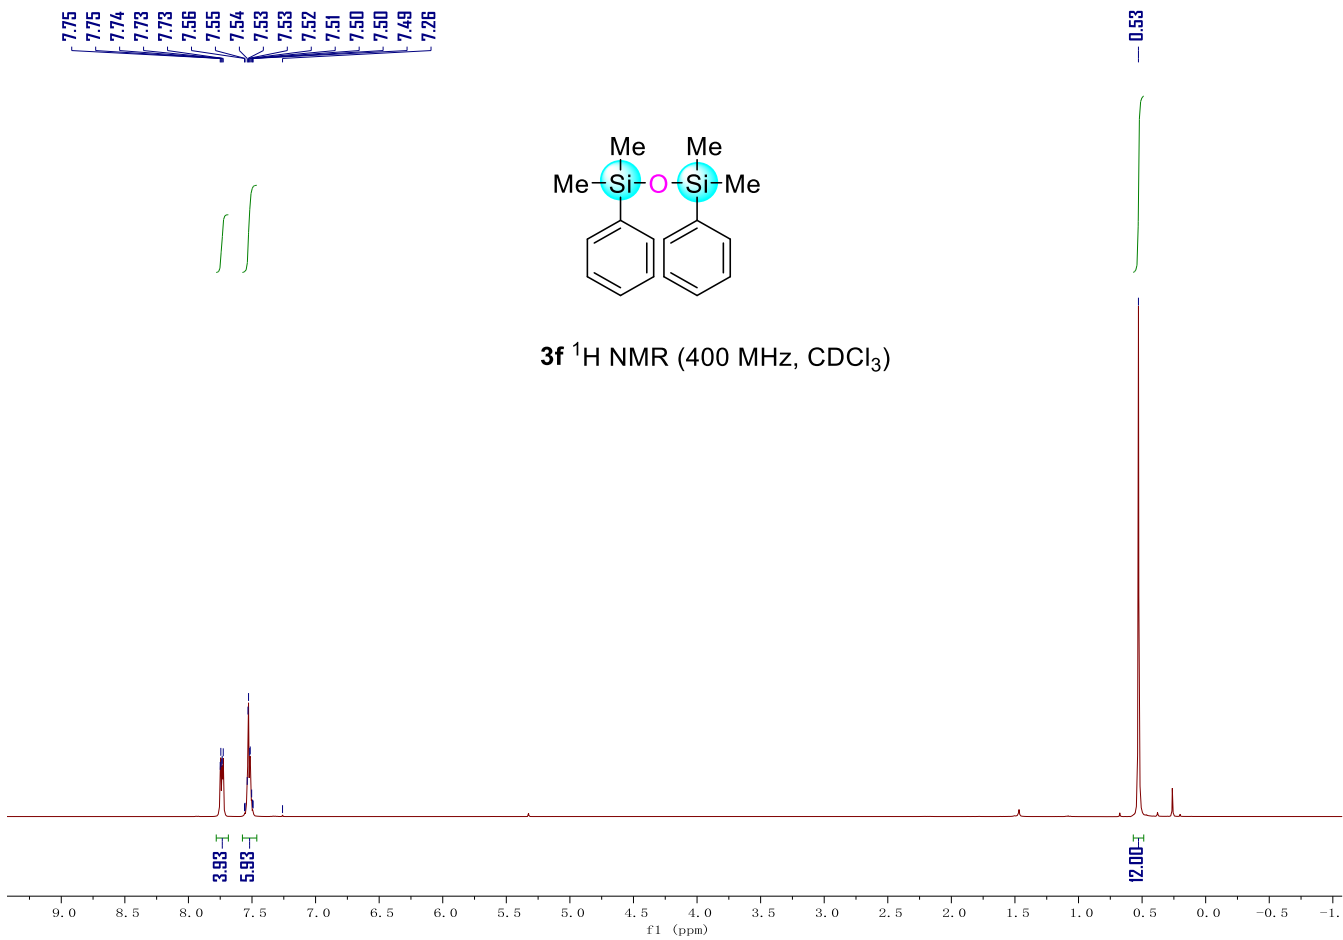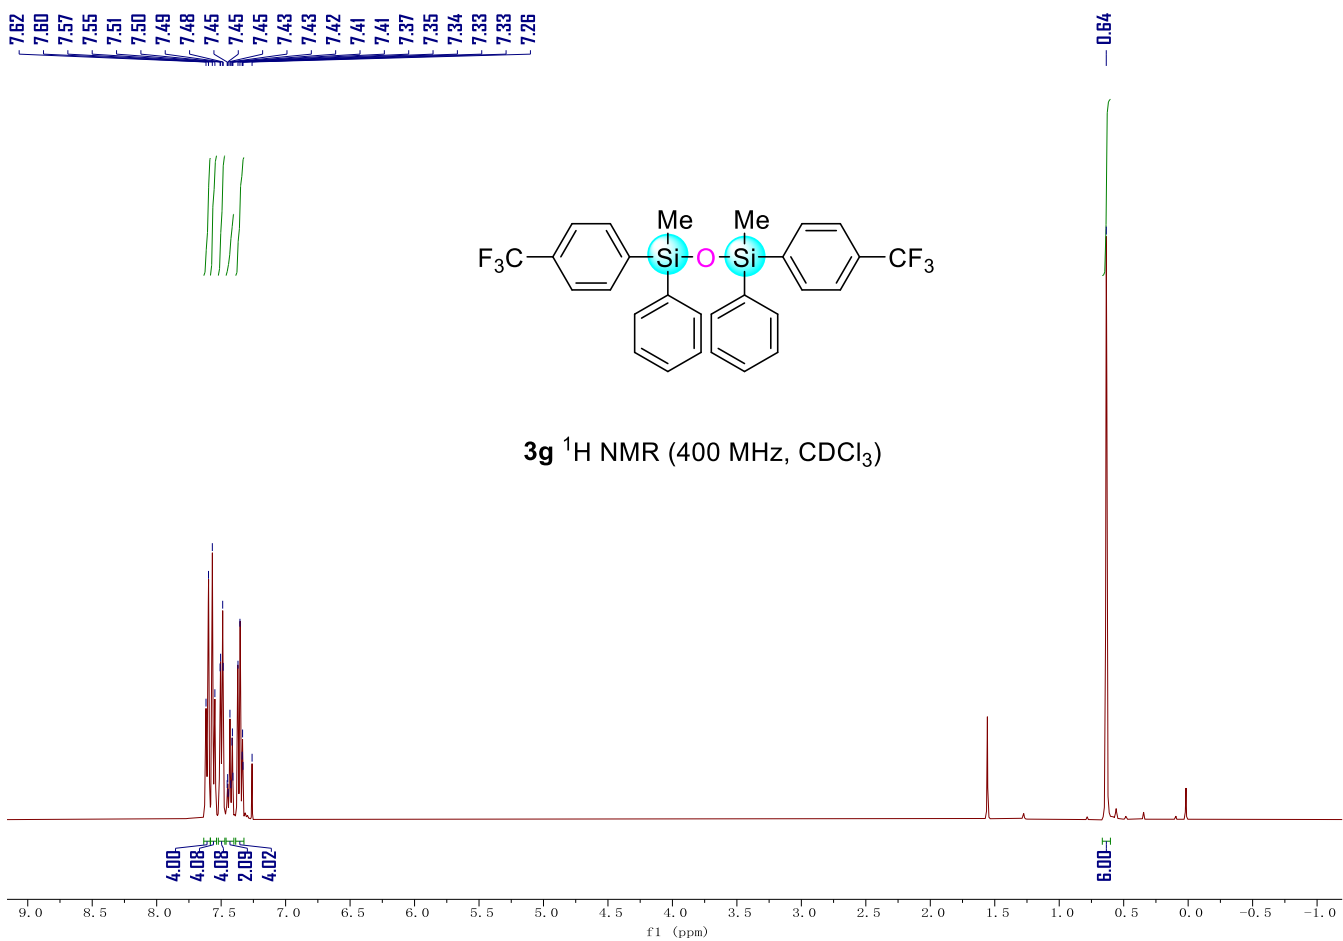

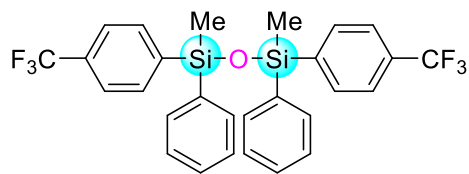

**3g** <sup>19</sup>F NMR (376 MHz, CDCl<sub>3</sub>)

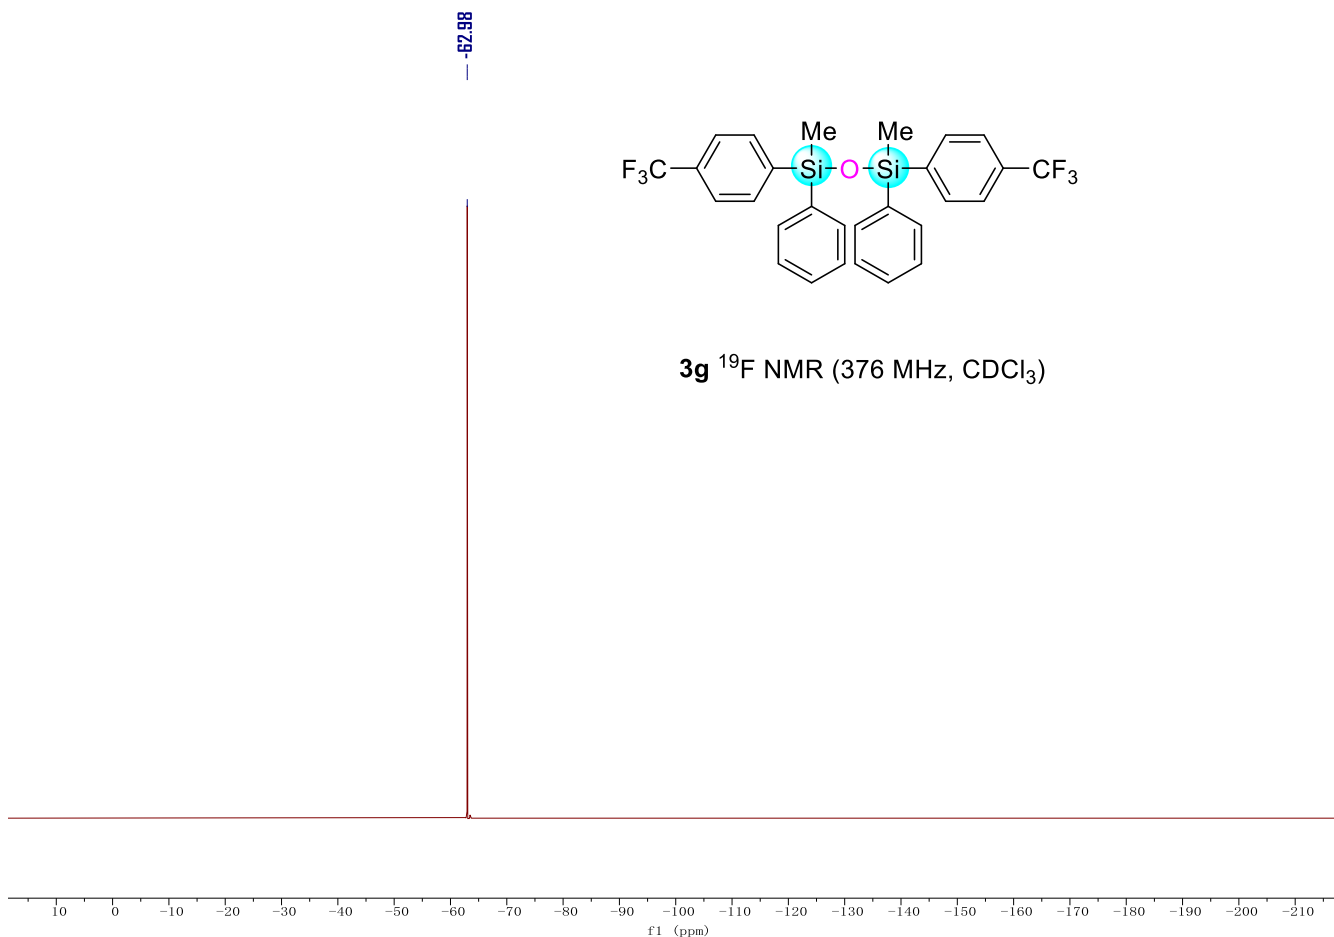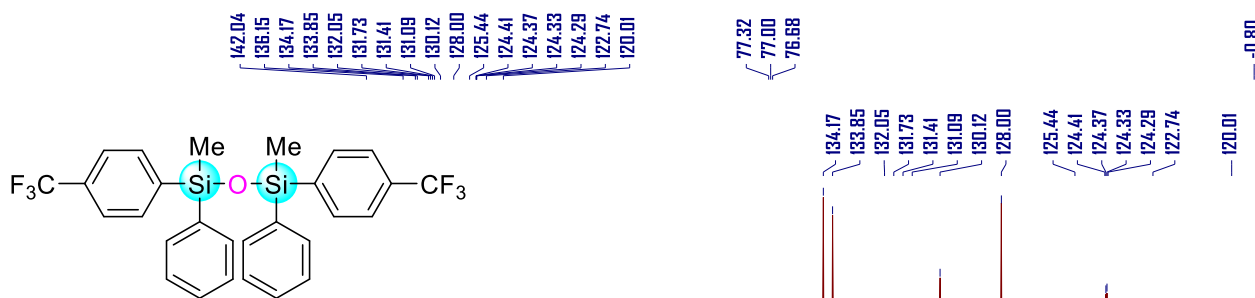

**3g** <sup>13</sup>C NMR (101 MHz, CDCl<sub>3</sub>)

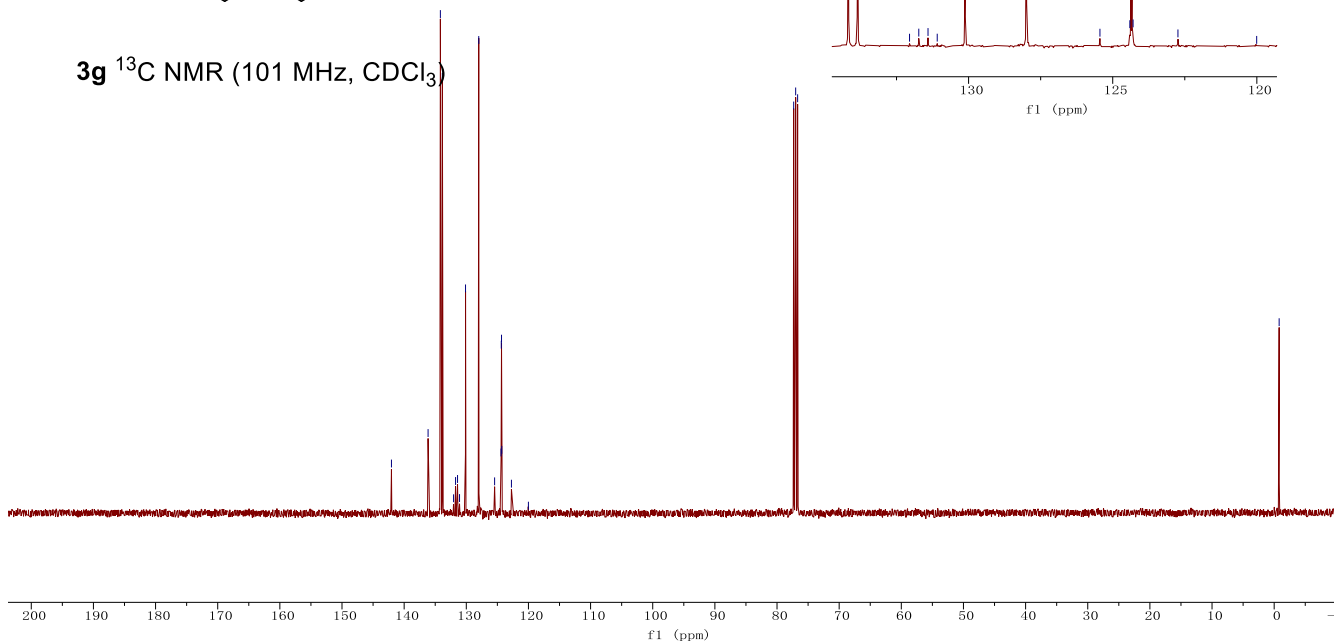

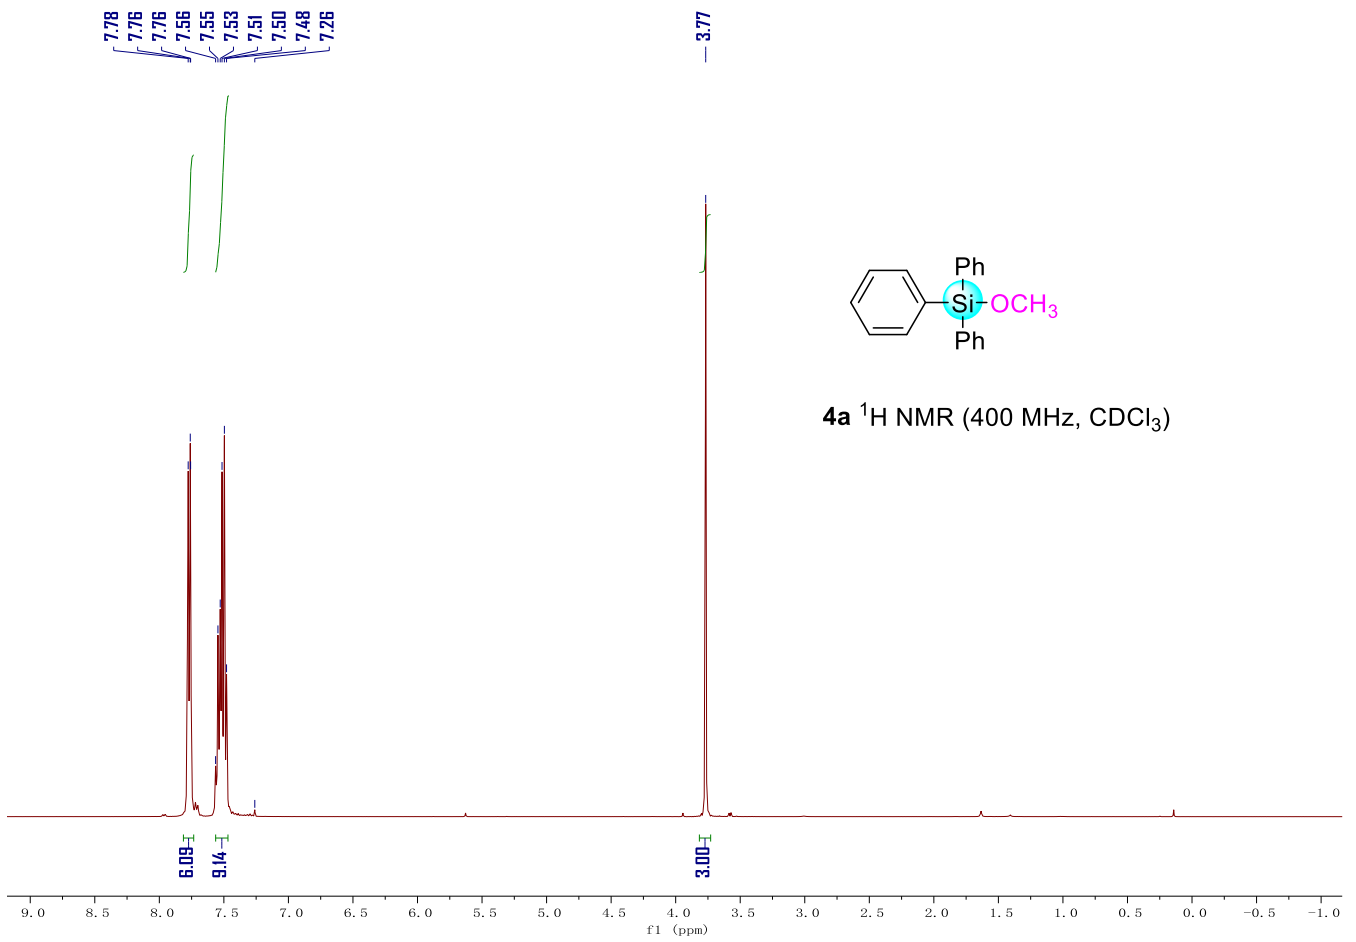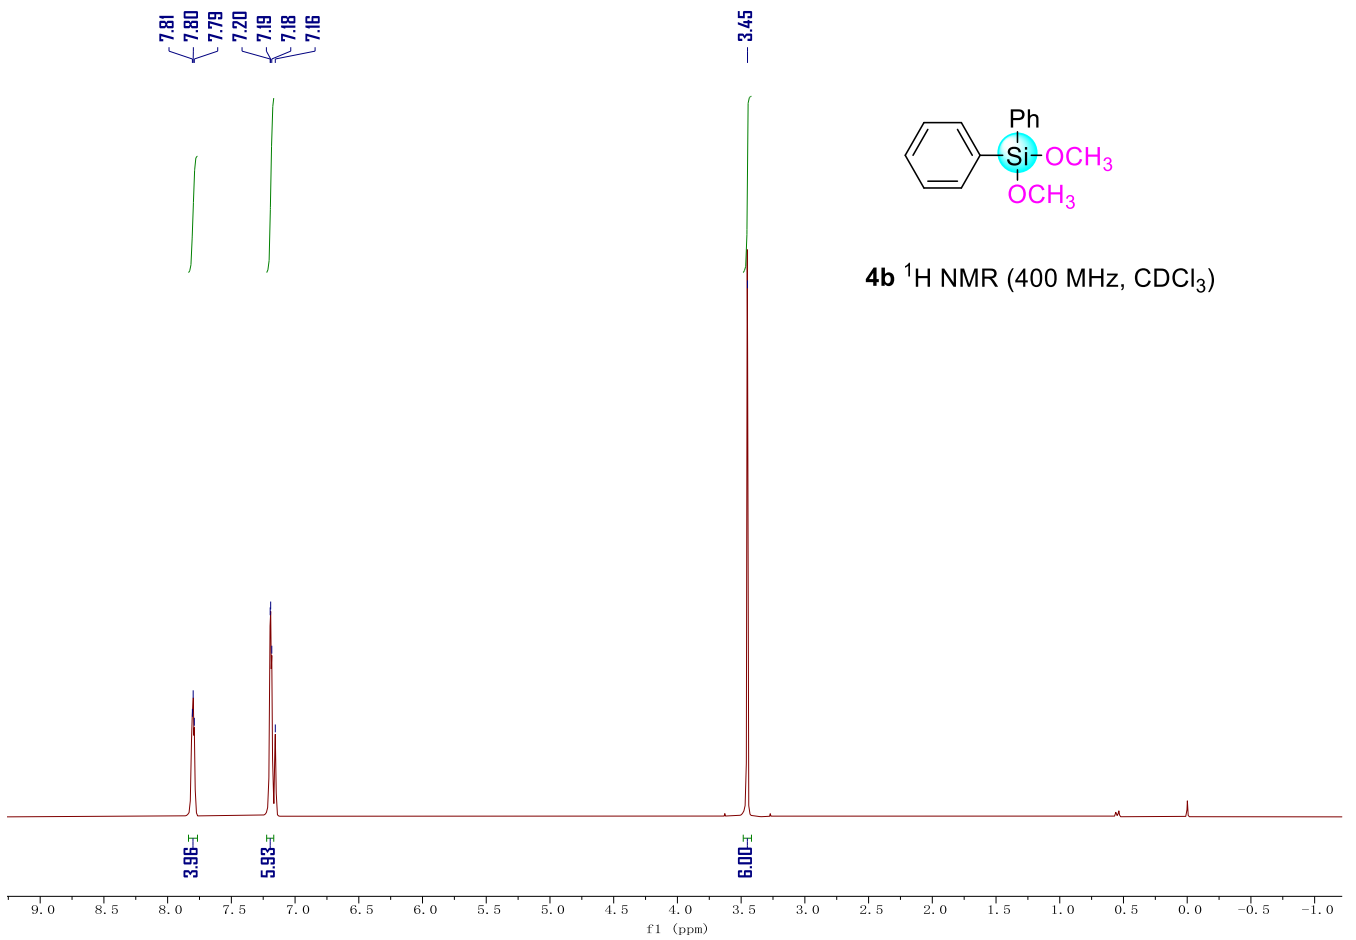

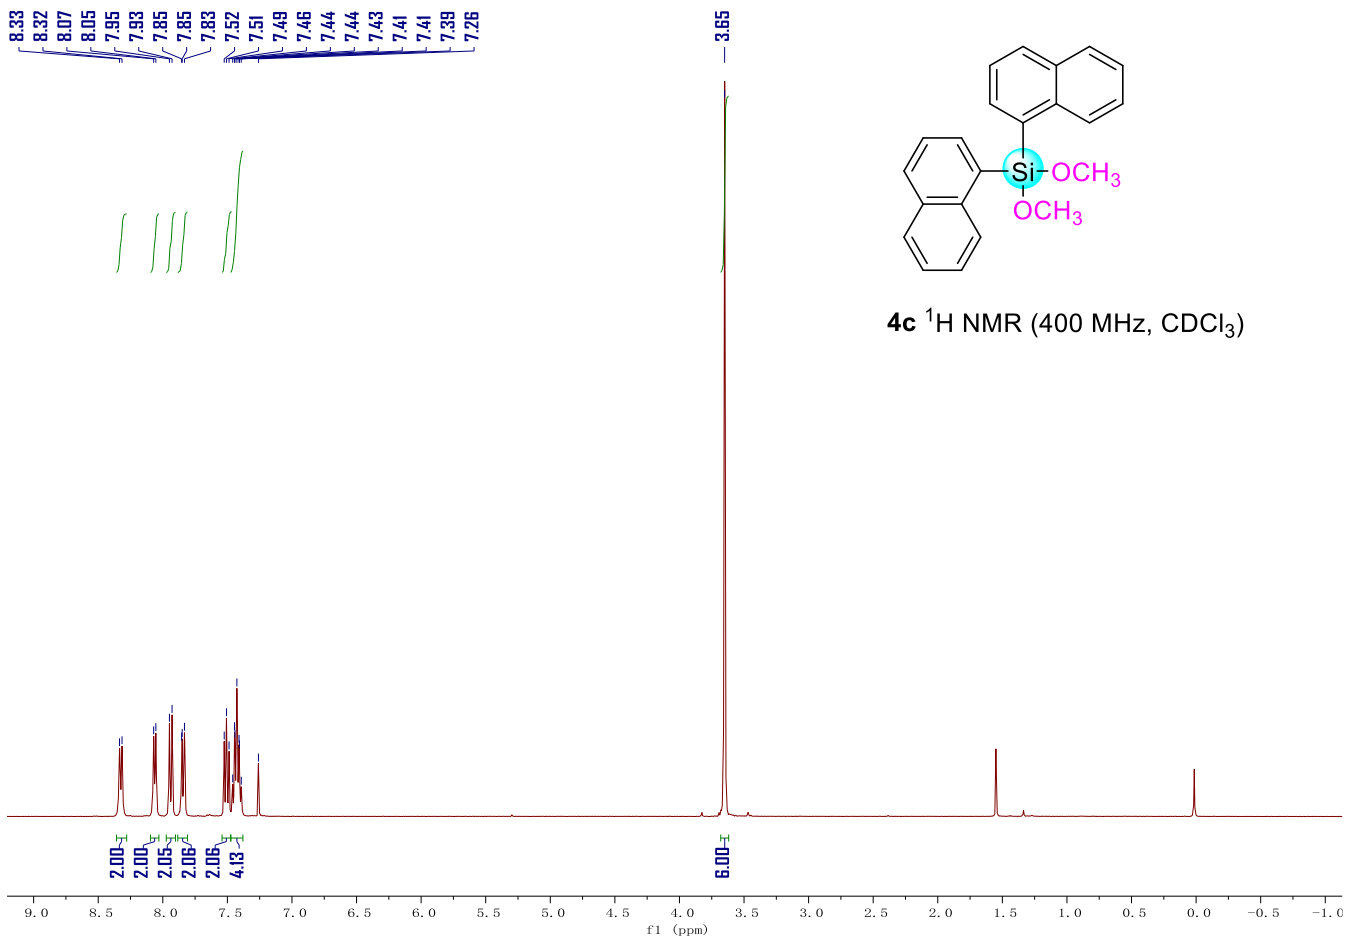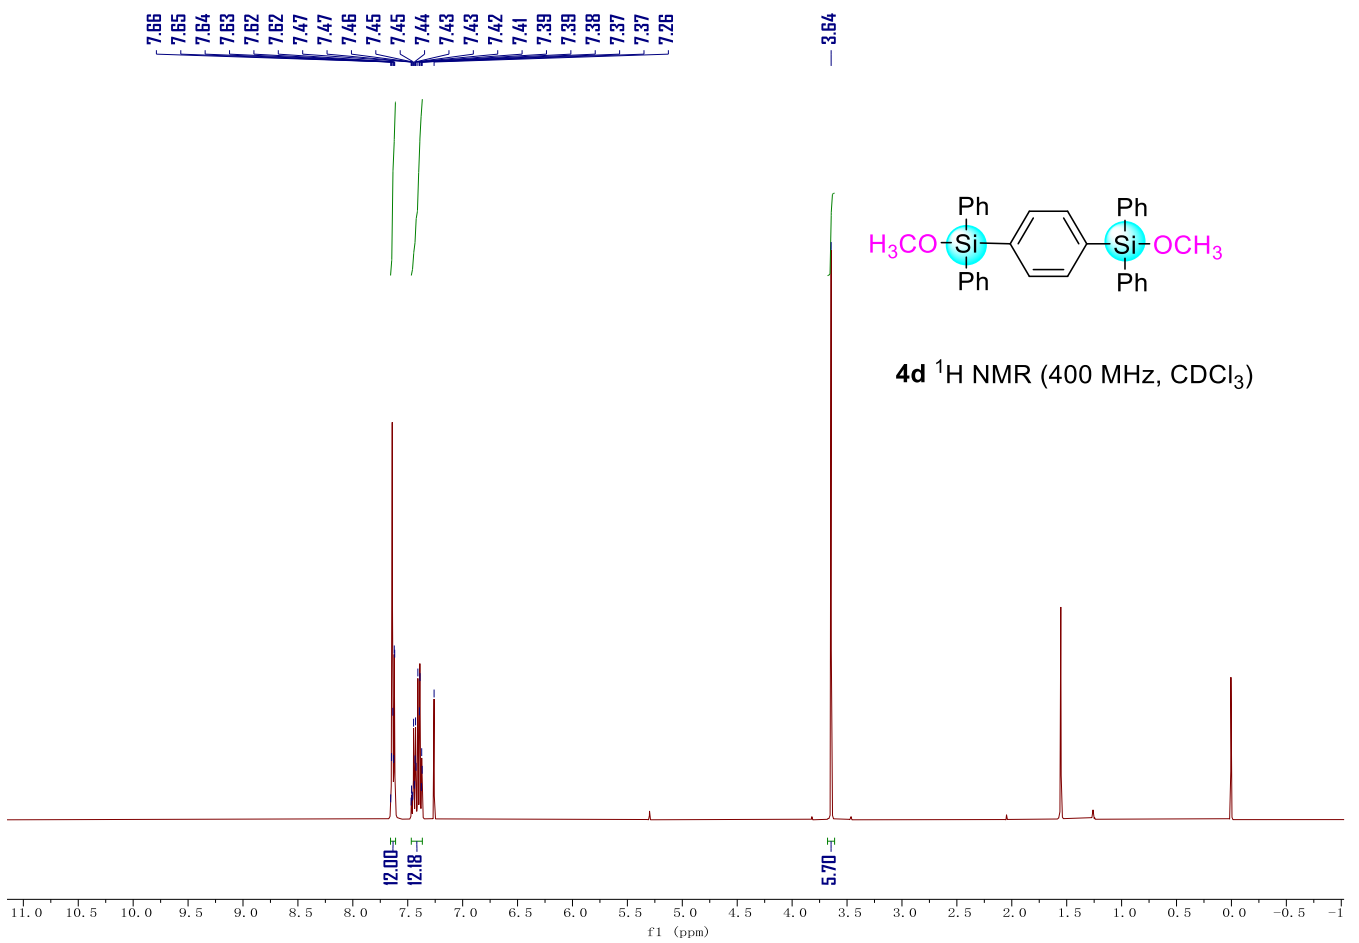

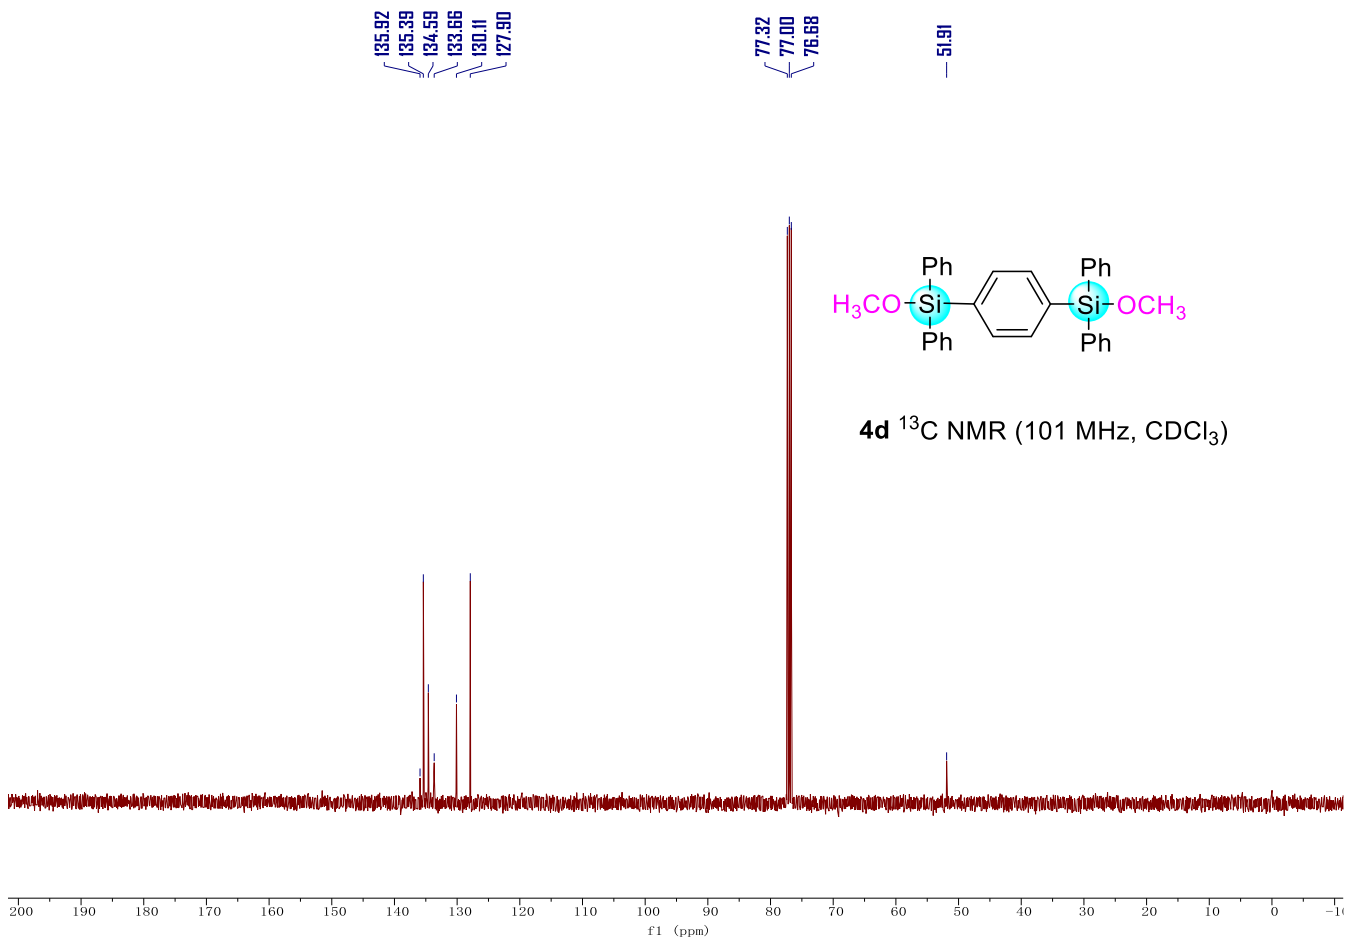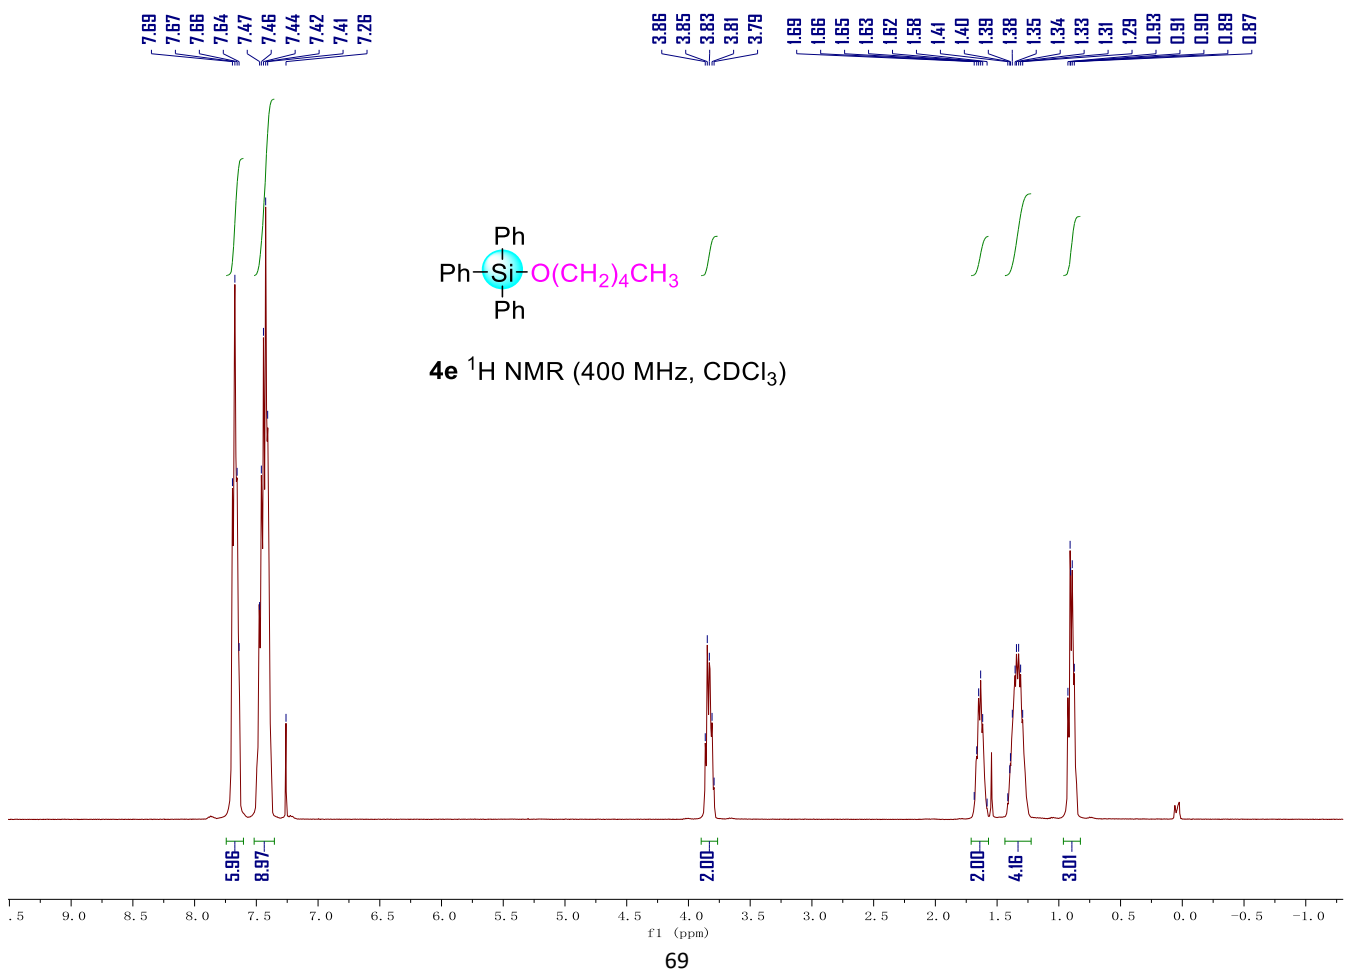



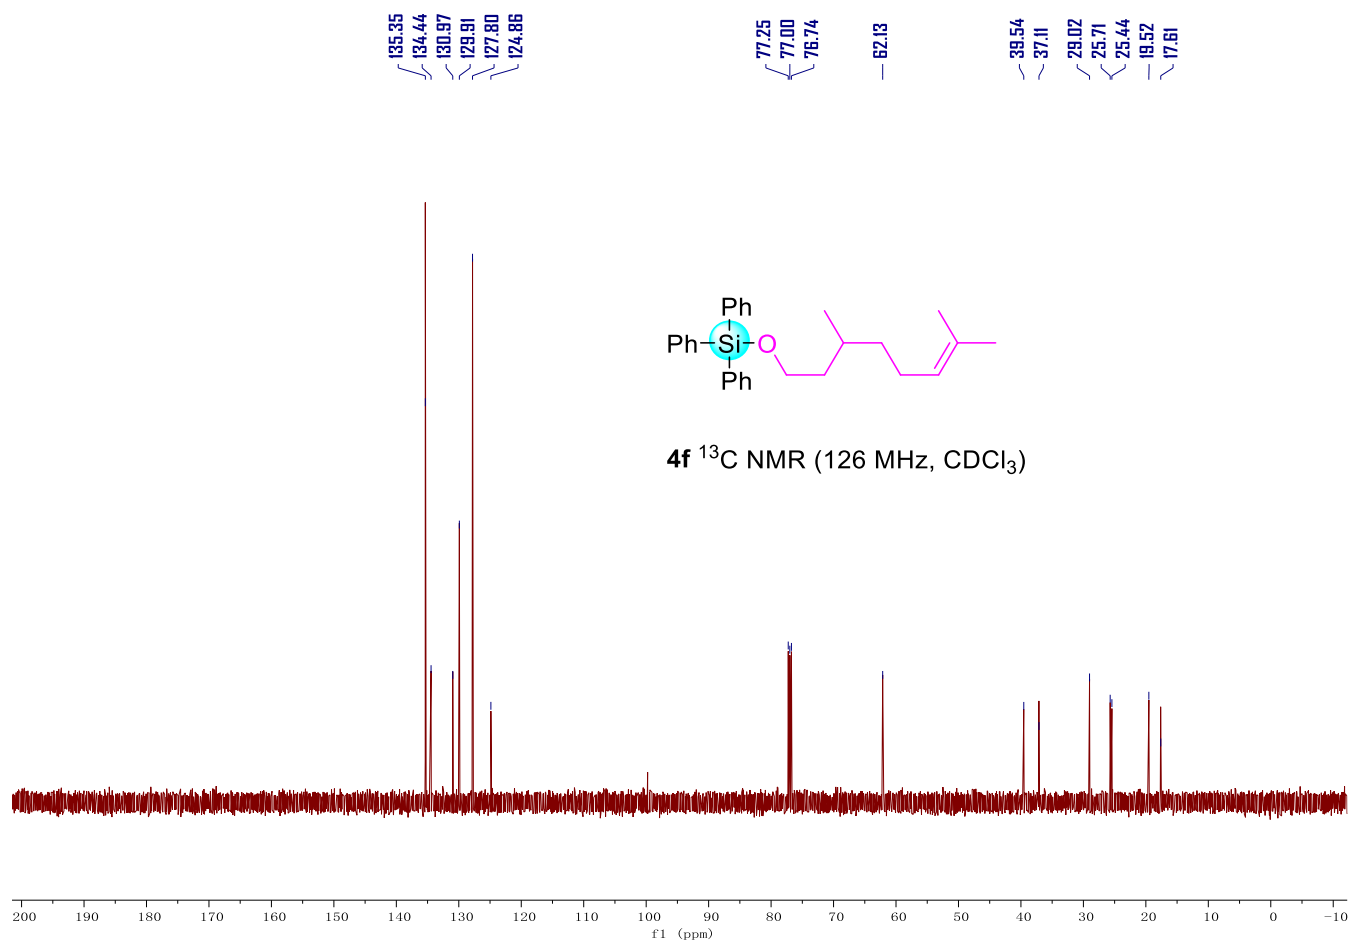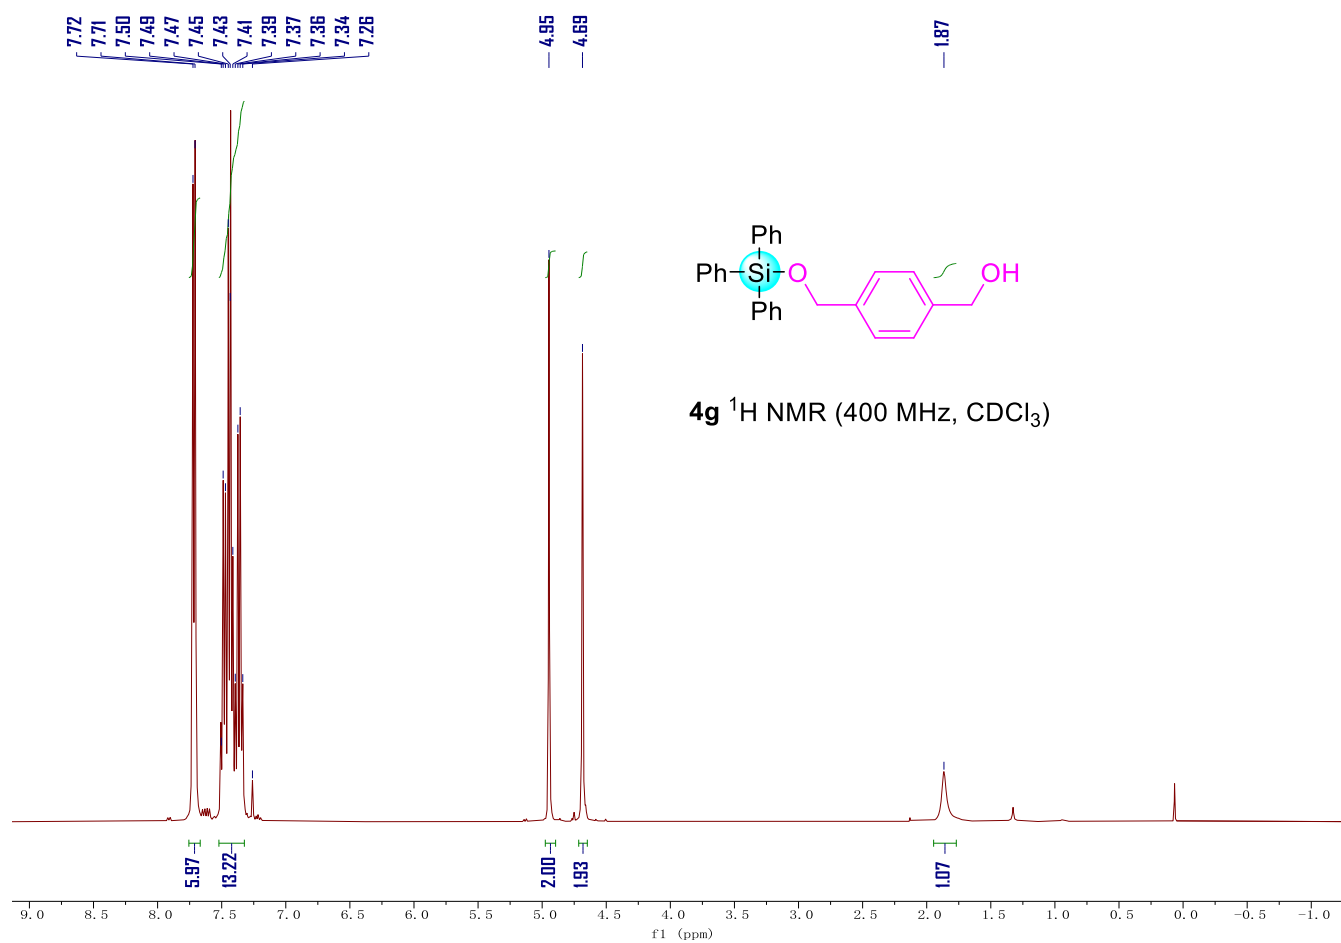

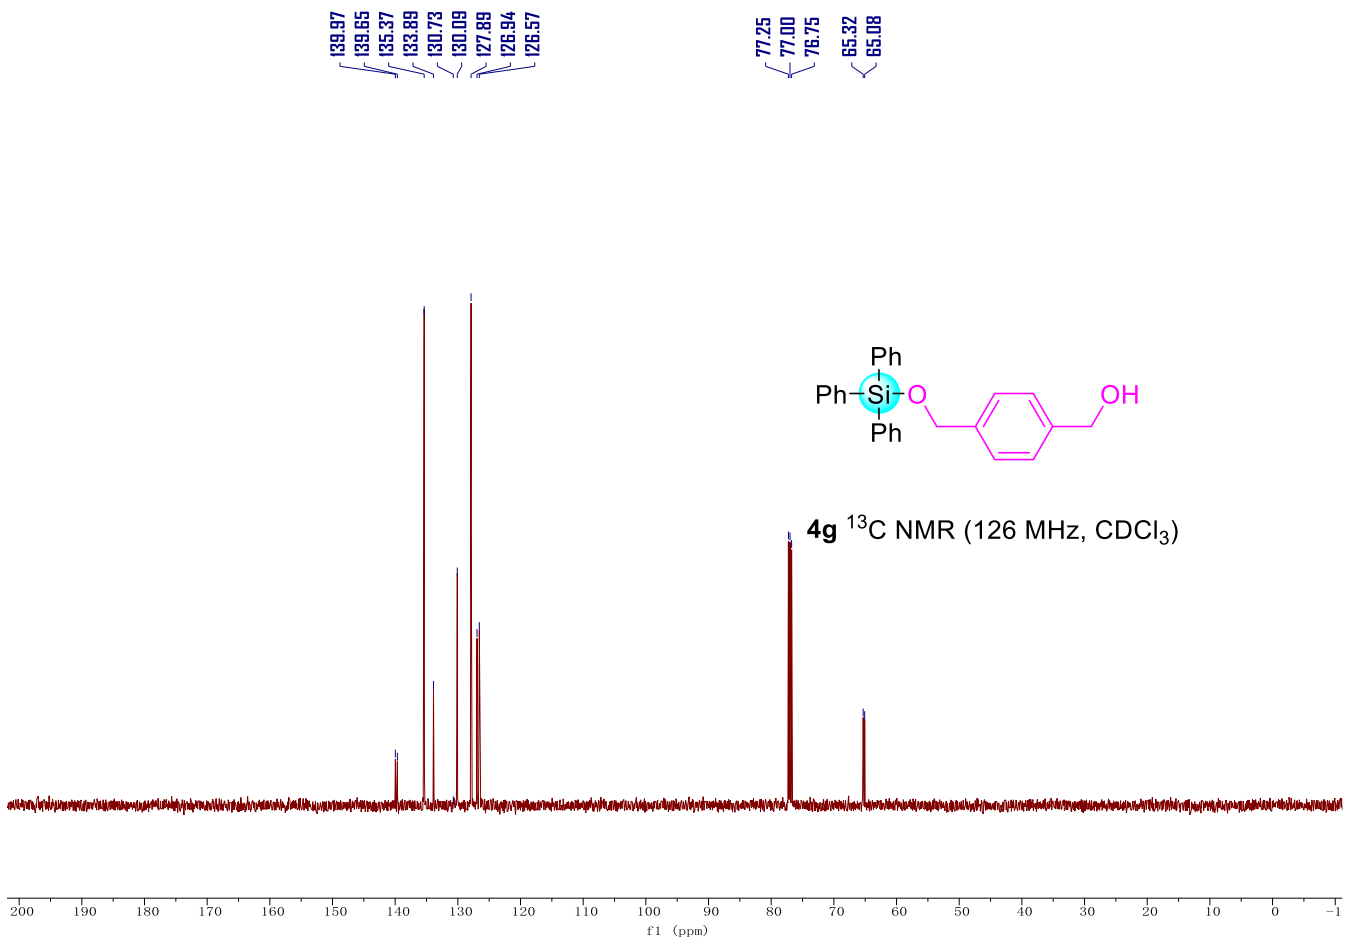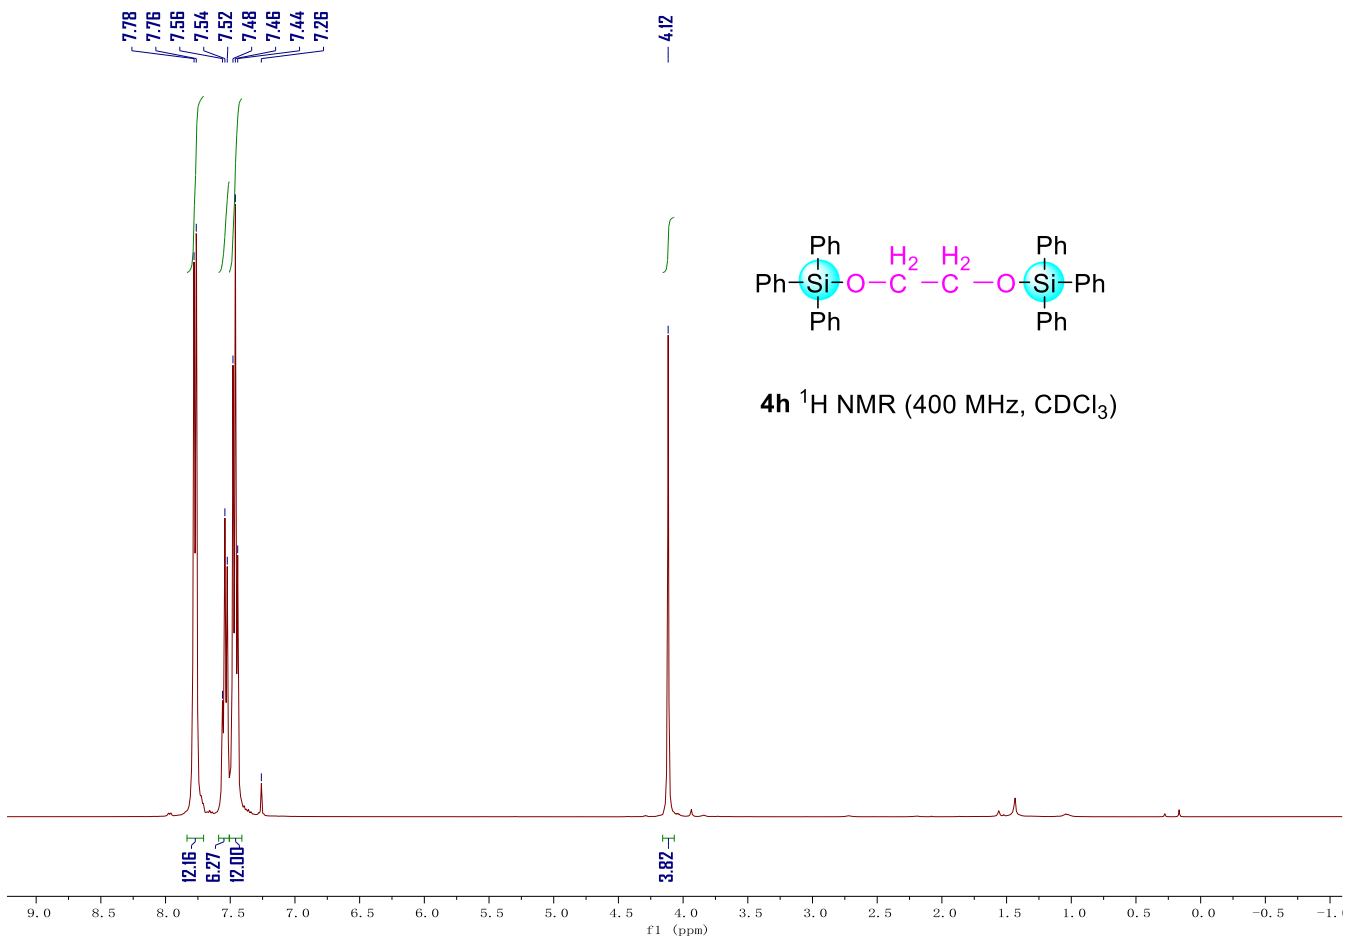



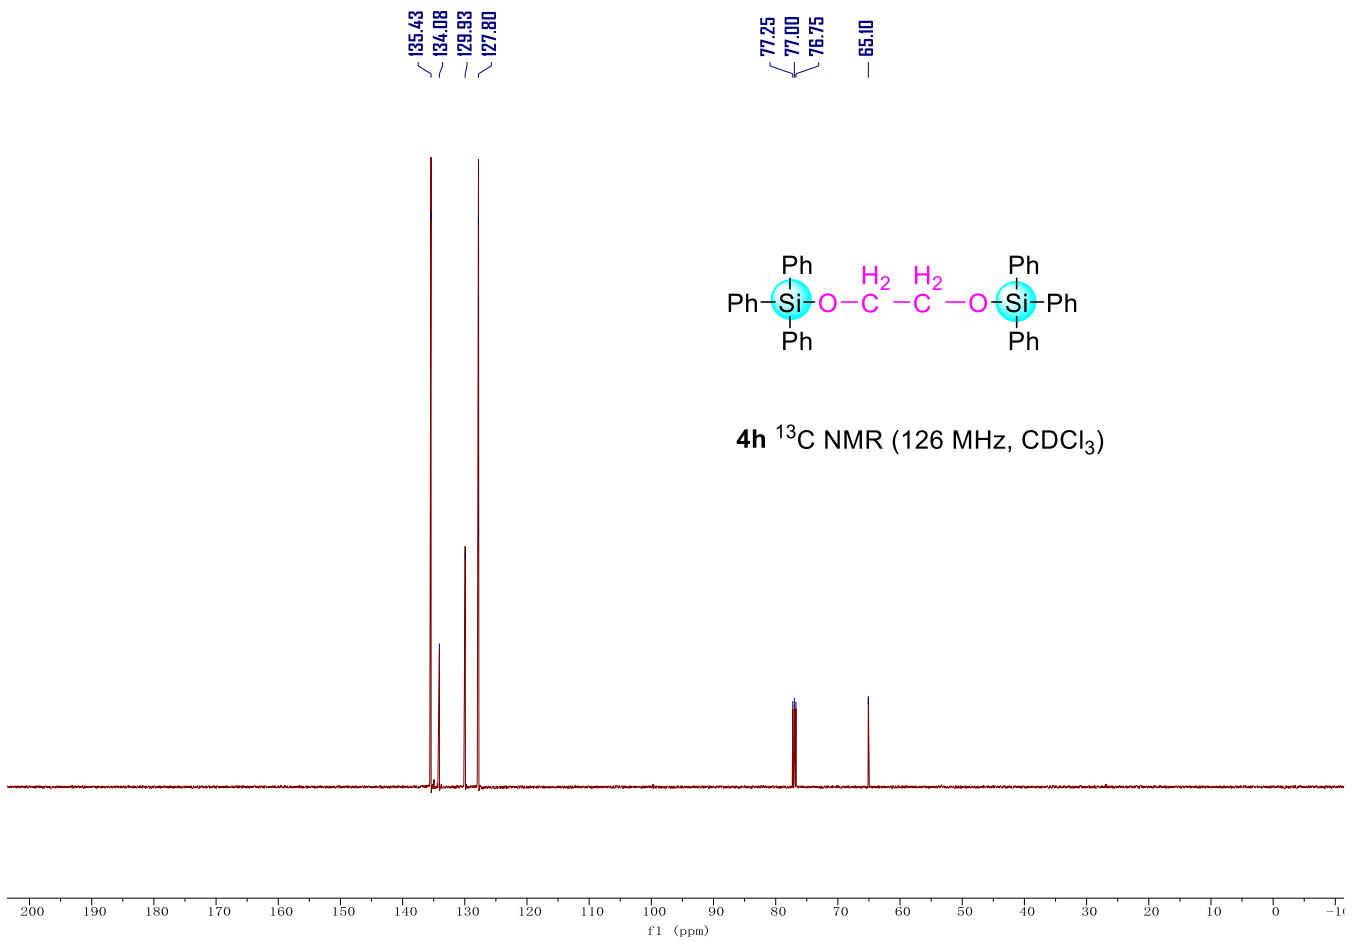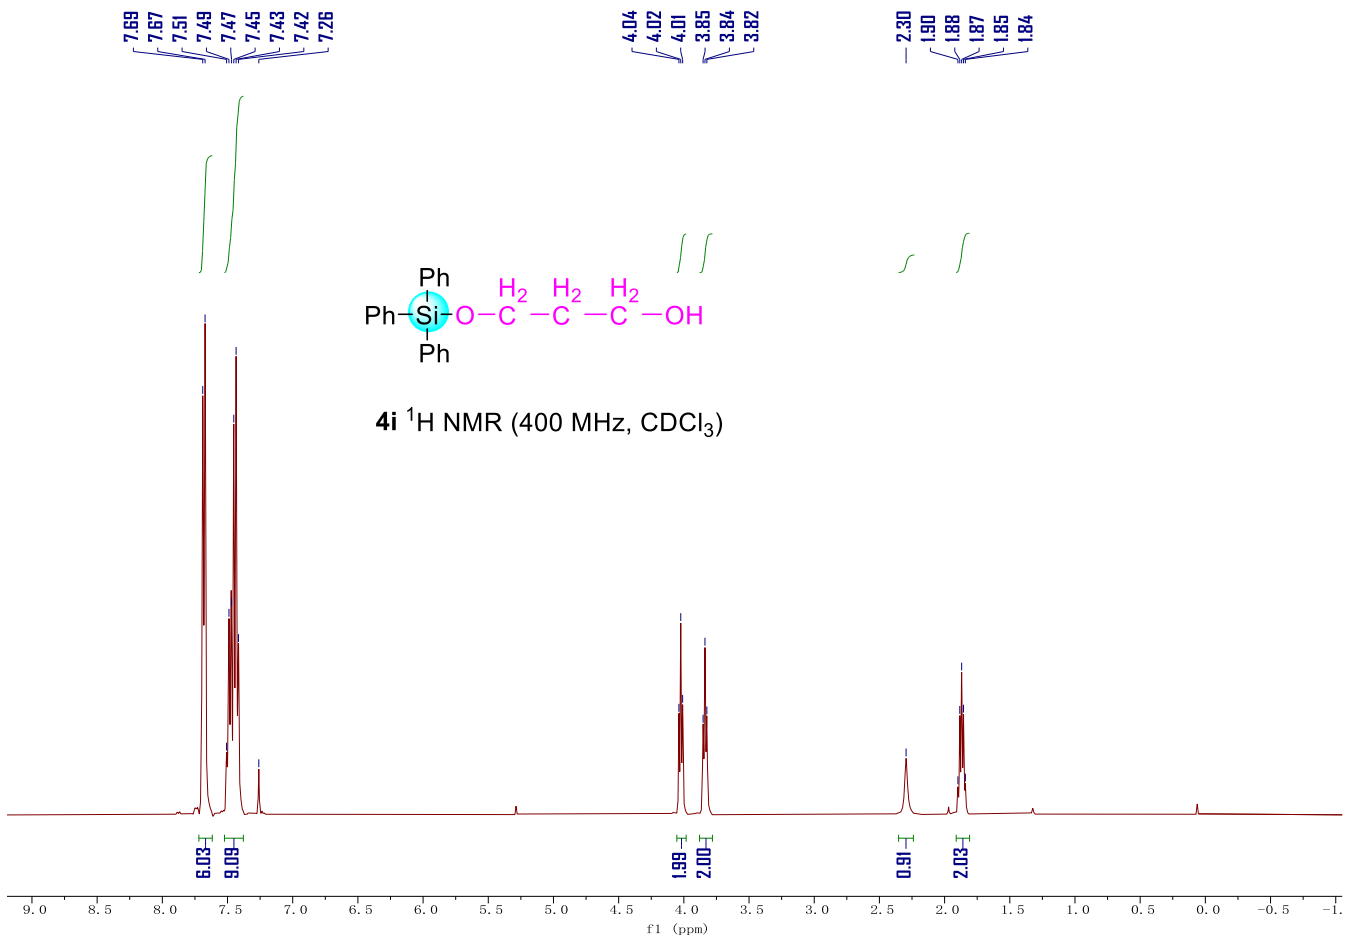

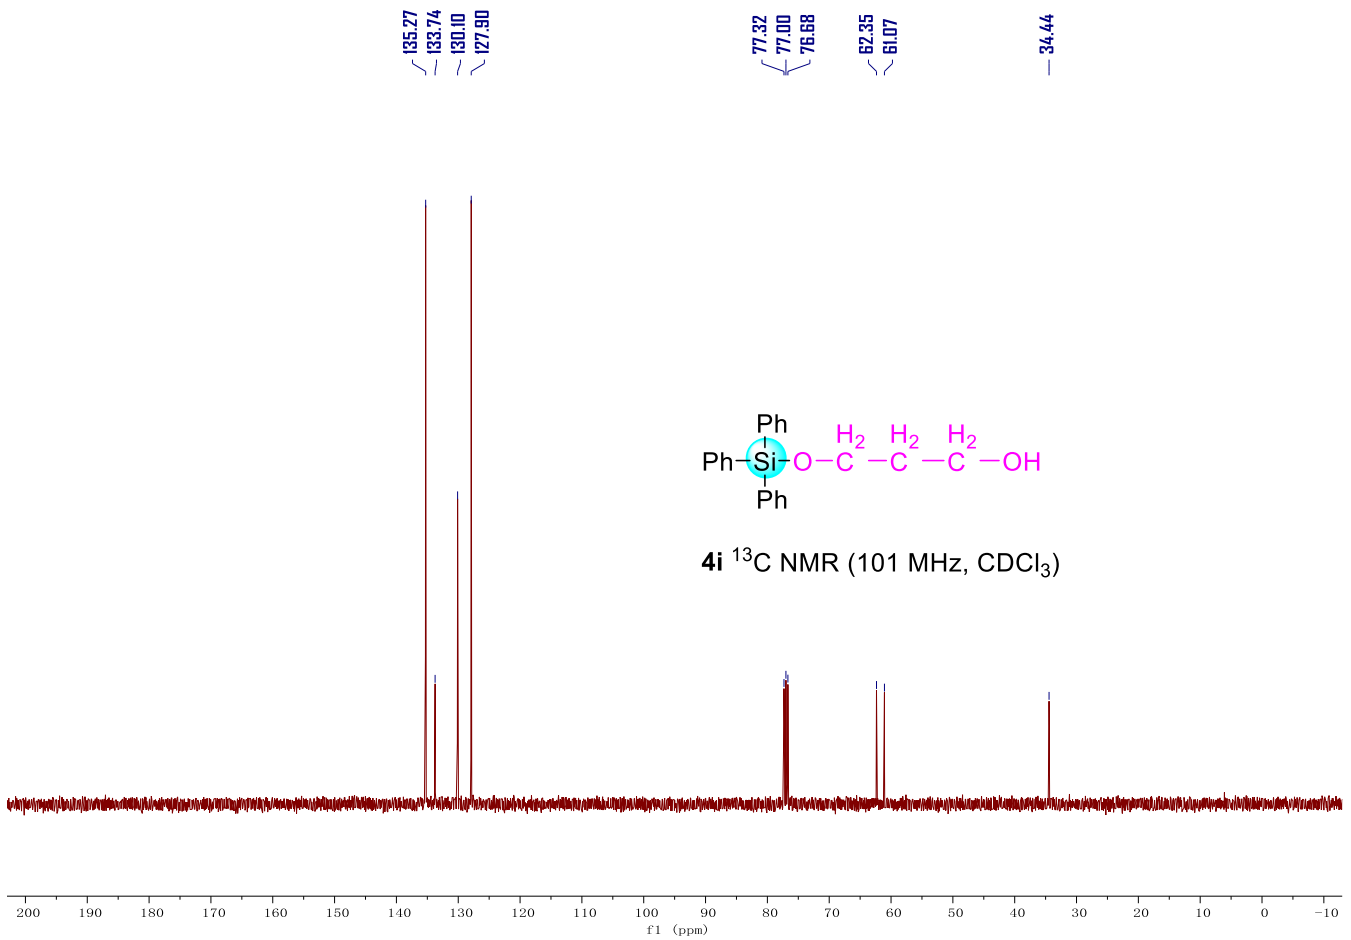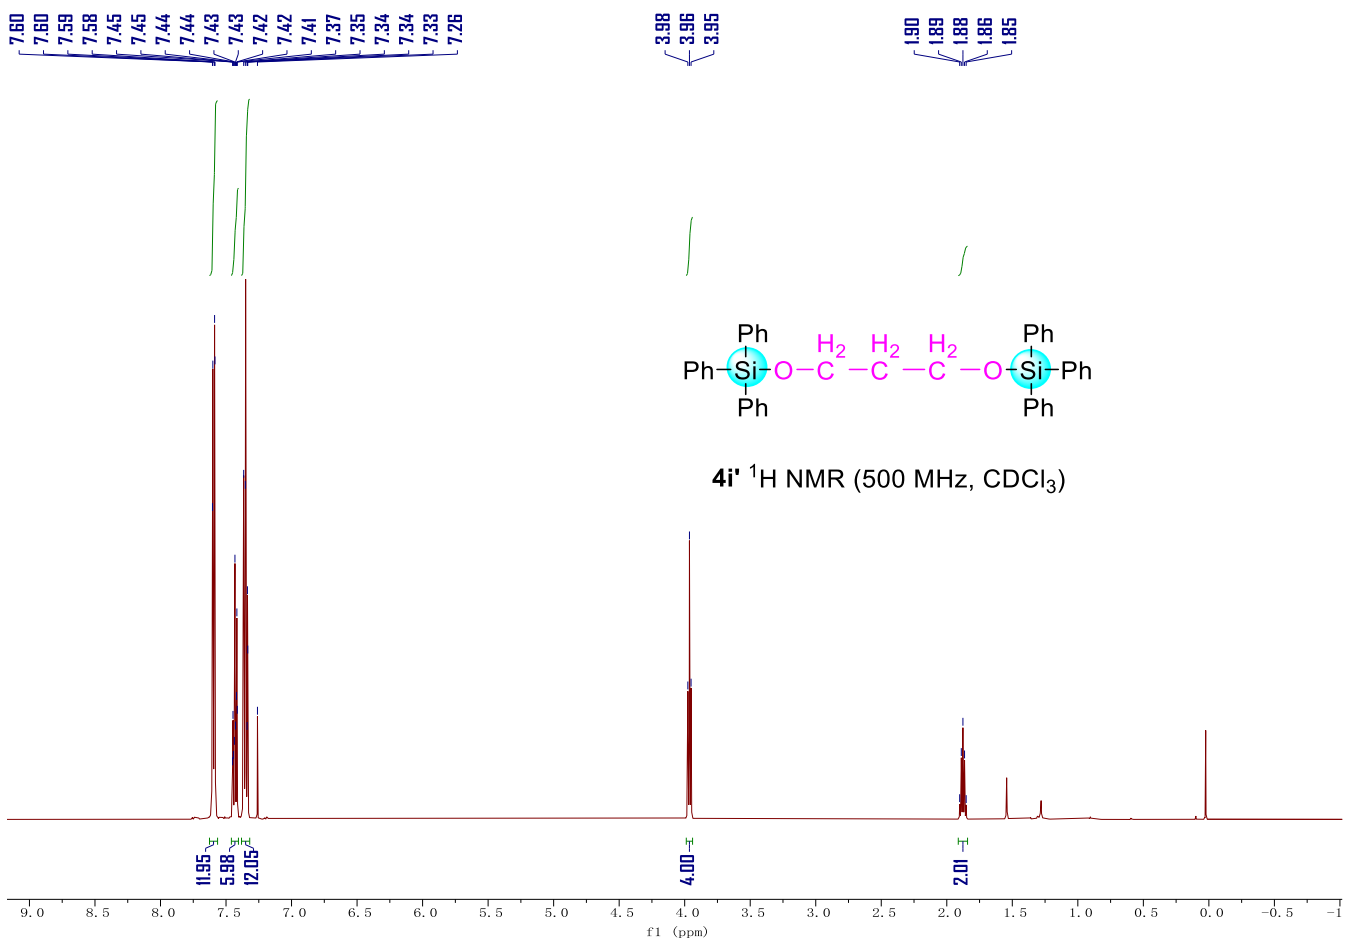

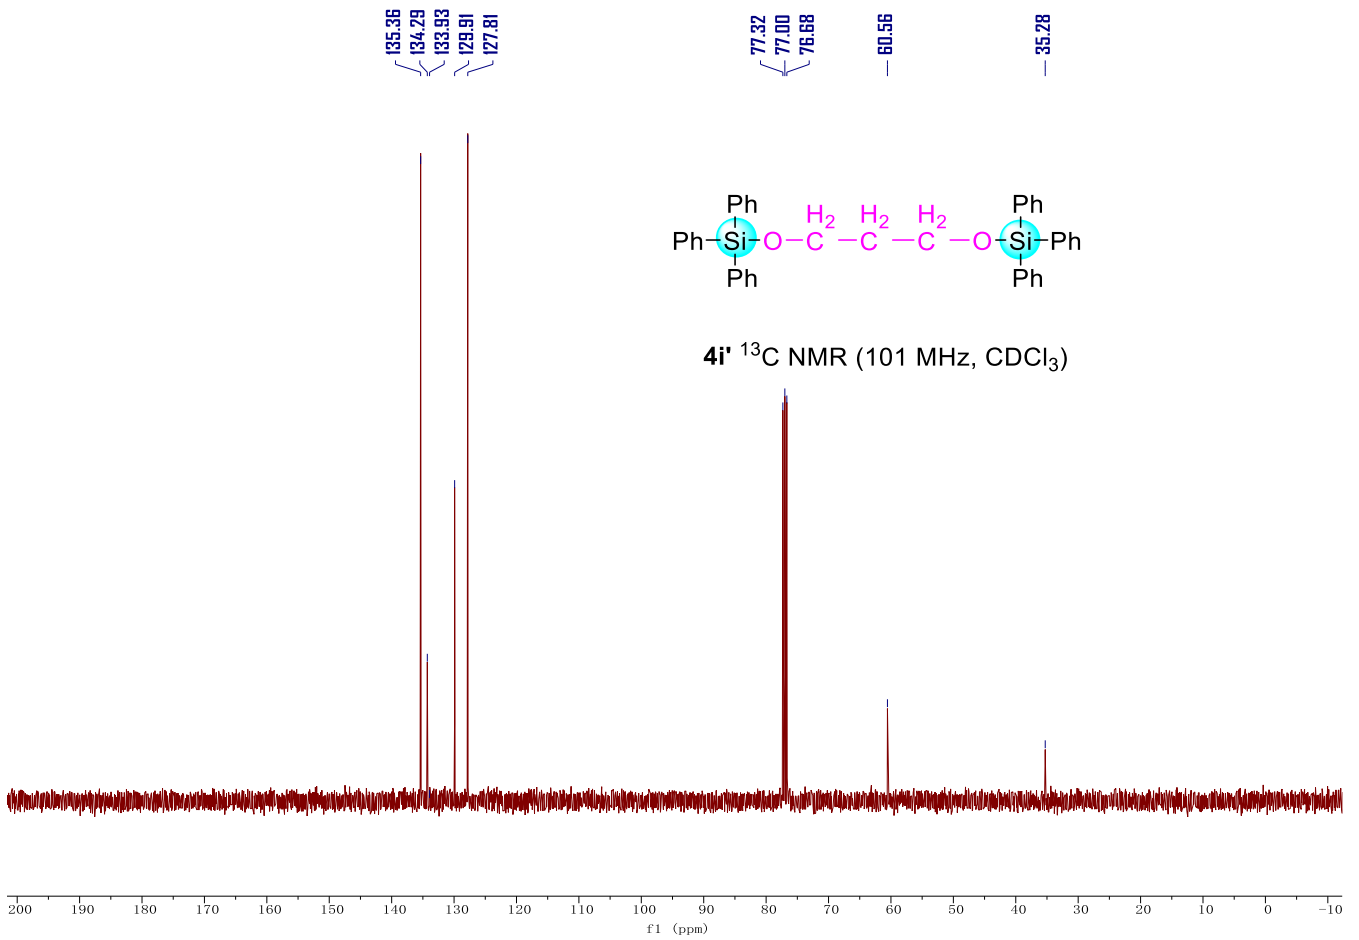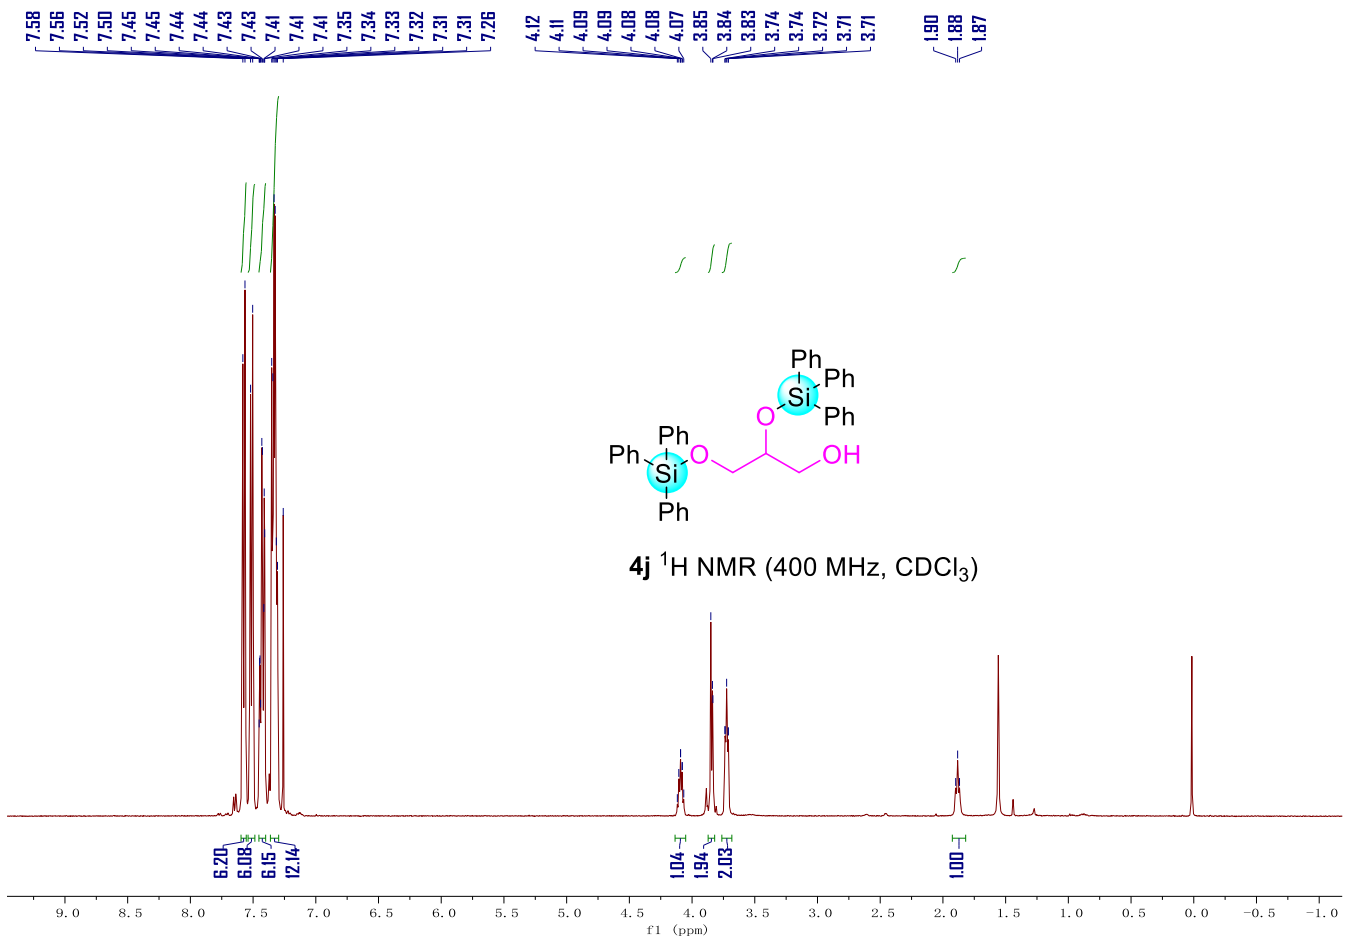

135.40  
135.32  
133.96  
133.58  
130.11  
130.05  
127.90  
127.86

77.32  
77.00  
76.68  
73.87  
64.83  
64.43

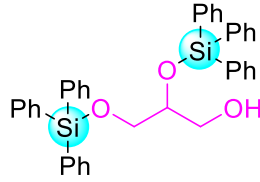

4j <sup>13</sup>C NMR (101 MHz, CDCl<sub>3</sub>)

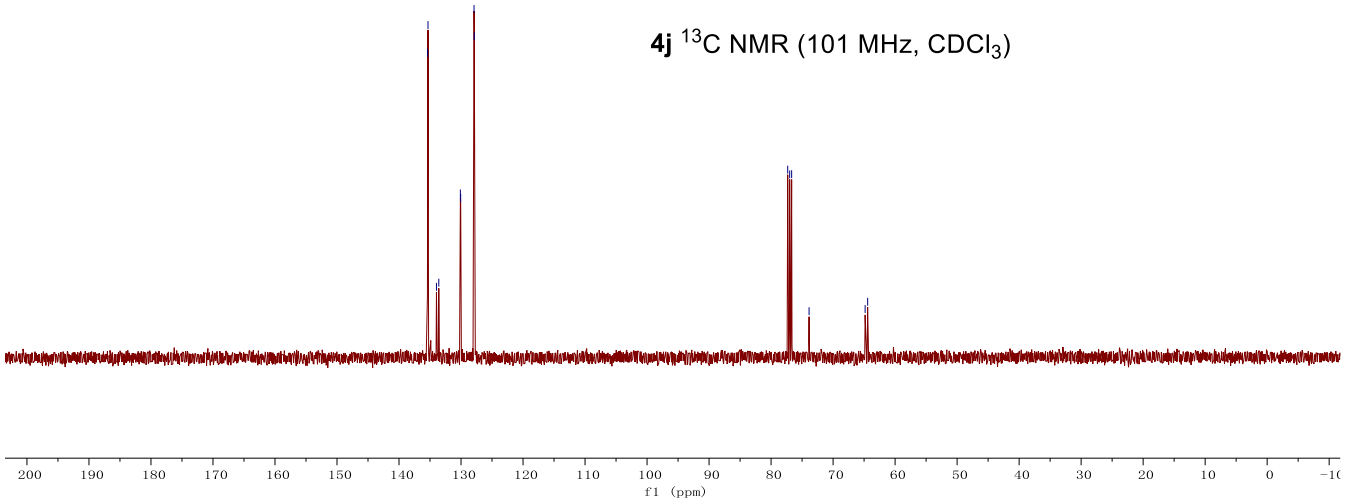

7.67  
7.67  
7.65  
7.65  
7.60  
7.58  
7.47  
7.46  
7.45  
7.44  
7.44  
7.42  
7.40  
7.39  
7.38  
7.25

3.66

1.35

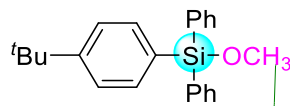

4k <sup>1</sup>H NMR (400 MHz, CDCl<sub>3</sub>)

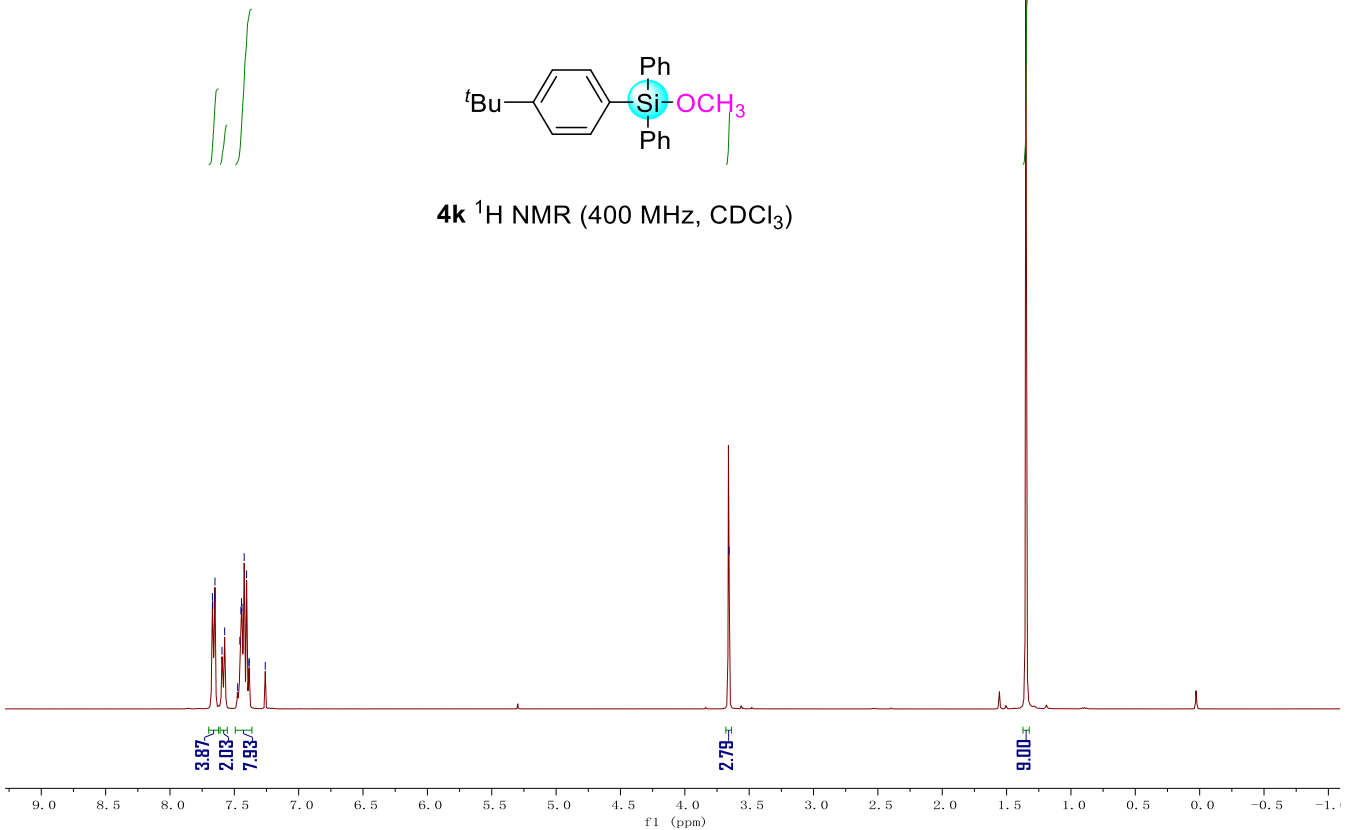

153.03  
 135.37 135.28 134.17 130.22 129.94 127.83 124.86  
 77.32 77.00 76.68  
 51.82  
 34.75 31.20

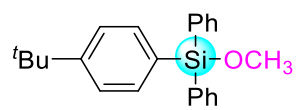

4k <sup>13</sup>C NMR (101 MHz, CDCl<sub>3</sub>)

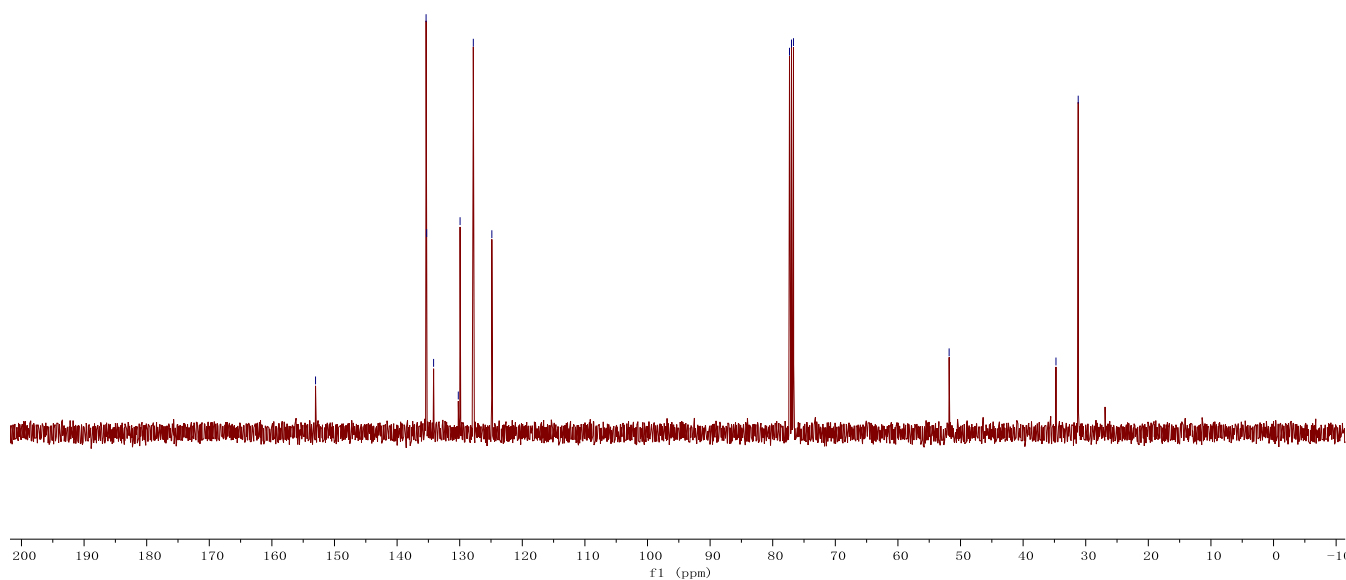

7.70 7.70 7.69 7.68 7.68 7.67 7.59 7.58 7.58 7.51 7.49 7.49 7.47 7.46 7.44 7.42 7.29 7.27  
 3.89  
 2.43

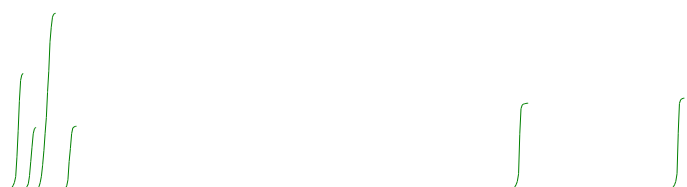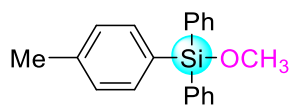

4l <sup>1</sup>H NMR (400 MHz, CDCl<sub>3</sub>)

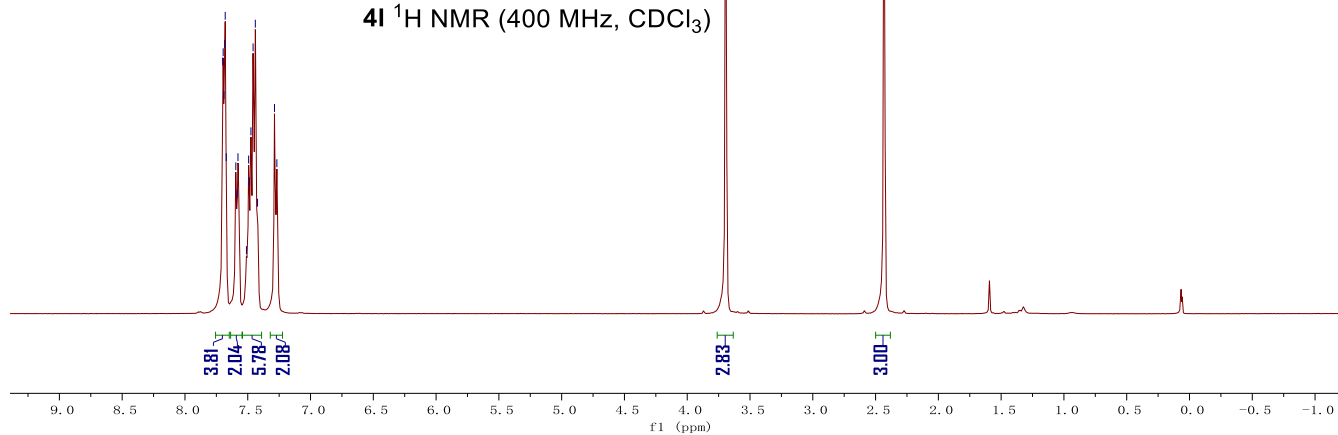

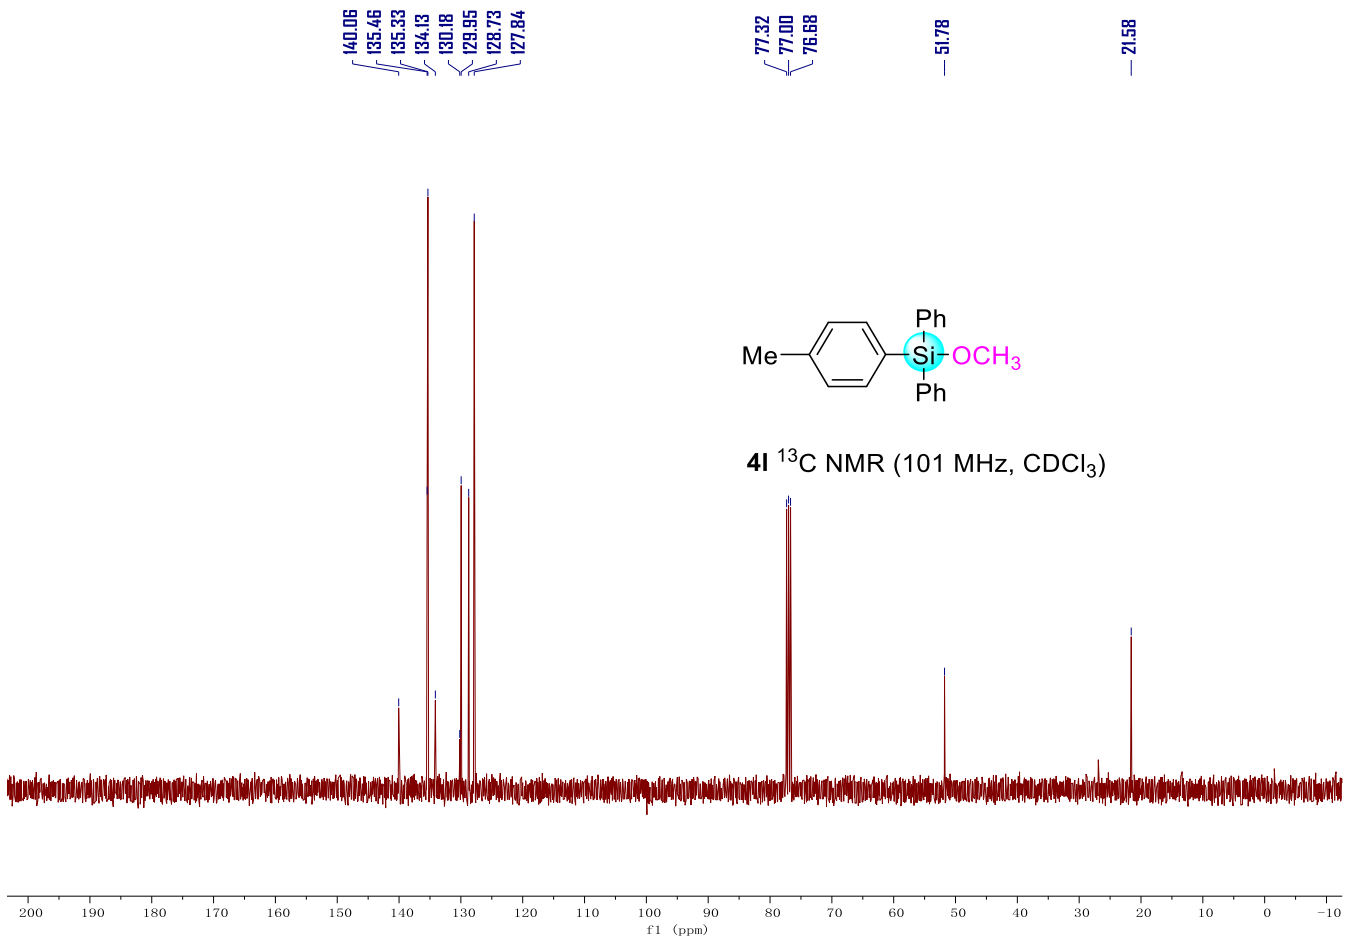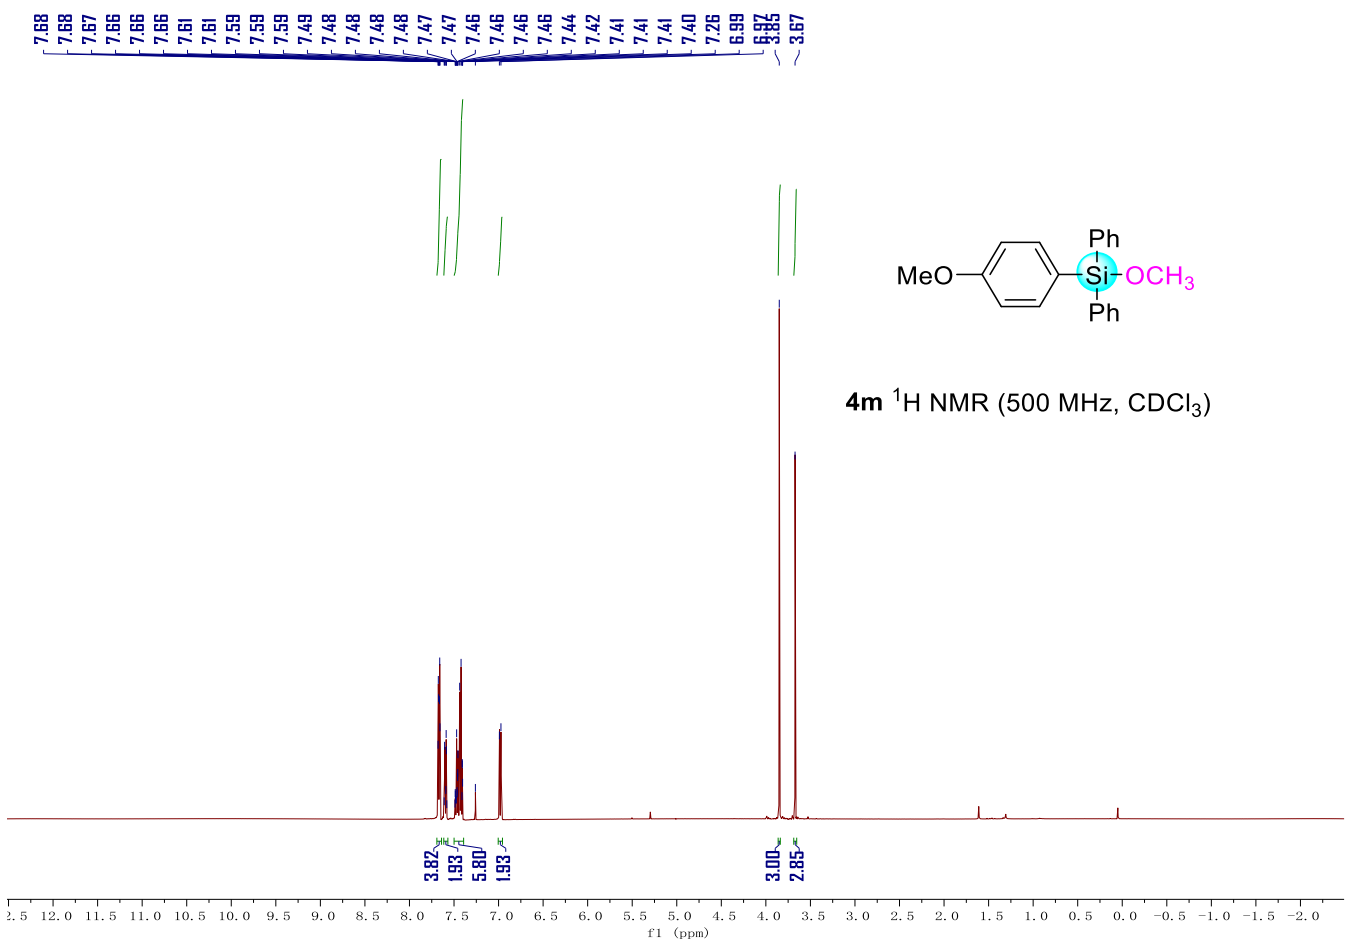

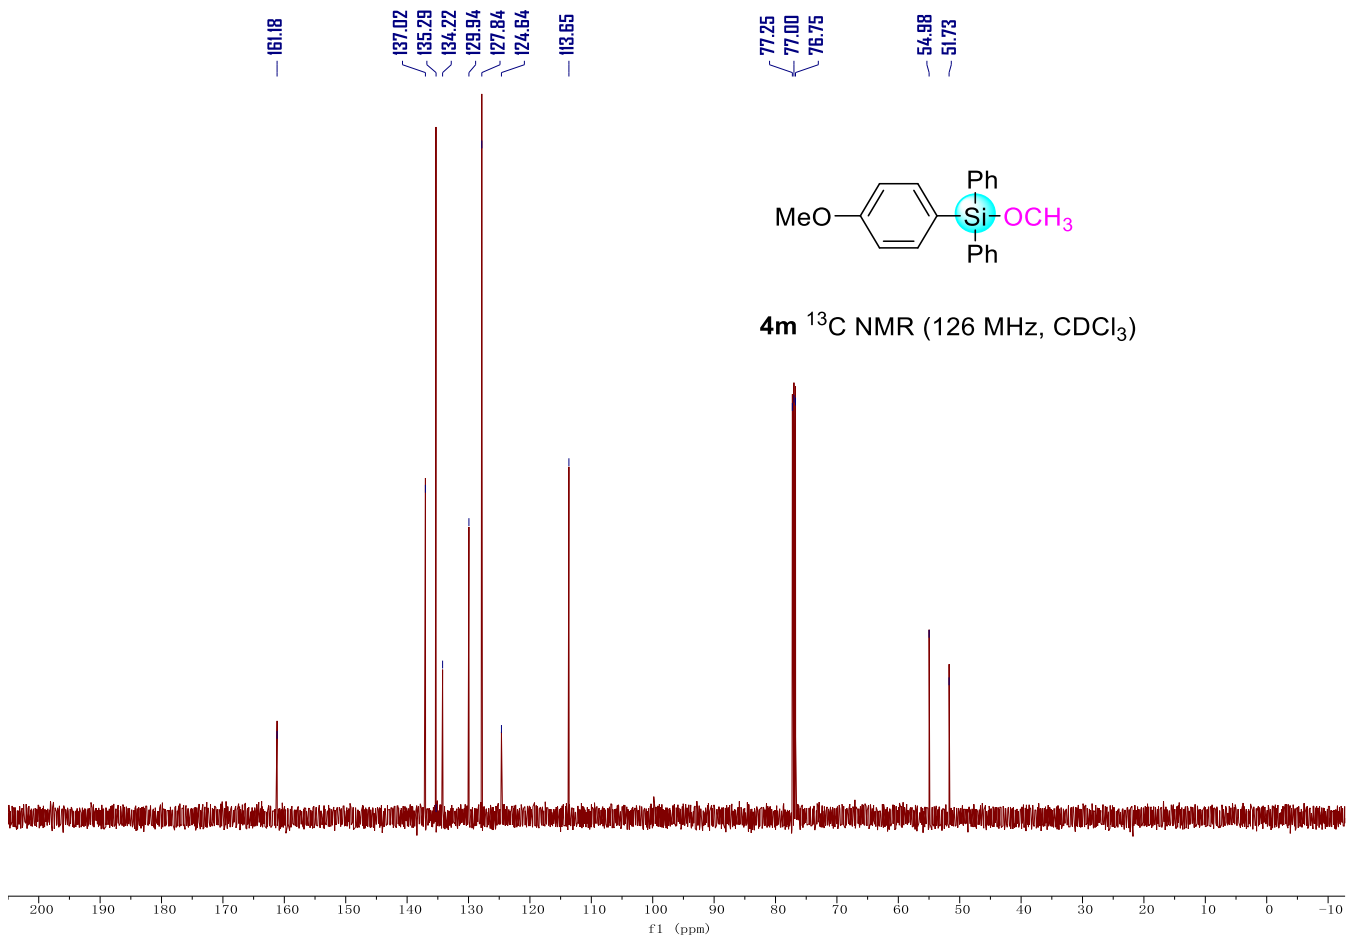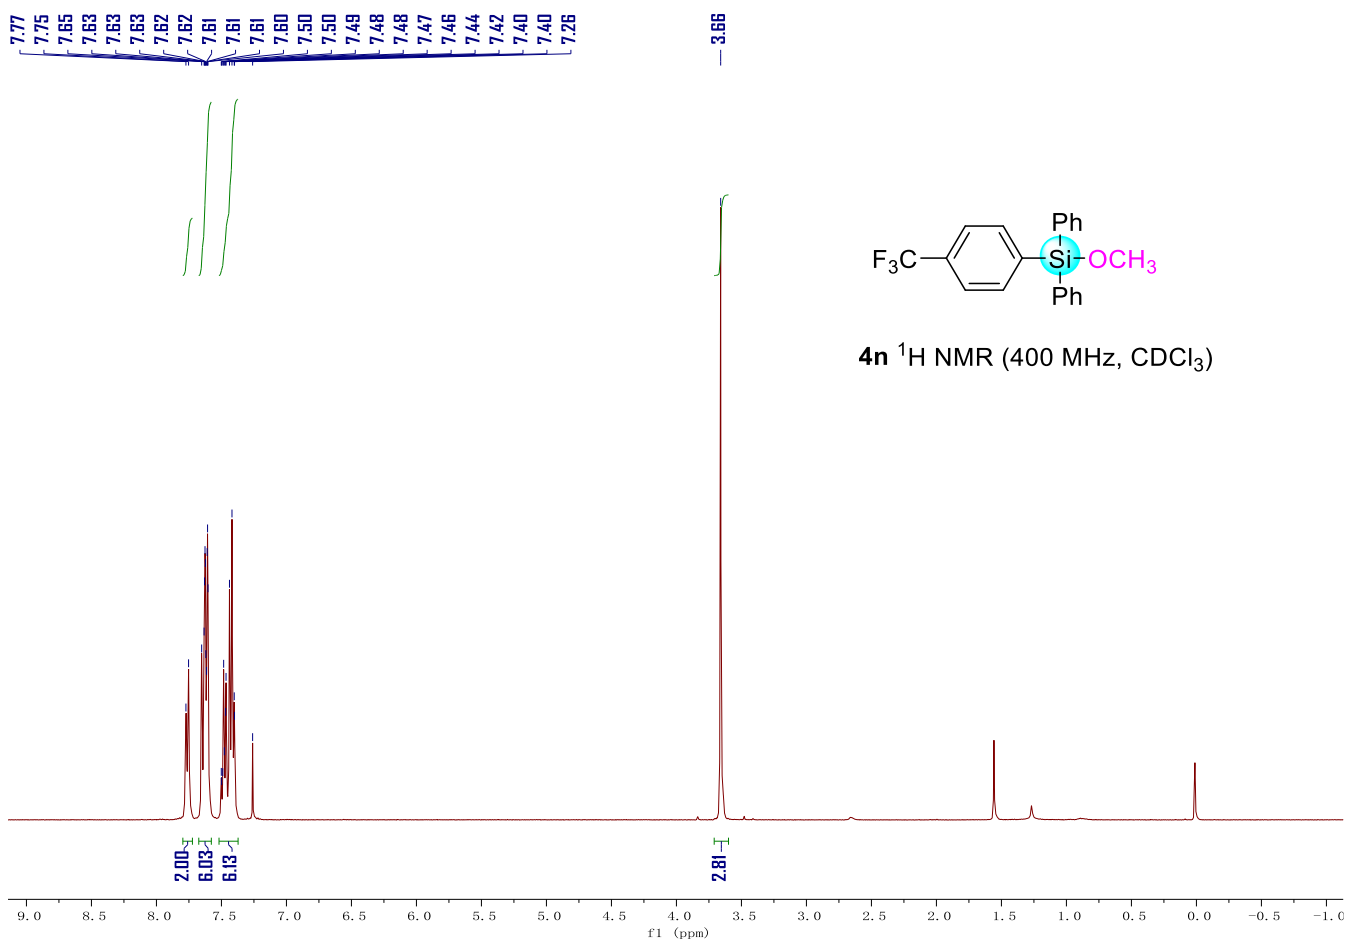

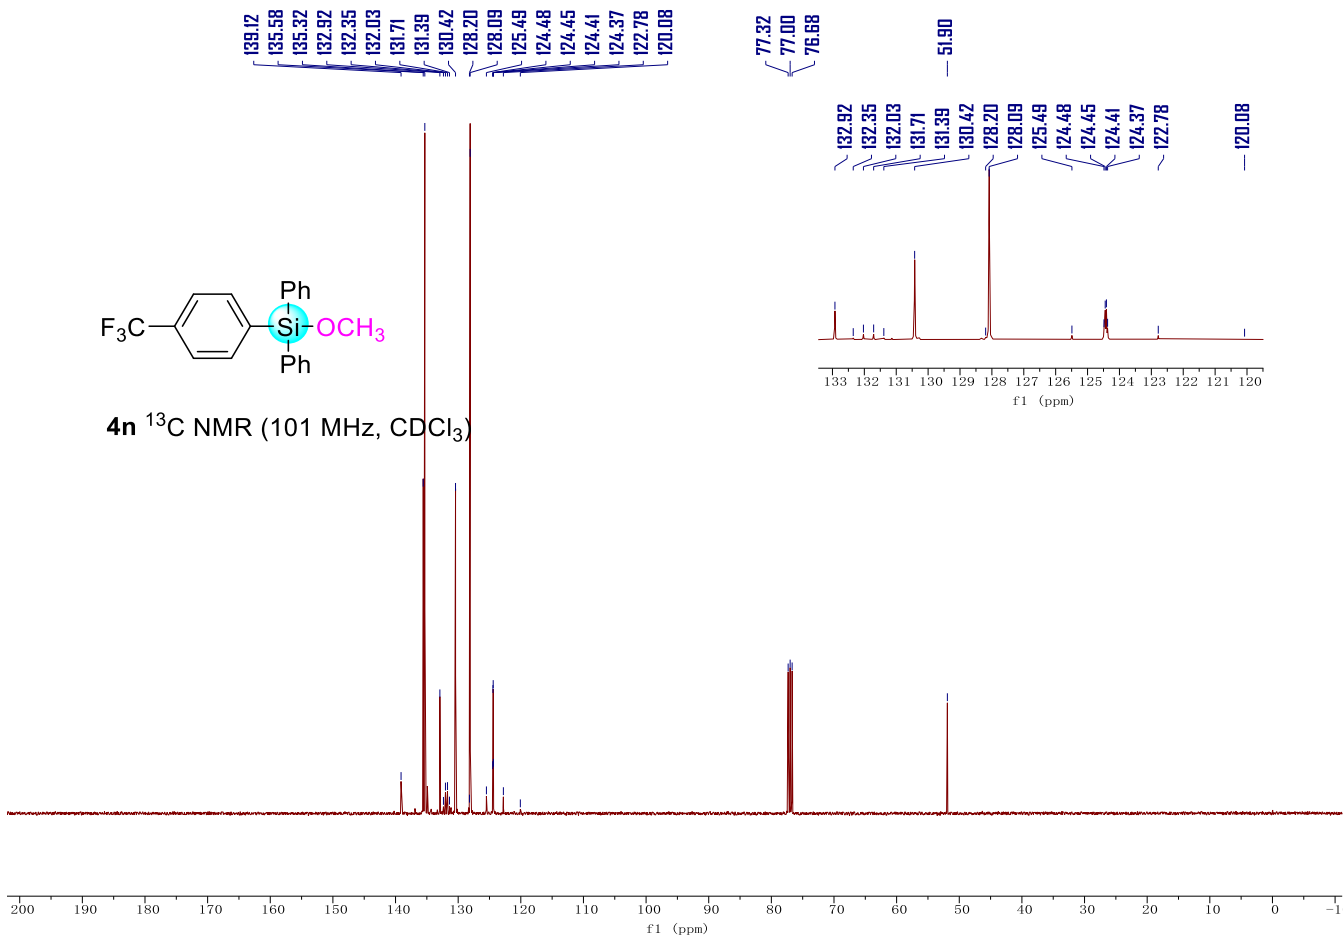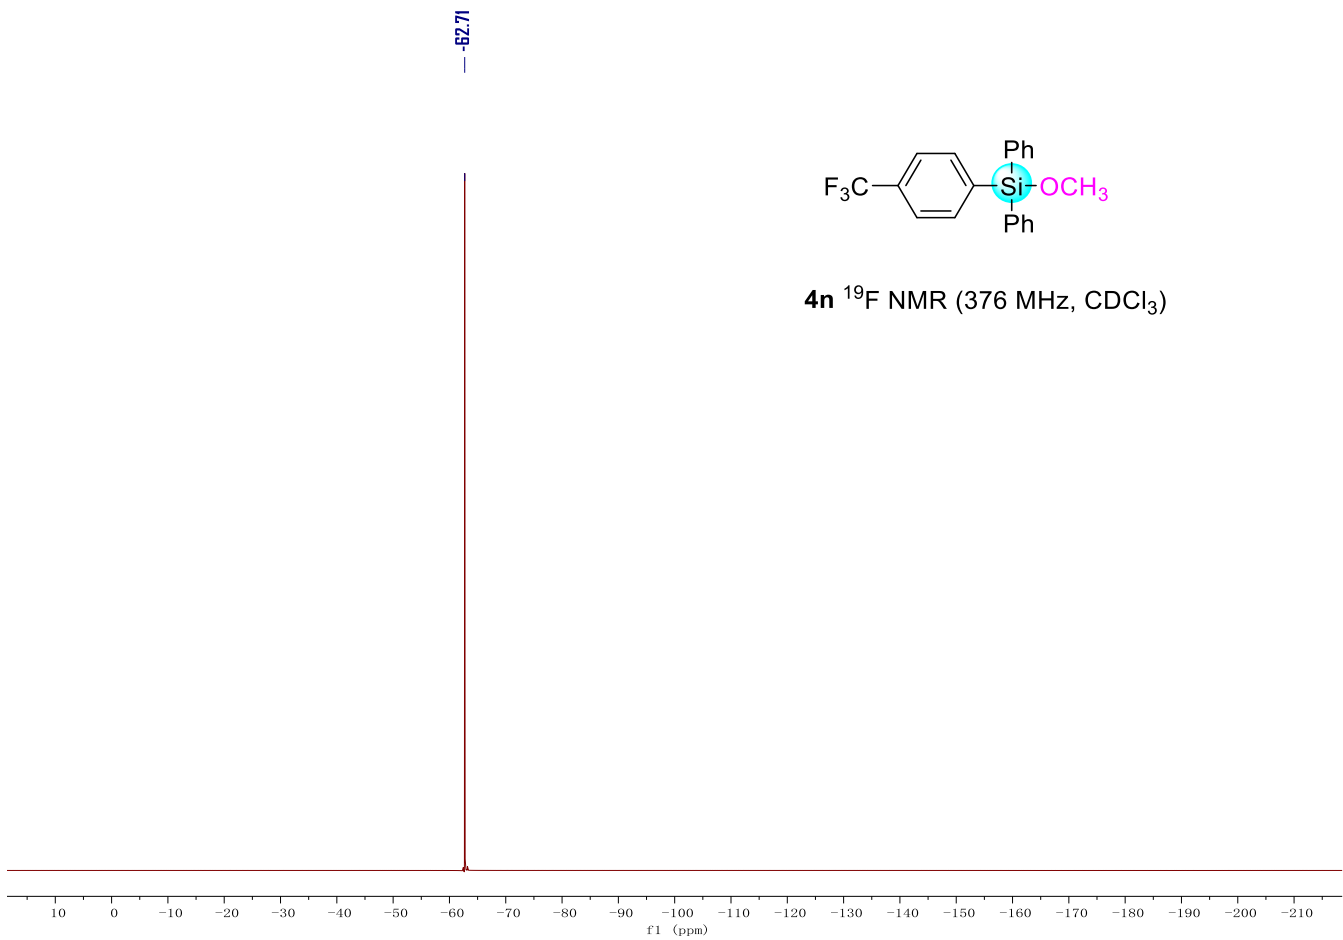



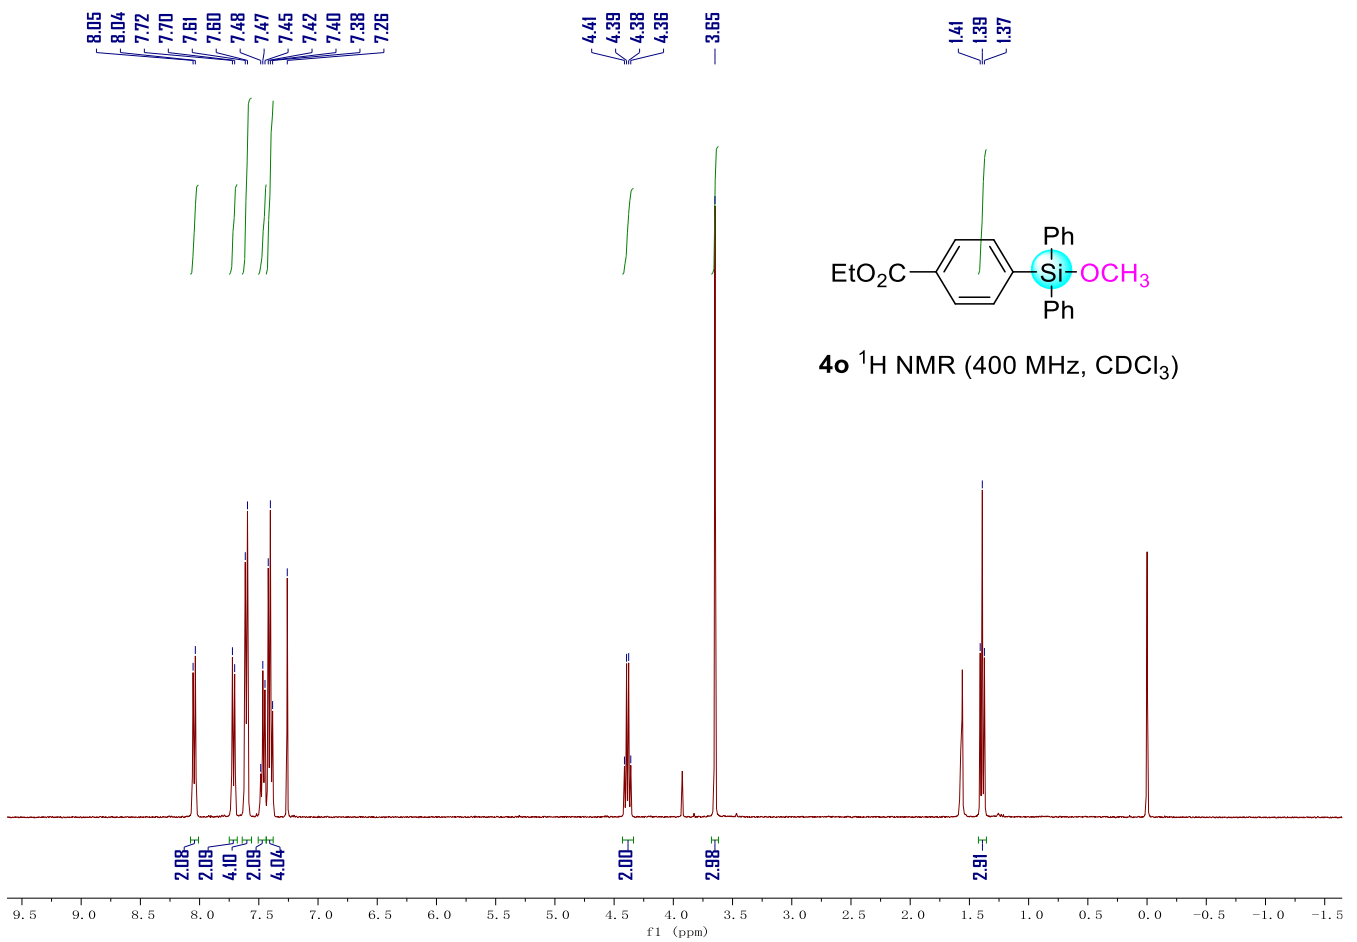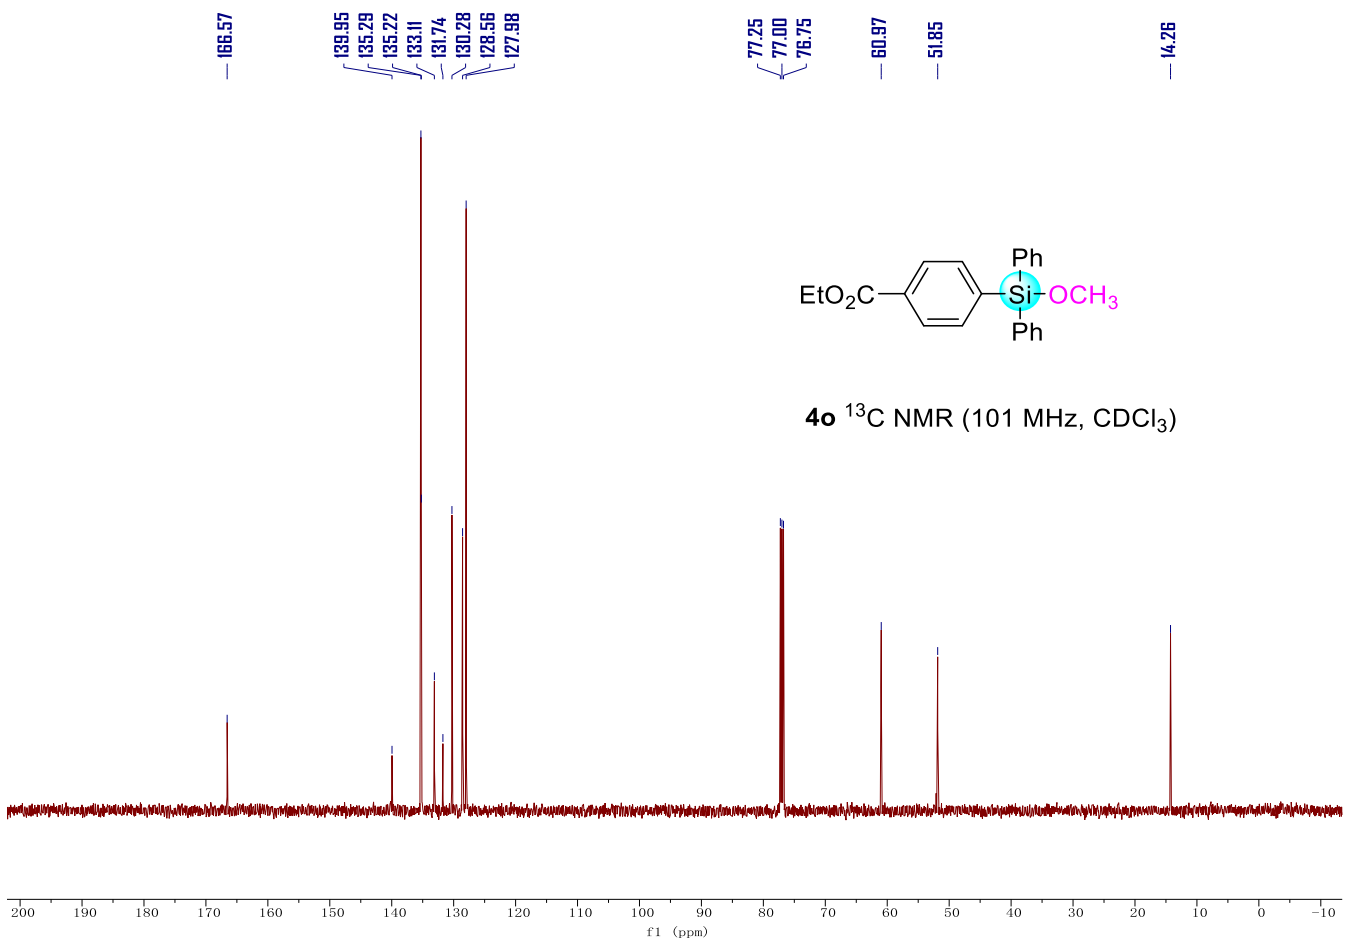

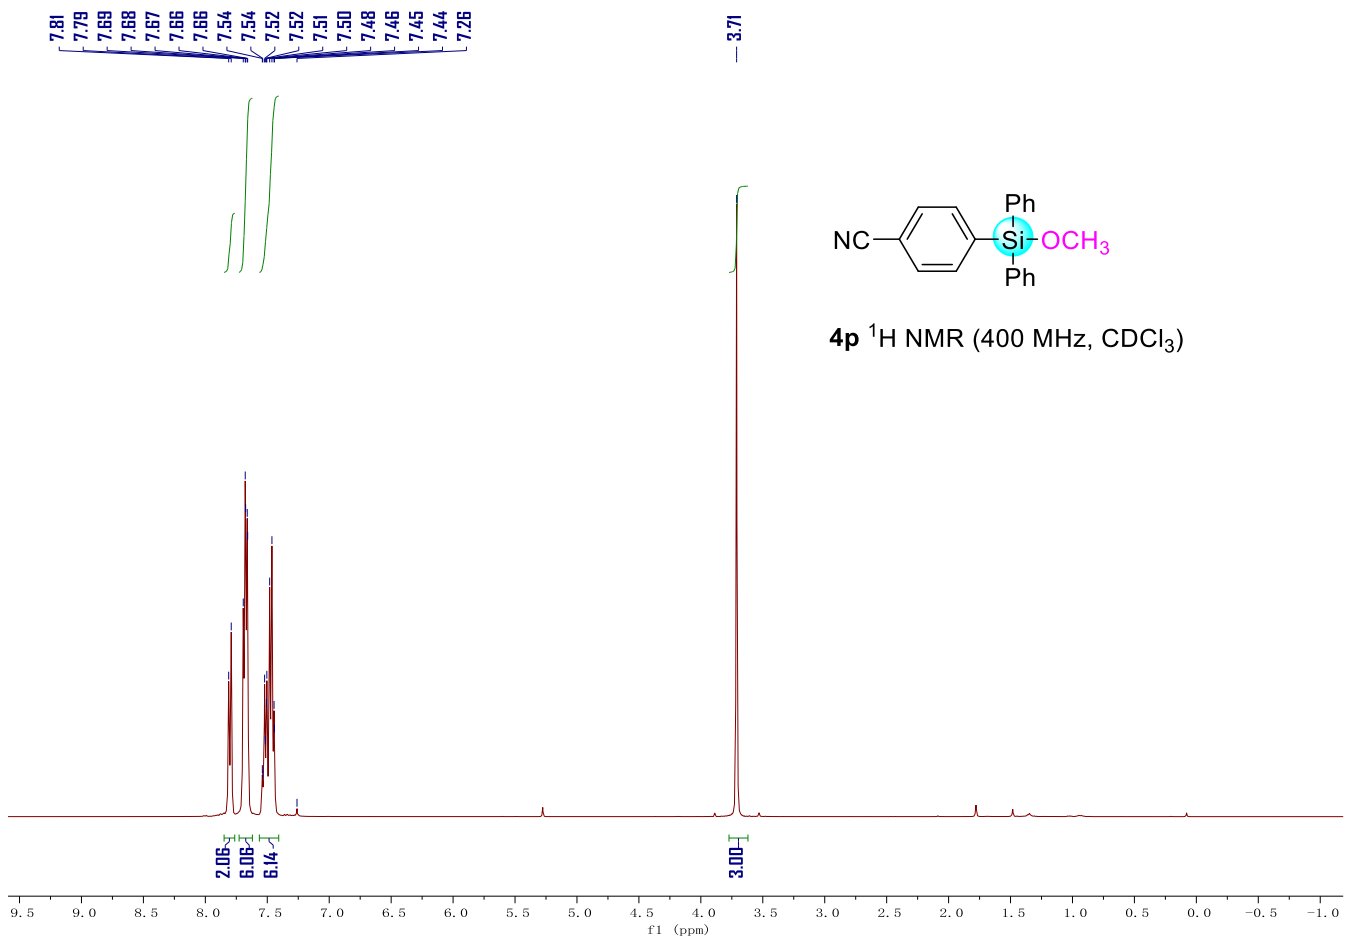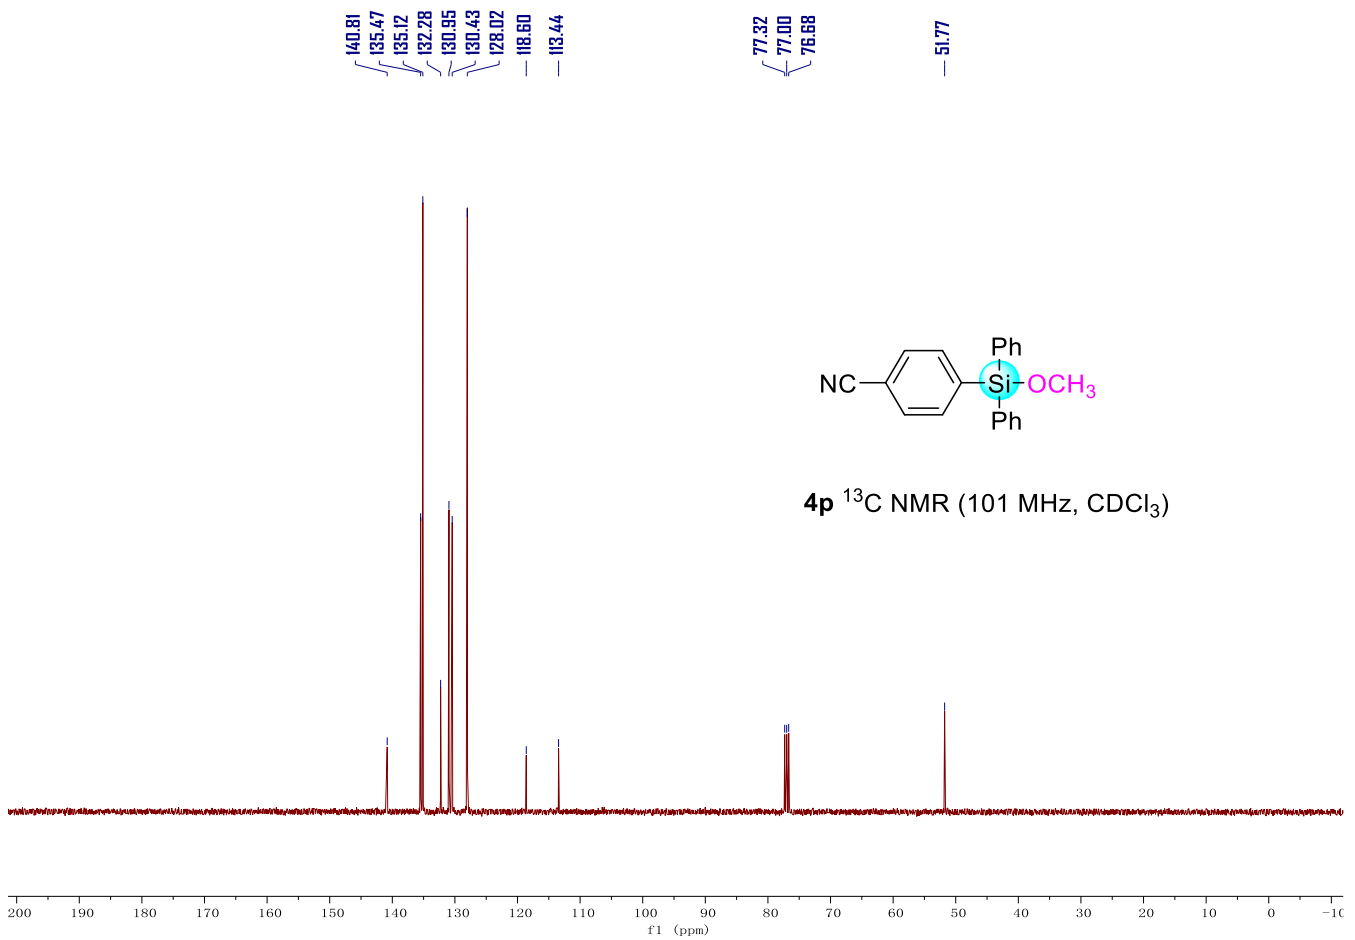

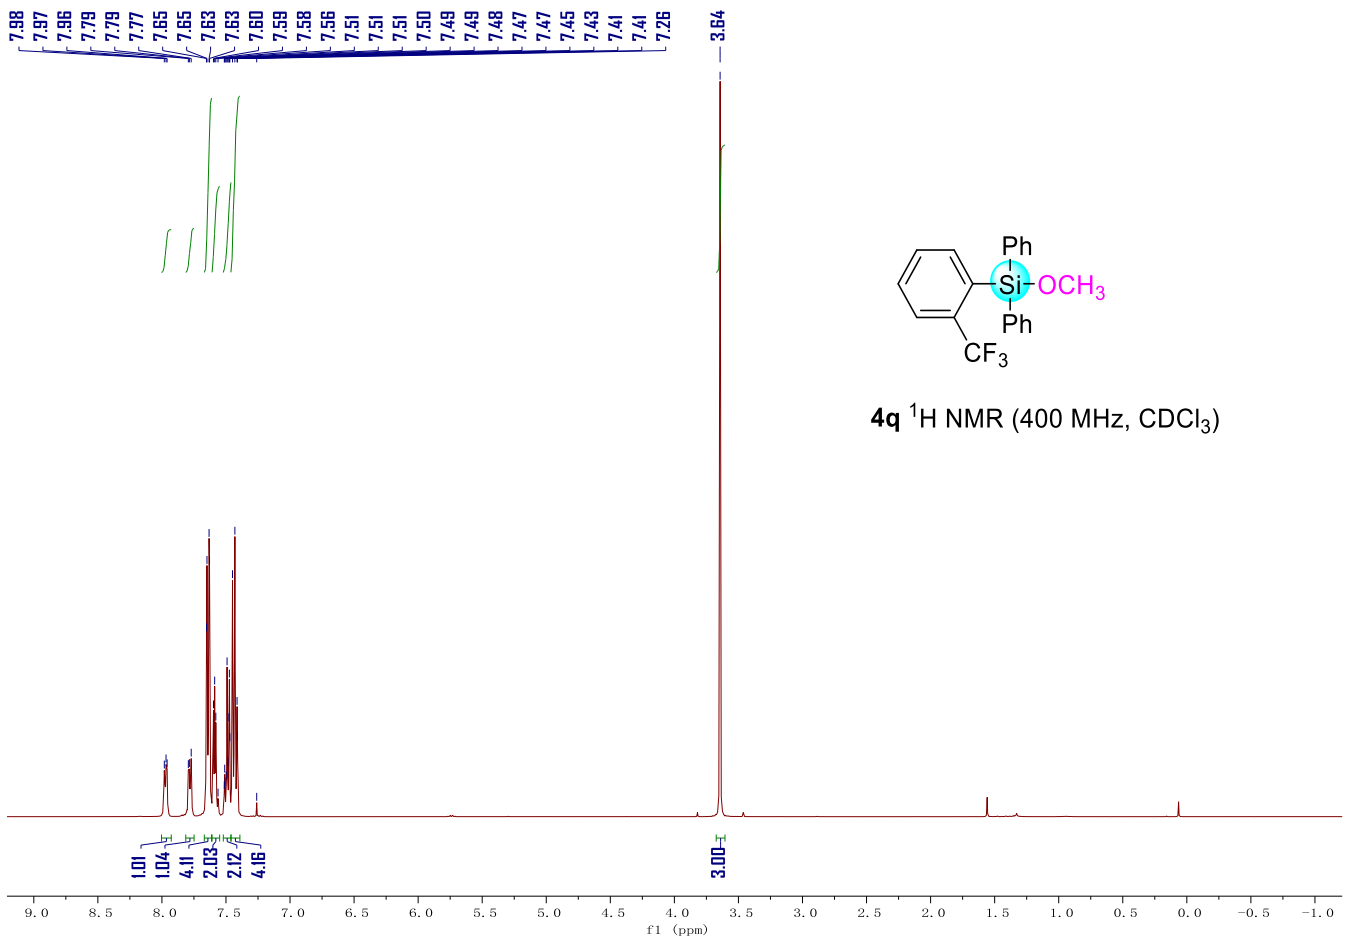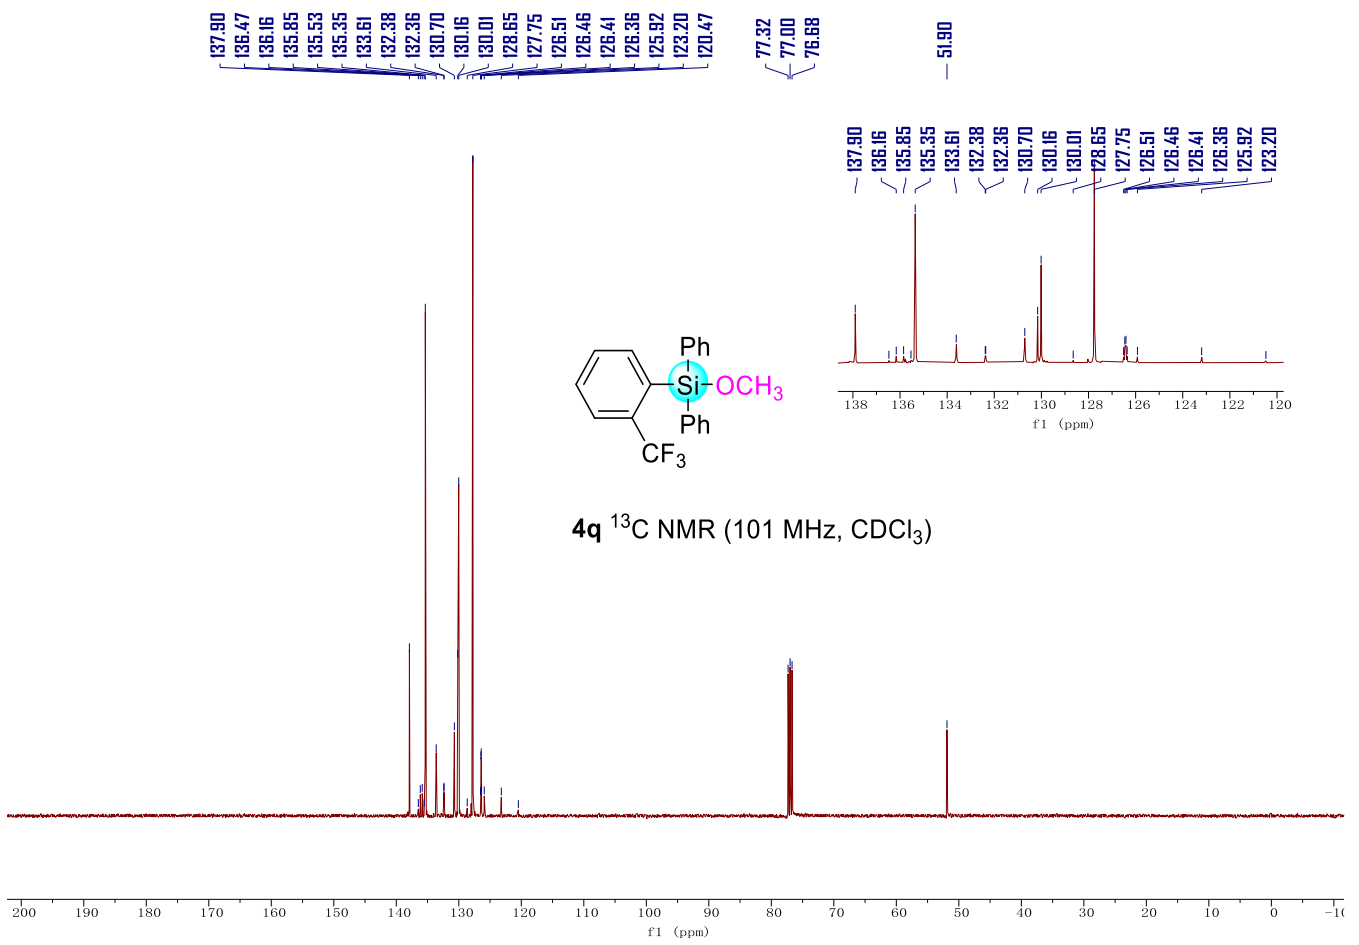

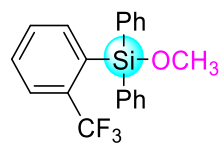

**4q**  $^{19}\text{F}$  NMR (376 MHz,  $\text{CDCl}_3$ )

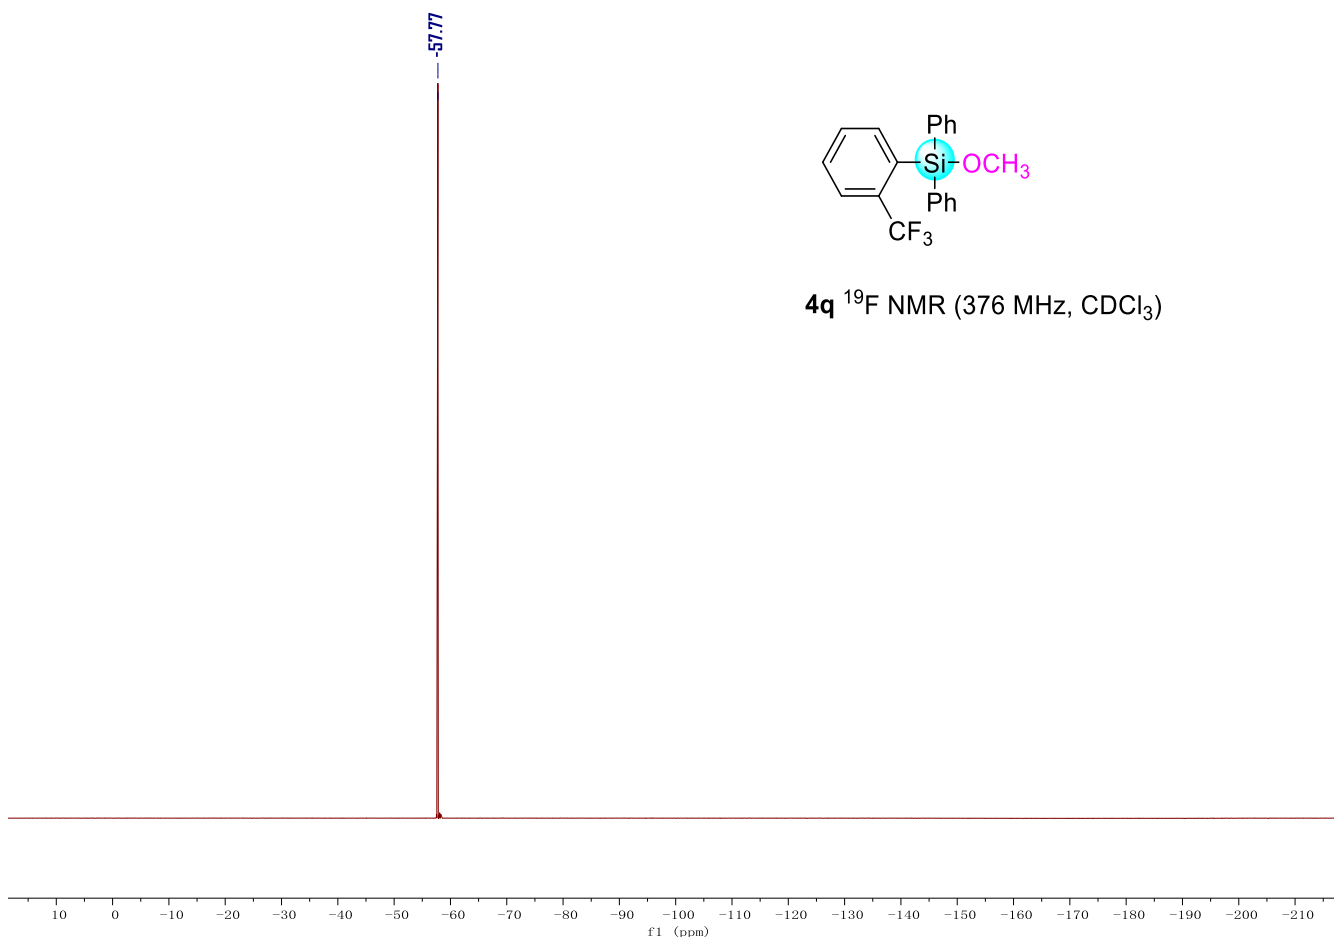

8.09, 8.08, 8.07, 8.06, 7.99, 7.97, 7.73, 7.73, 7.73, 7.71, 7.71, 7.61, 7.61, 7.59, 7.59, 7.49, 7.48, 7.48, 7.47, 7.45, 7.45, 7.44, 7.44, 7.42, 7.40, 7.39, 7.38, 7.38, 7.37, 7.35, 7.34, 7.34, 7.32, 7.32, 7.26, 7.26, 3.78

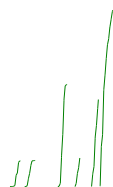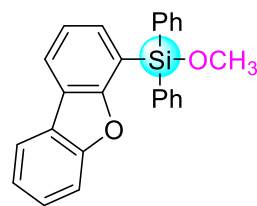

**4r**  $^1\text{H}$  NMR (400 MHz,  $\text{CDCl}_3$ )

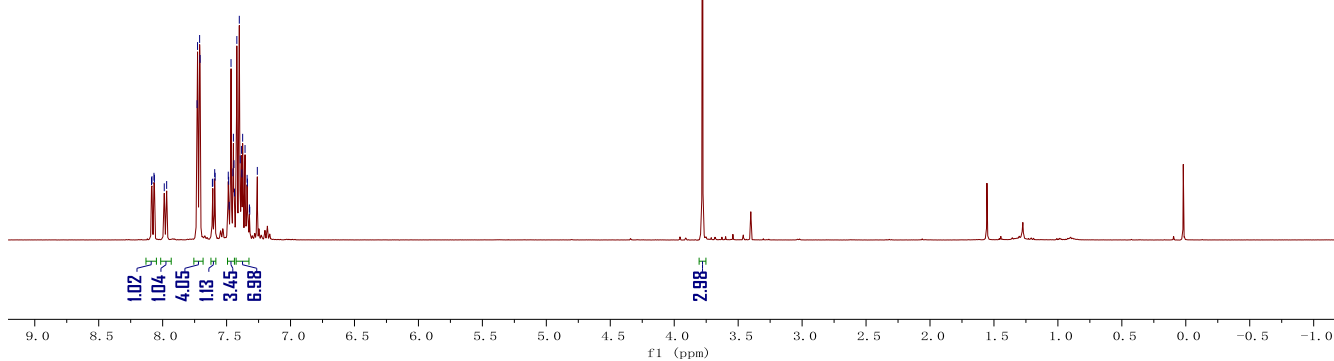

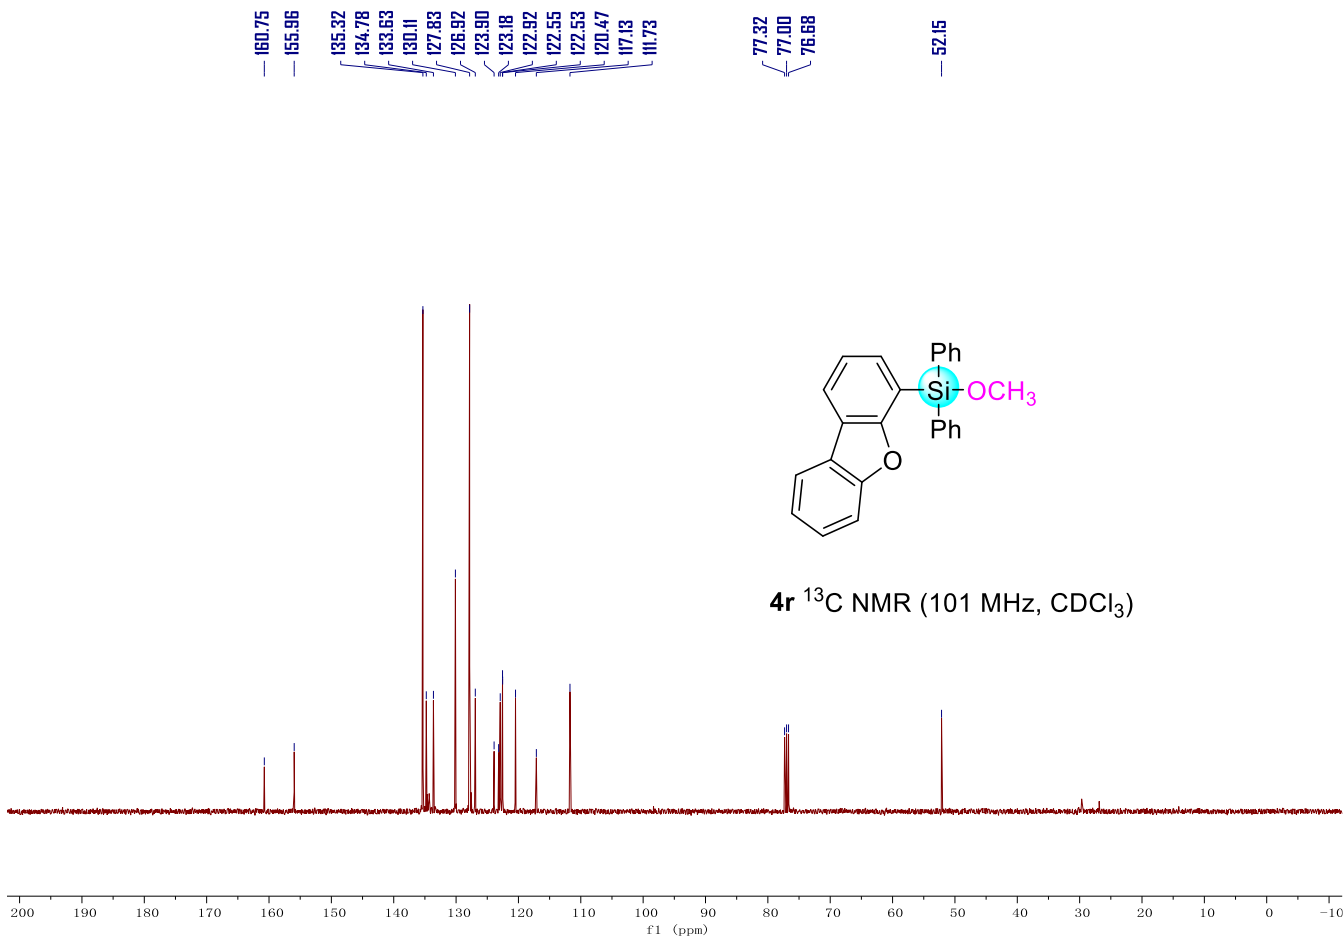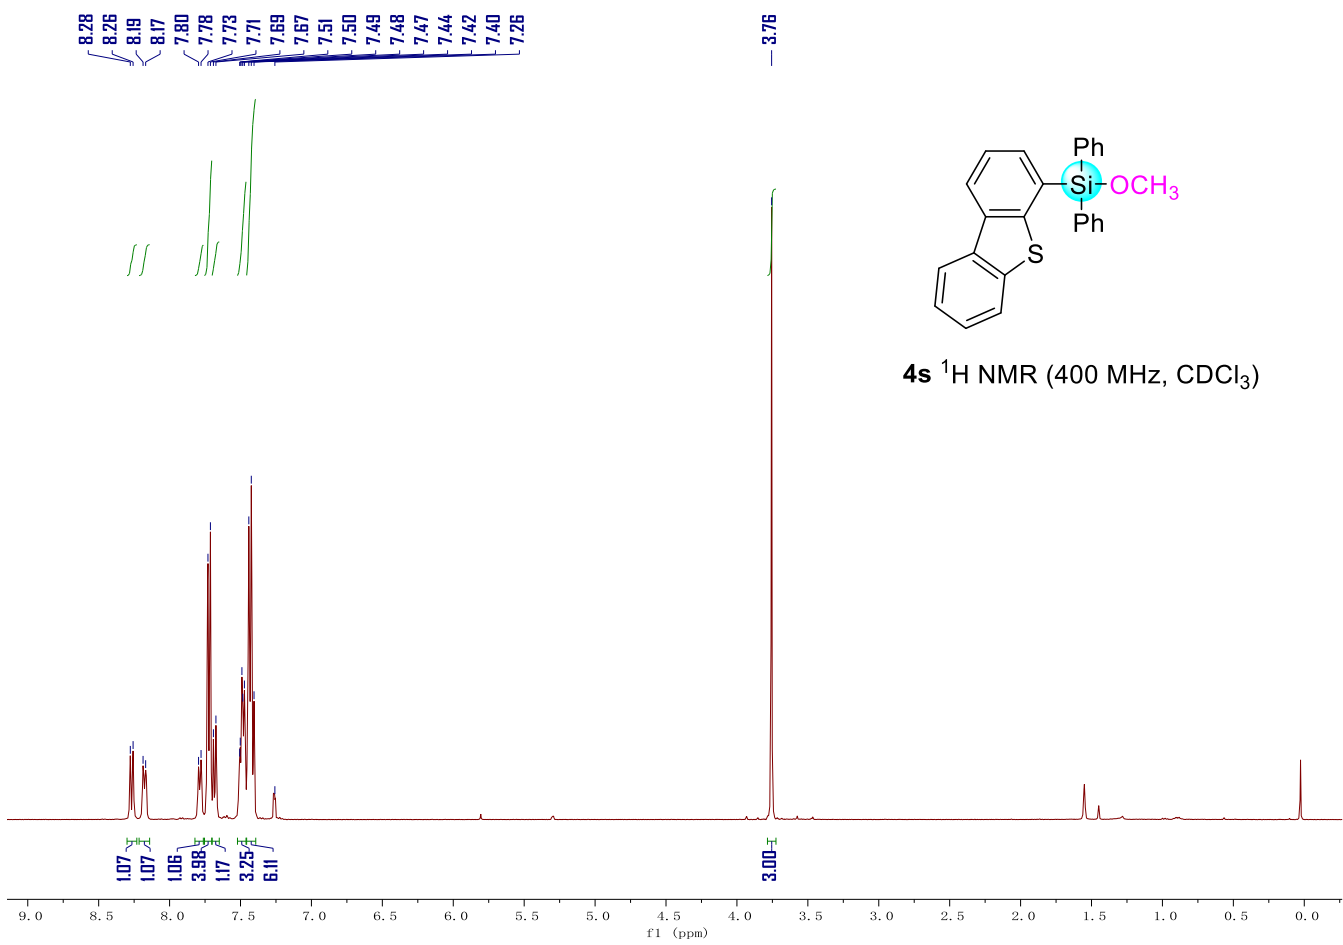

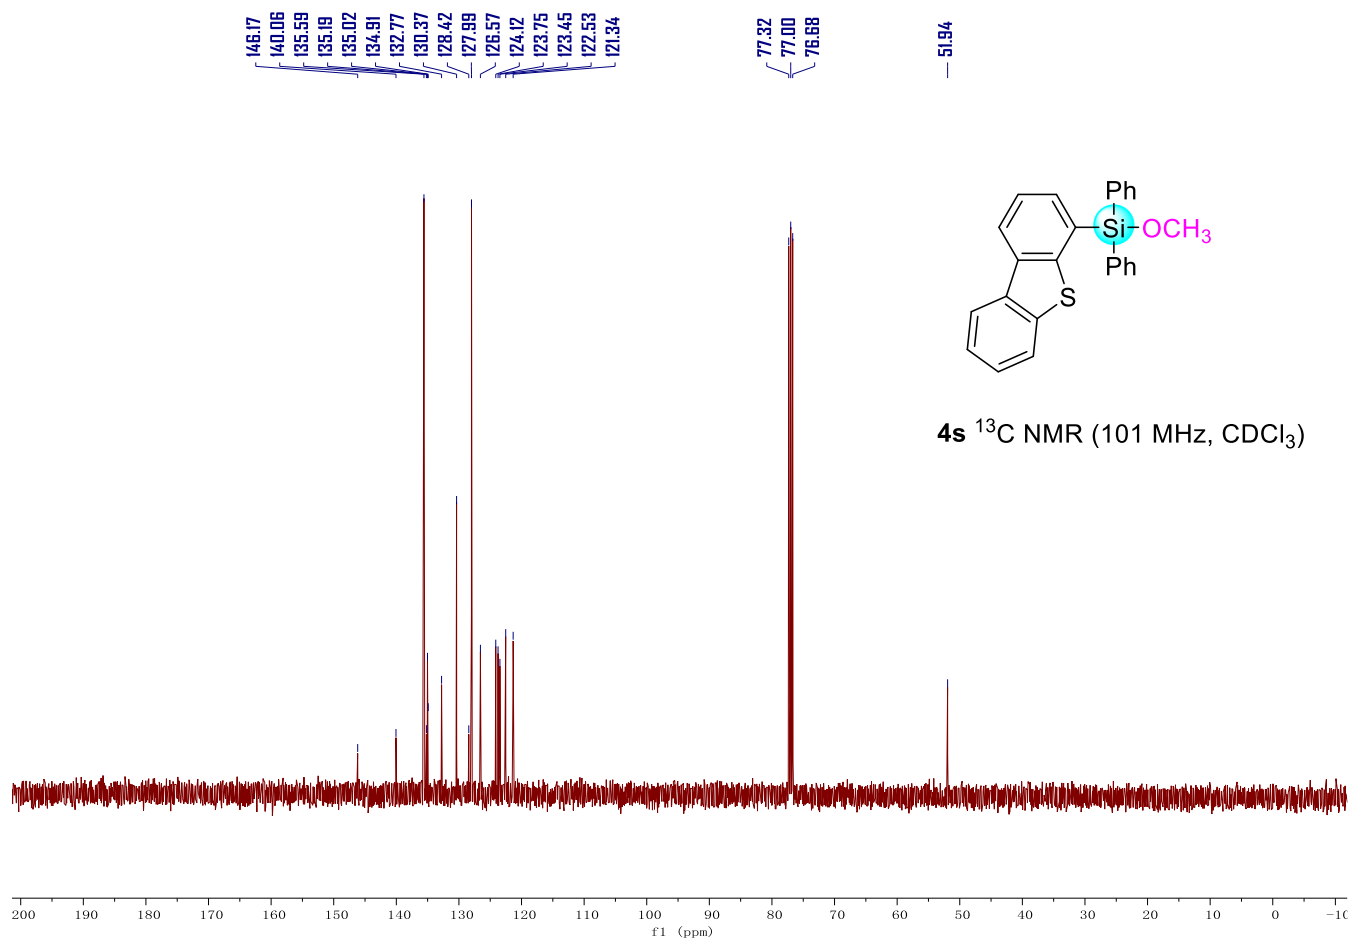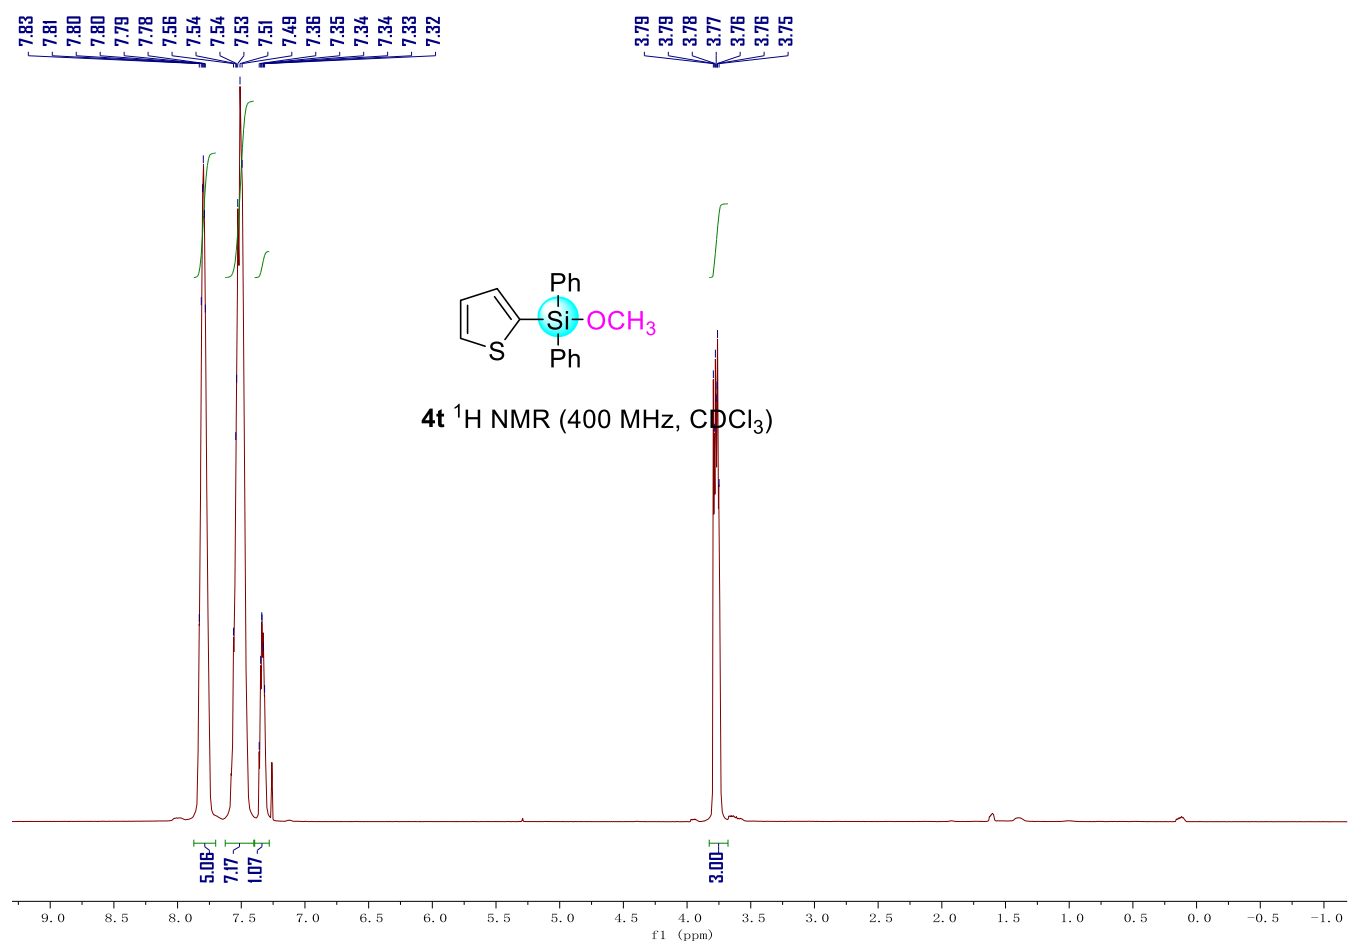

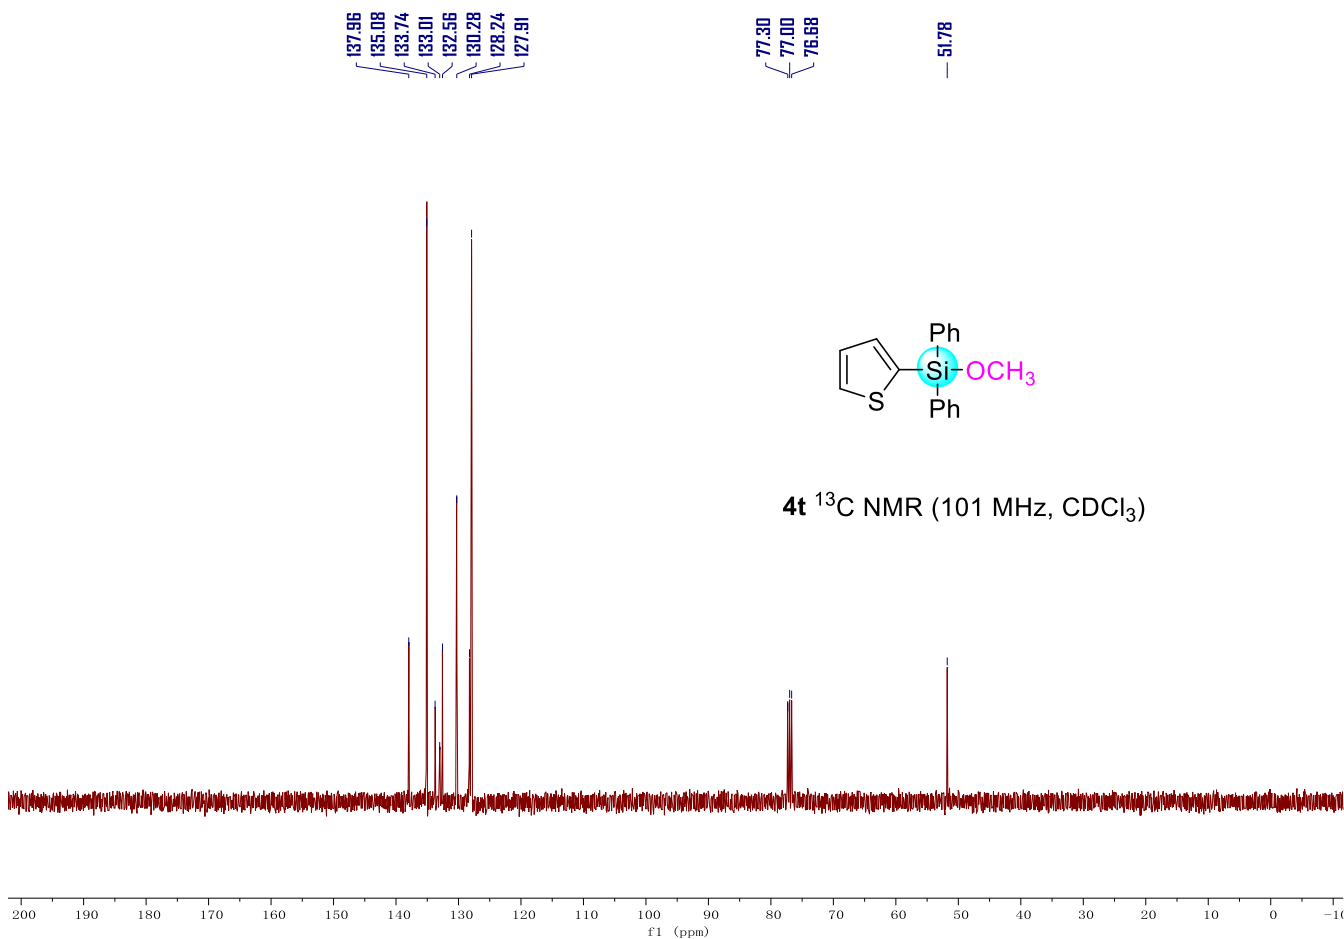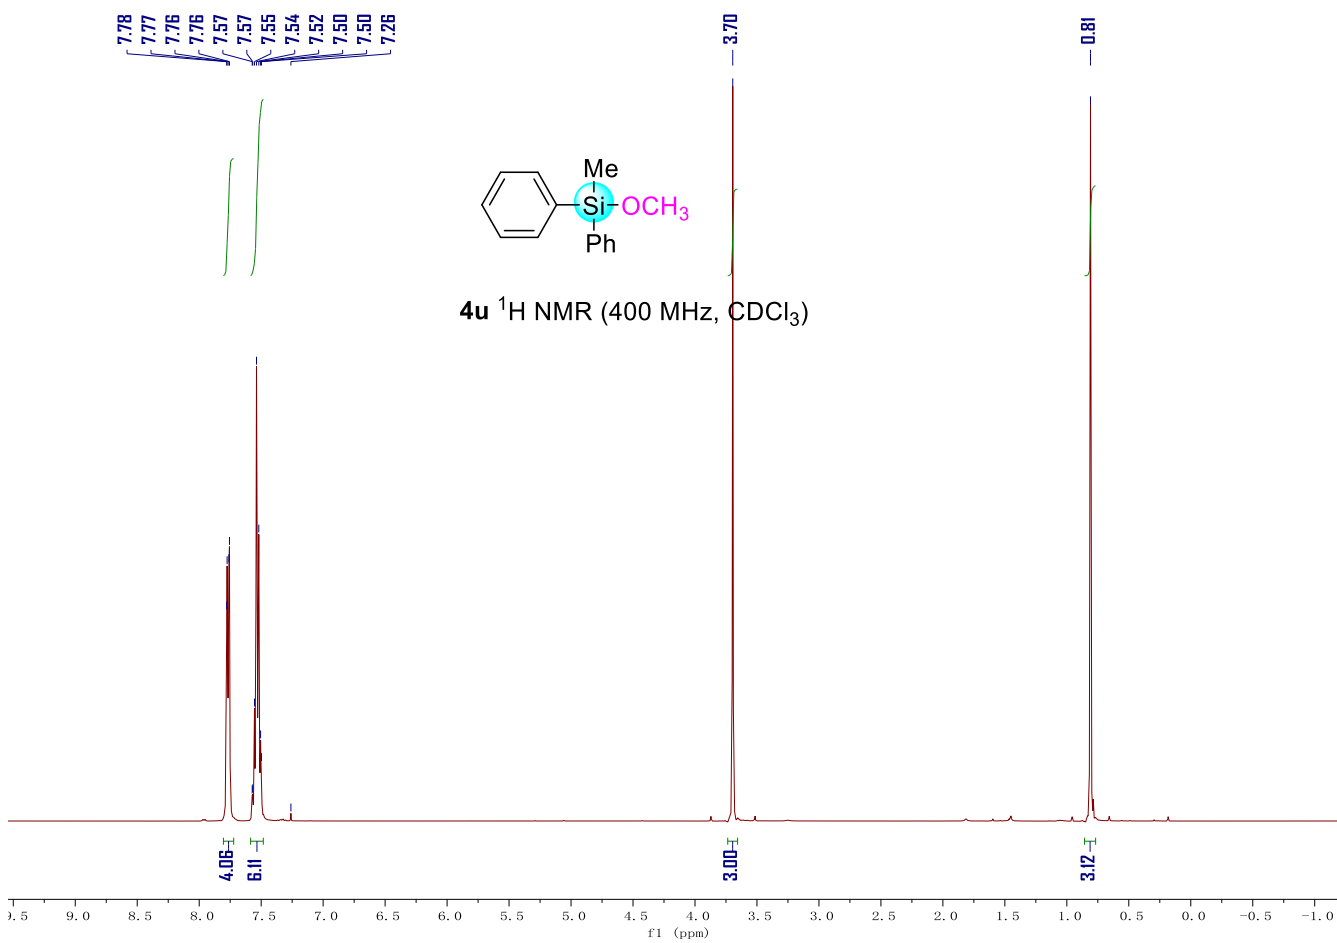

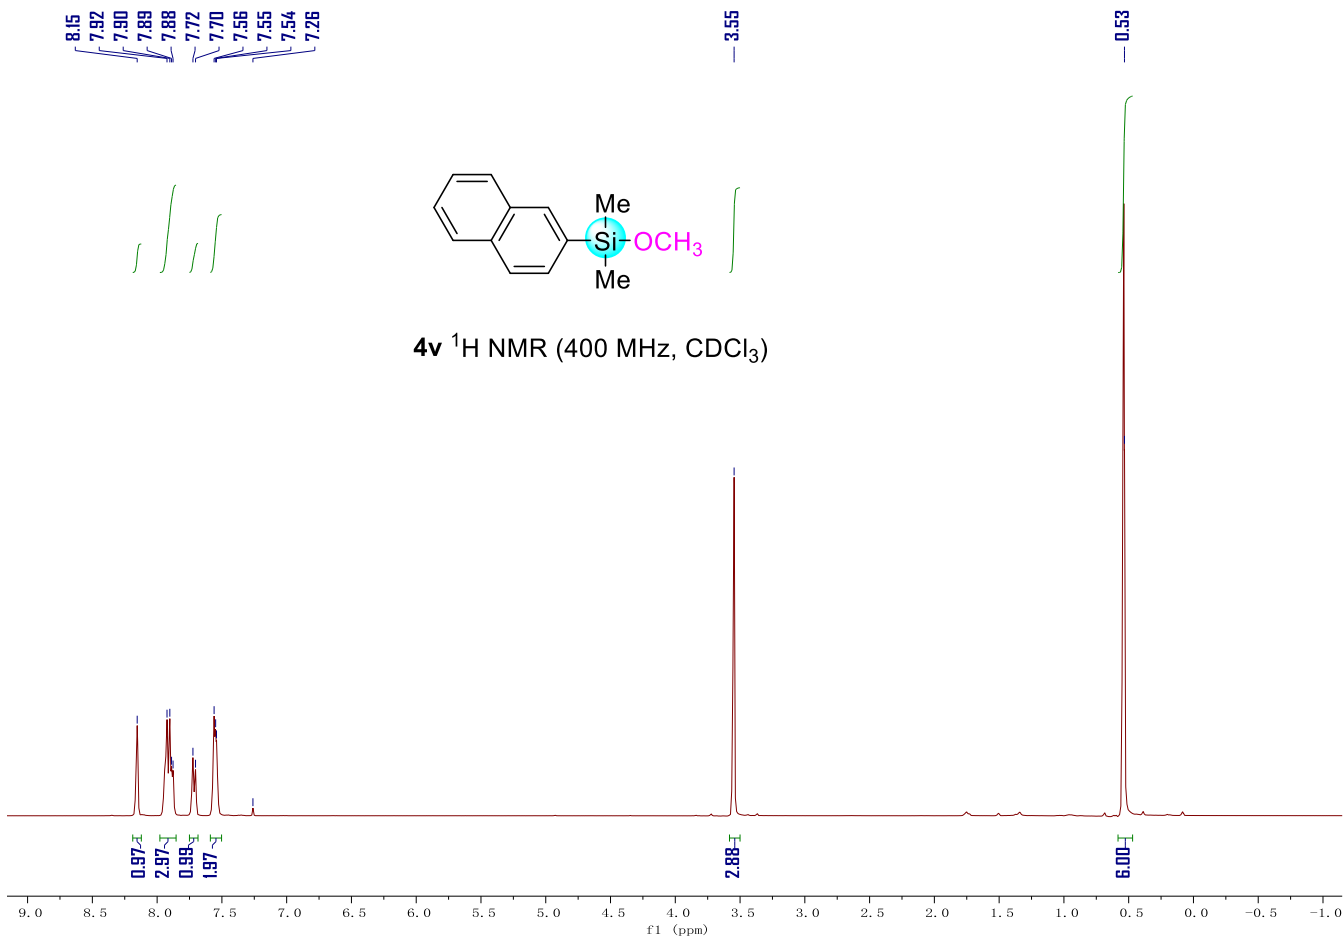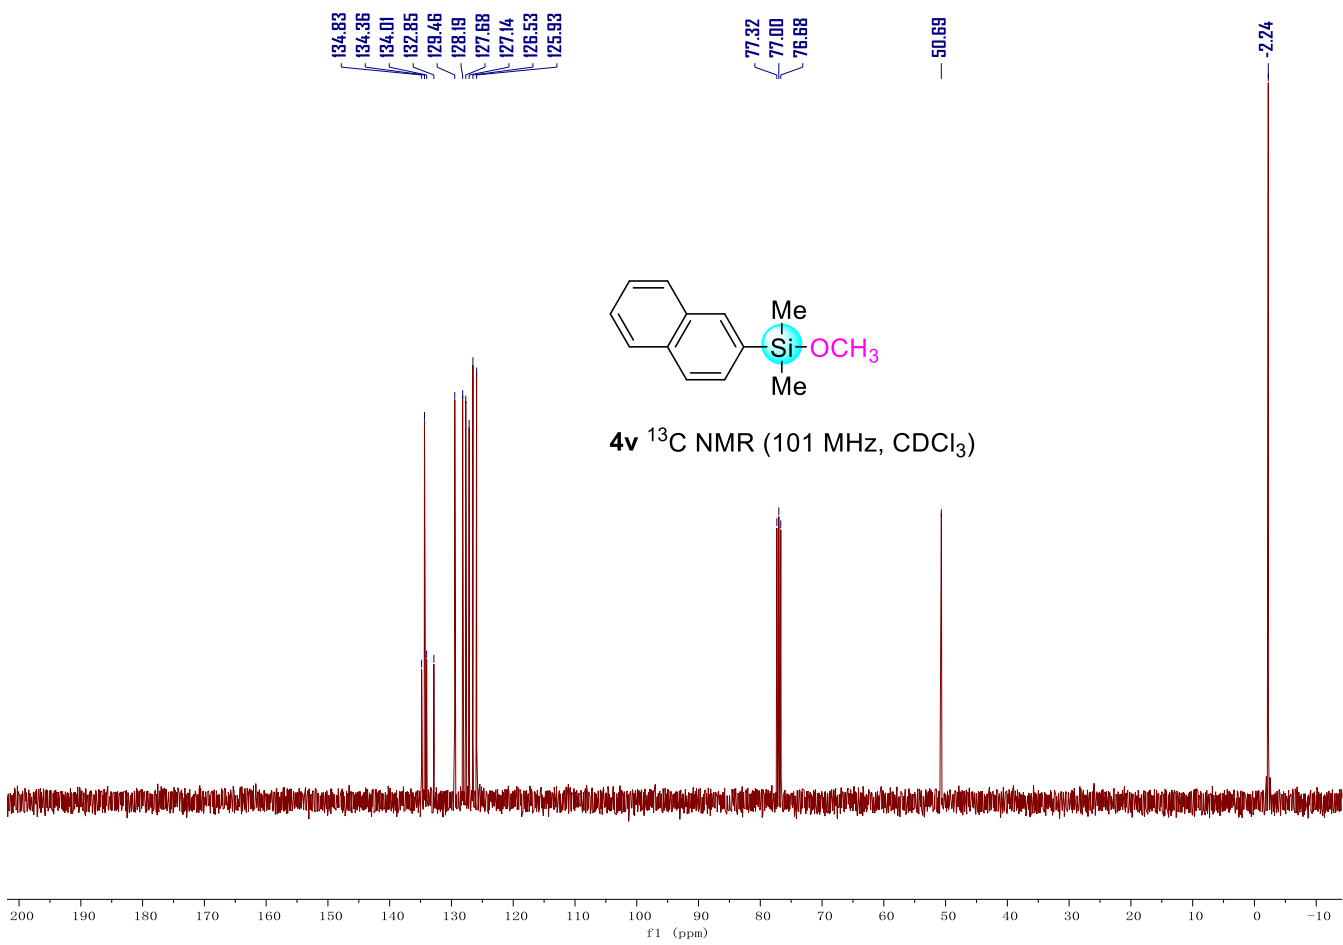



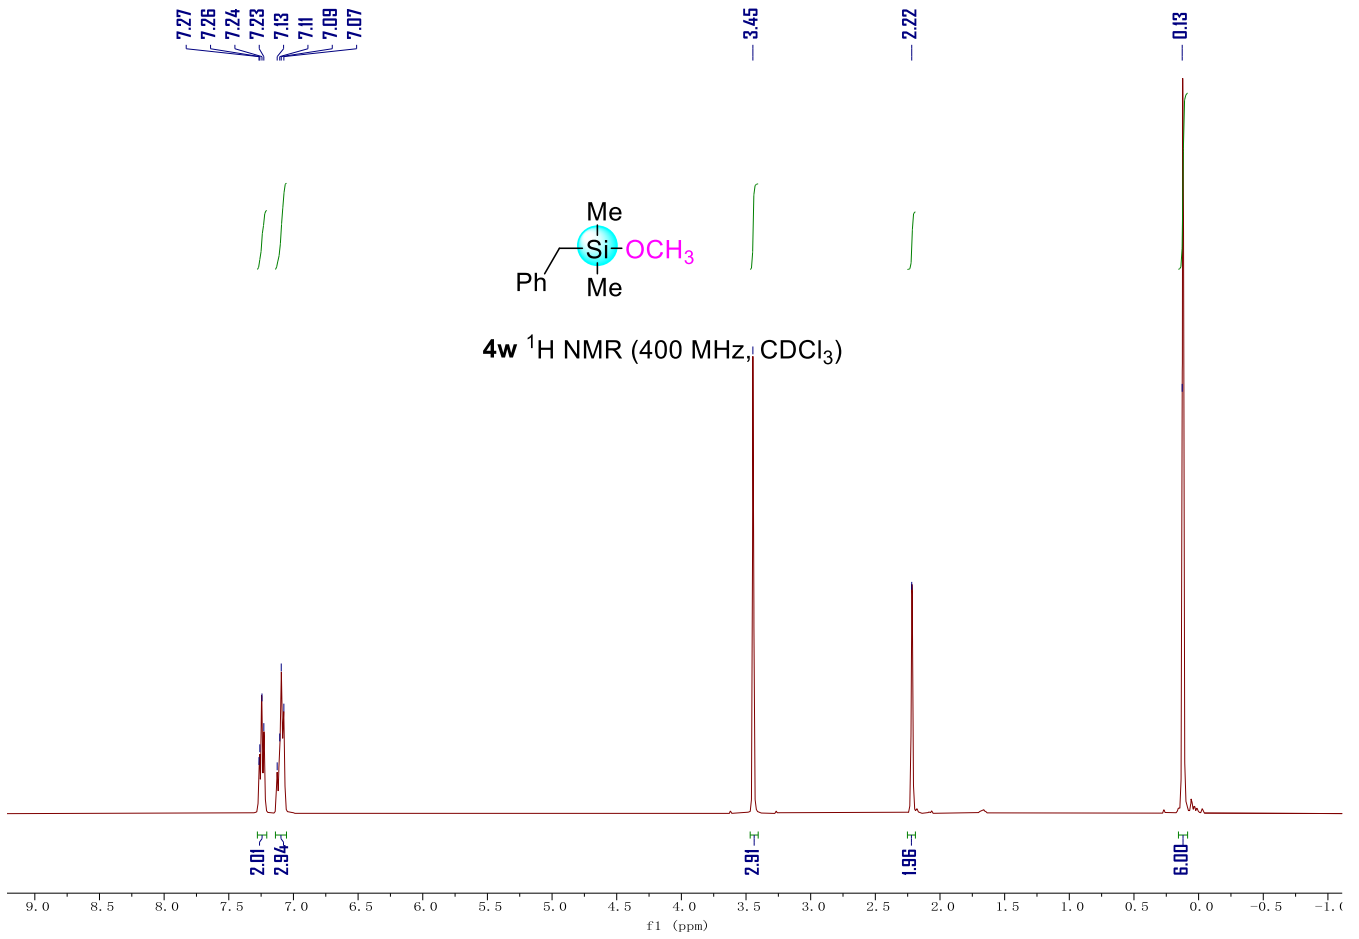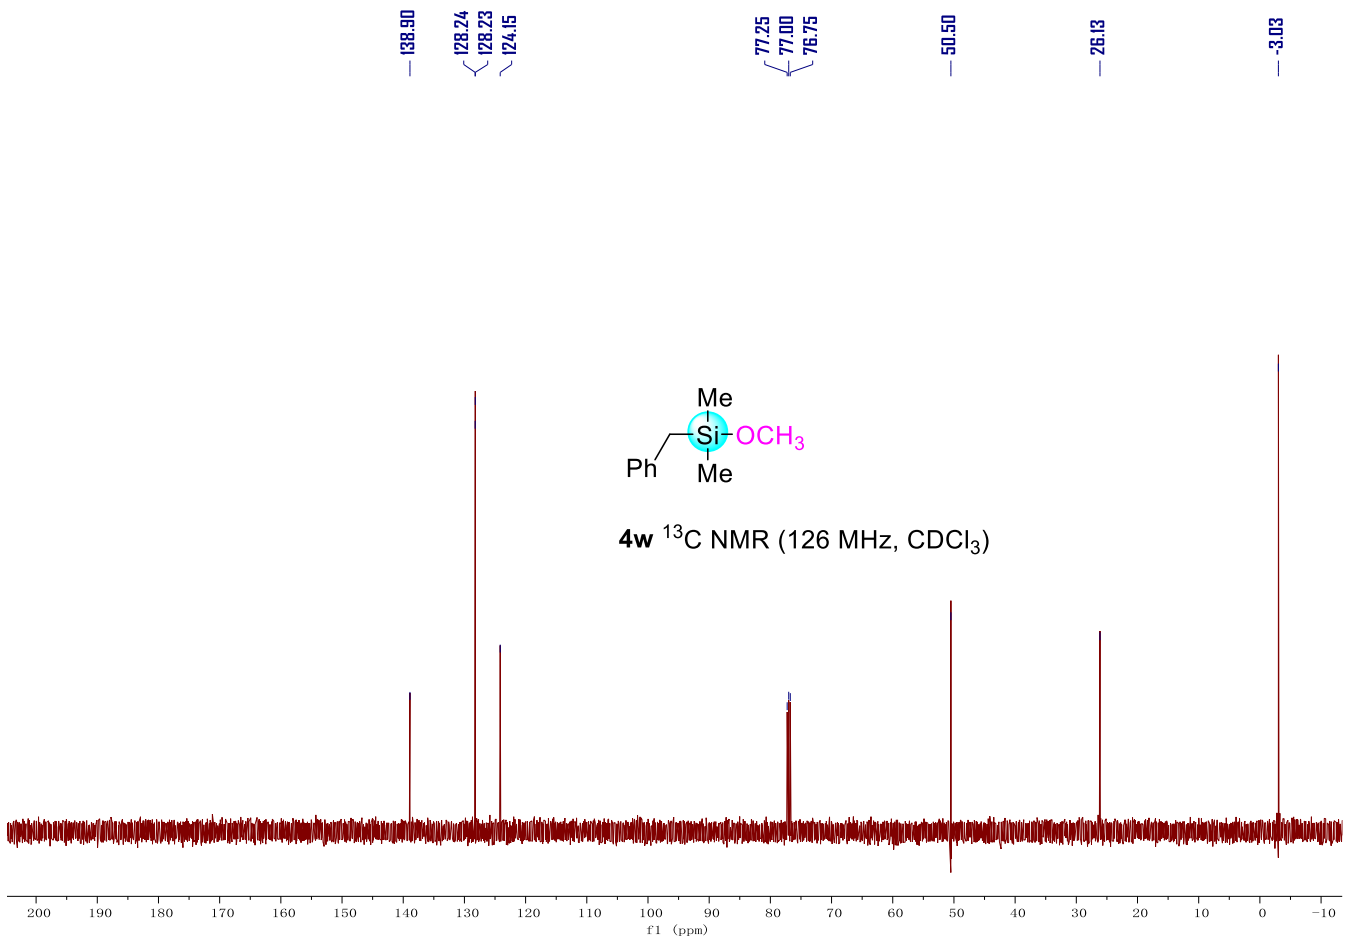

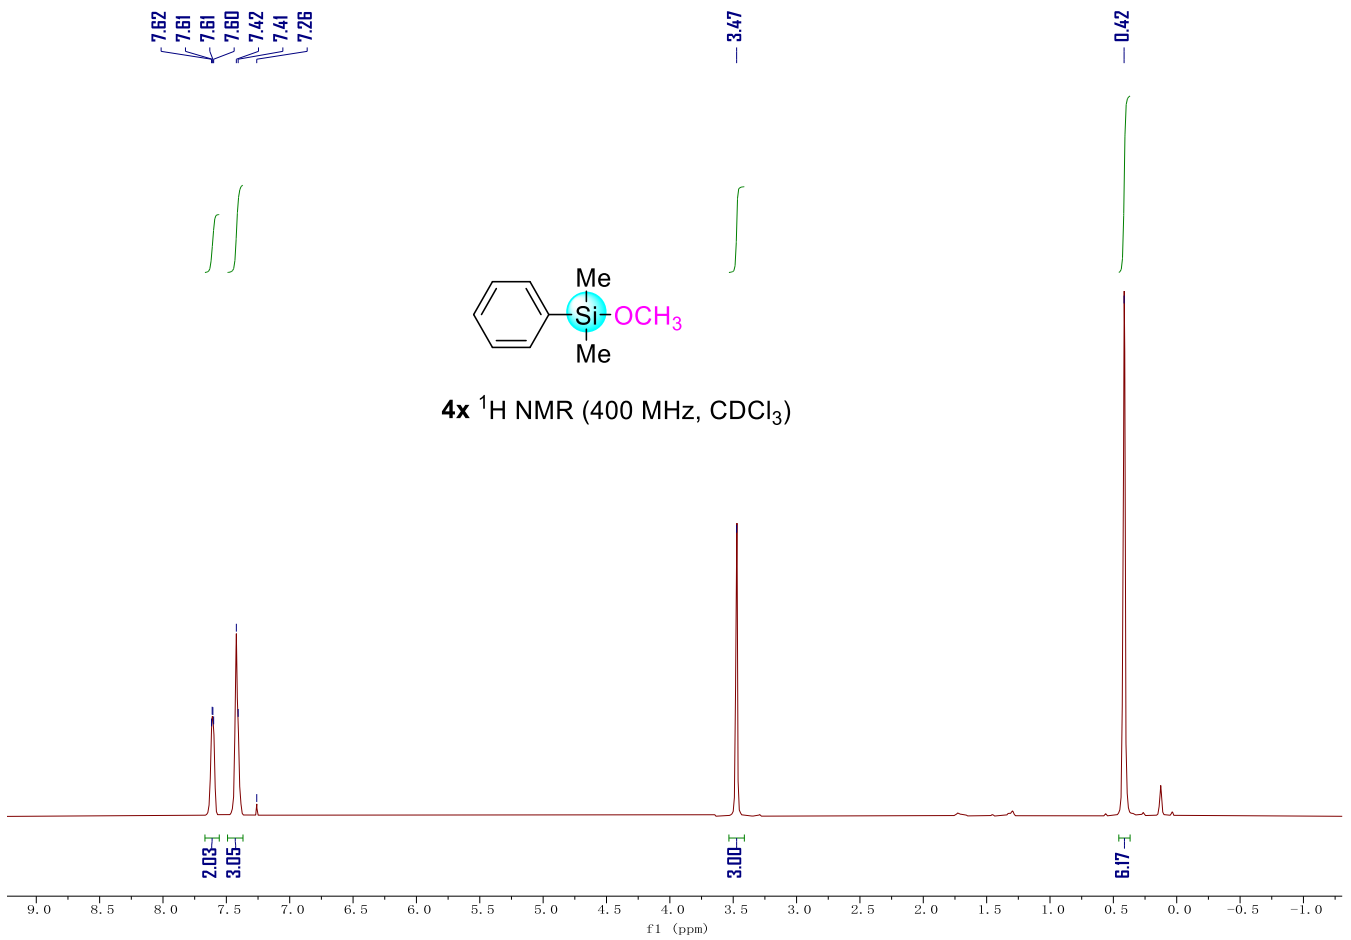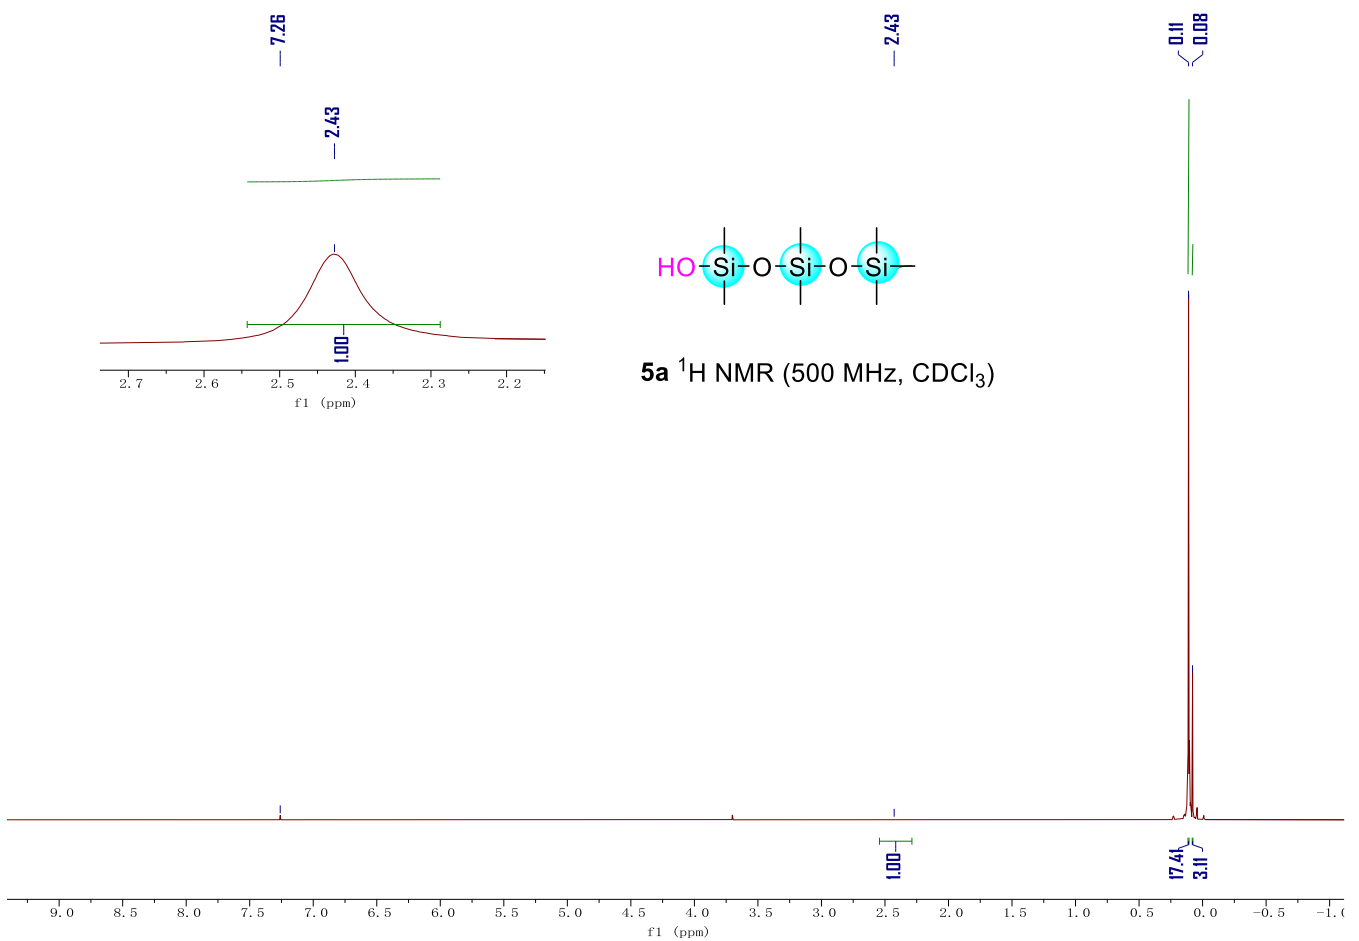

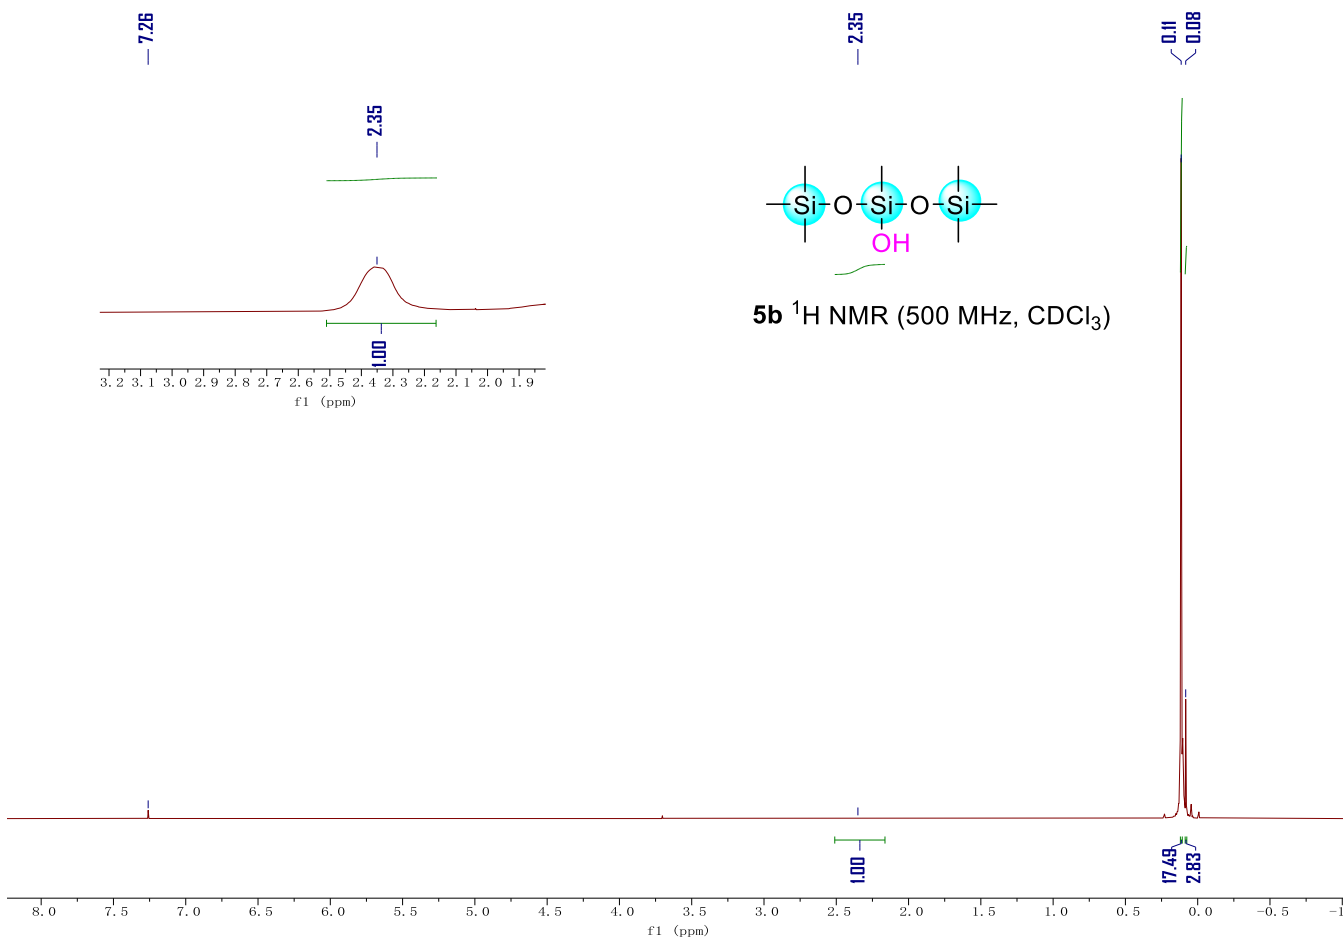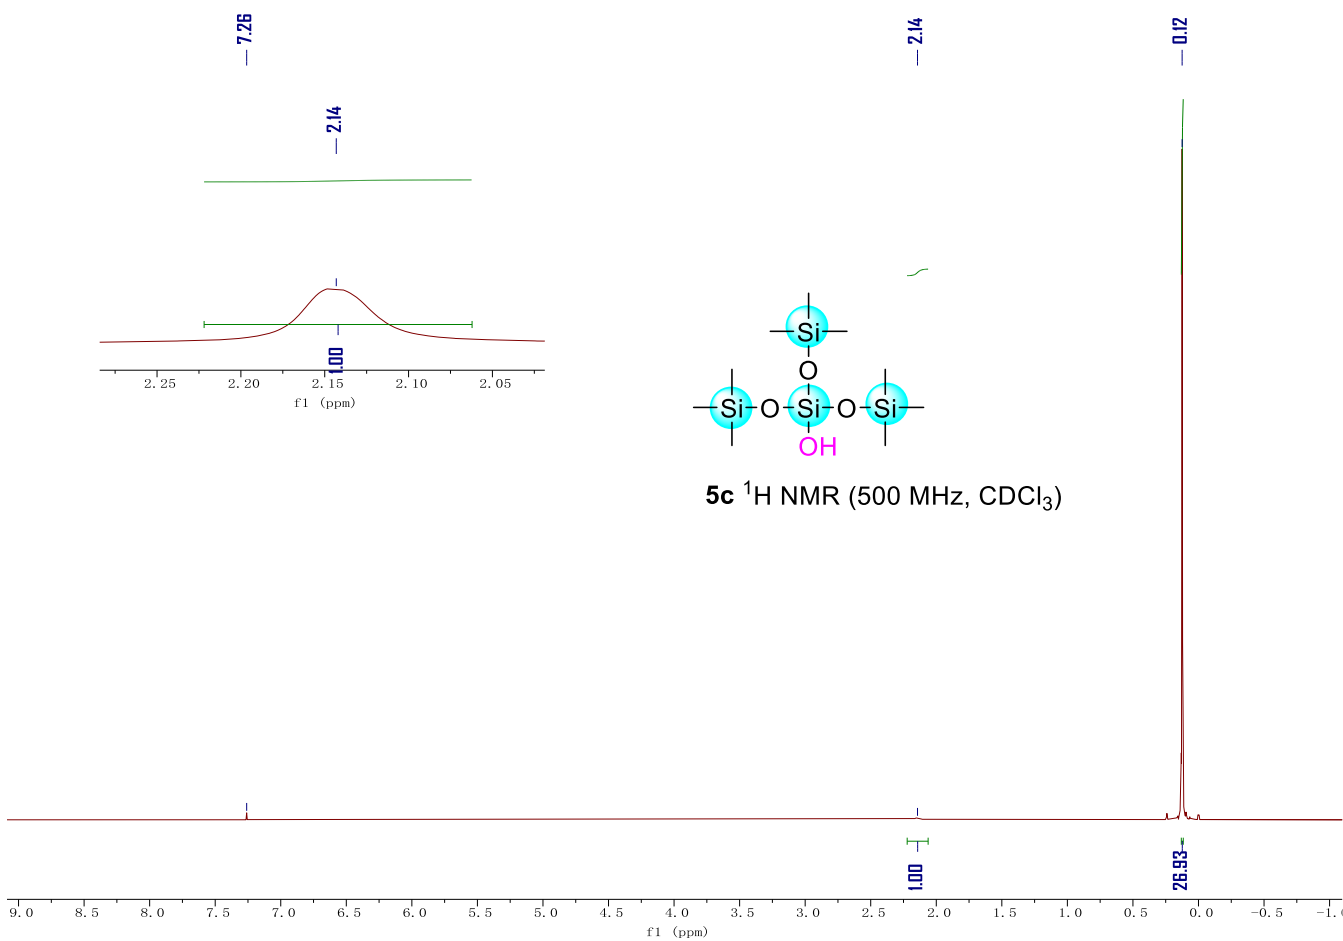

Supplement: d2qo01294d1.pdf [file d2qo01294d1.pdf]
